# Supplementary material
Source: PubMed Central journal article supplement (PMC3018729)

## Synthesis of Hexacyclic Parnafungin A and C Models

Quan Zhou and Barry B. Snider\*

Department of Chemistry MS 015, Brandeis University,

Waltham, Massachusetts 02454-9110

[snider@brandeis.edu](mailto:snider@brandeis.edu)

X-ray Crystal Structure of **30a**.....S2

Copies of  $^1\text{H}$  and  $^{13}\text{C}$  NMR spectra .....S3-S47

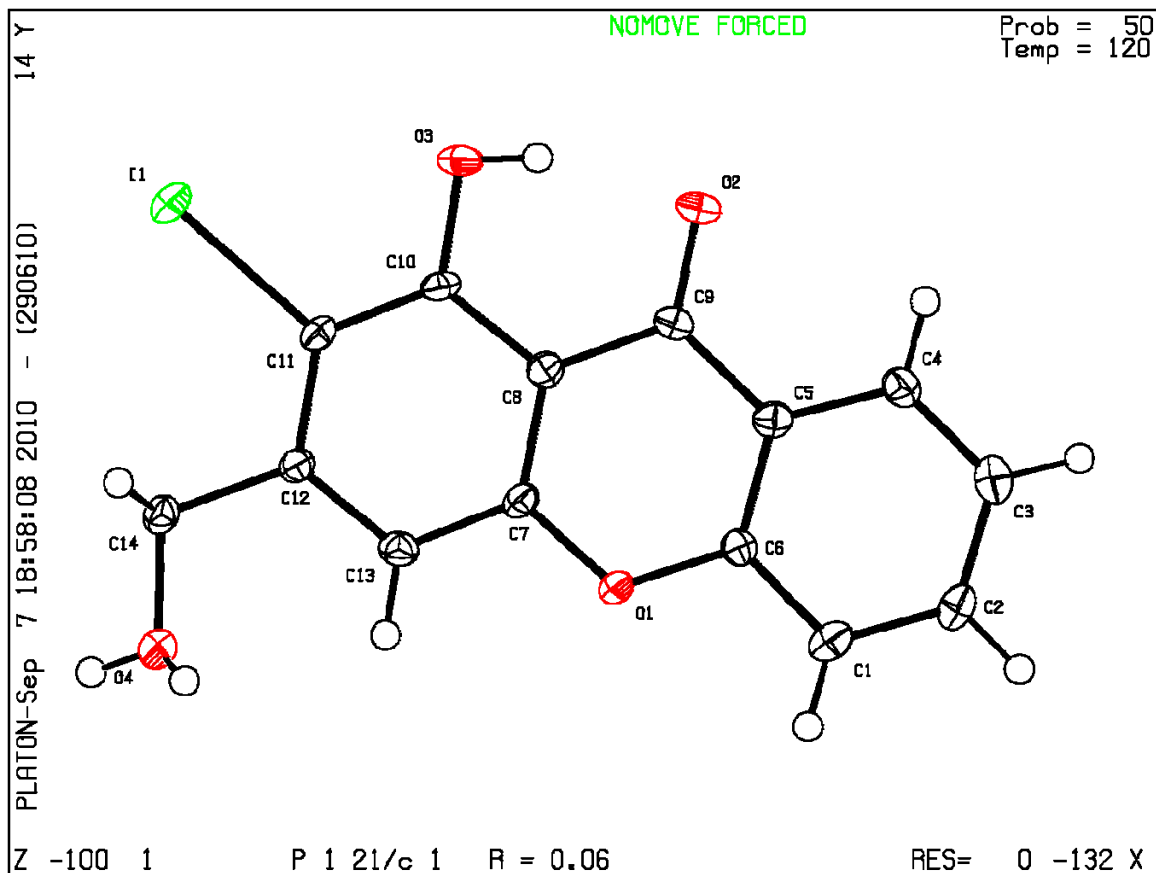Figure S1. X-ray Crystal Structure of **30a**

S3

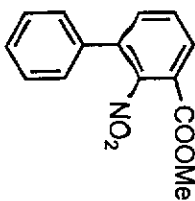

14

CDCl<sub>3</sub> 400 MHz

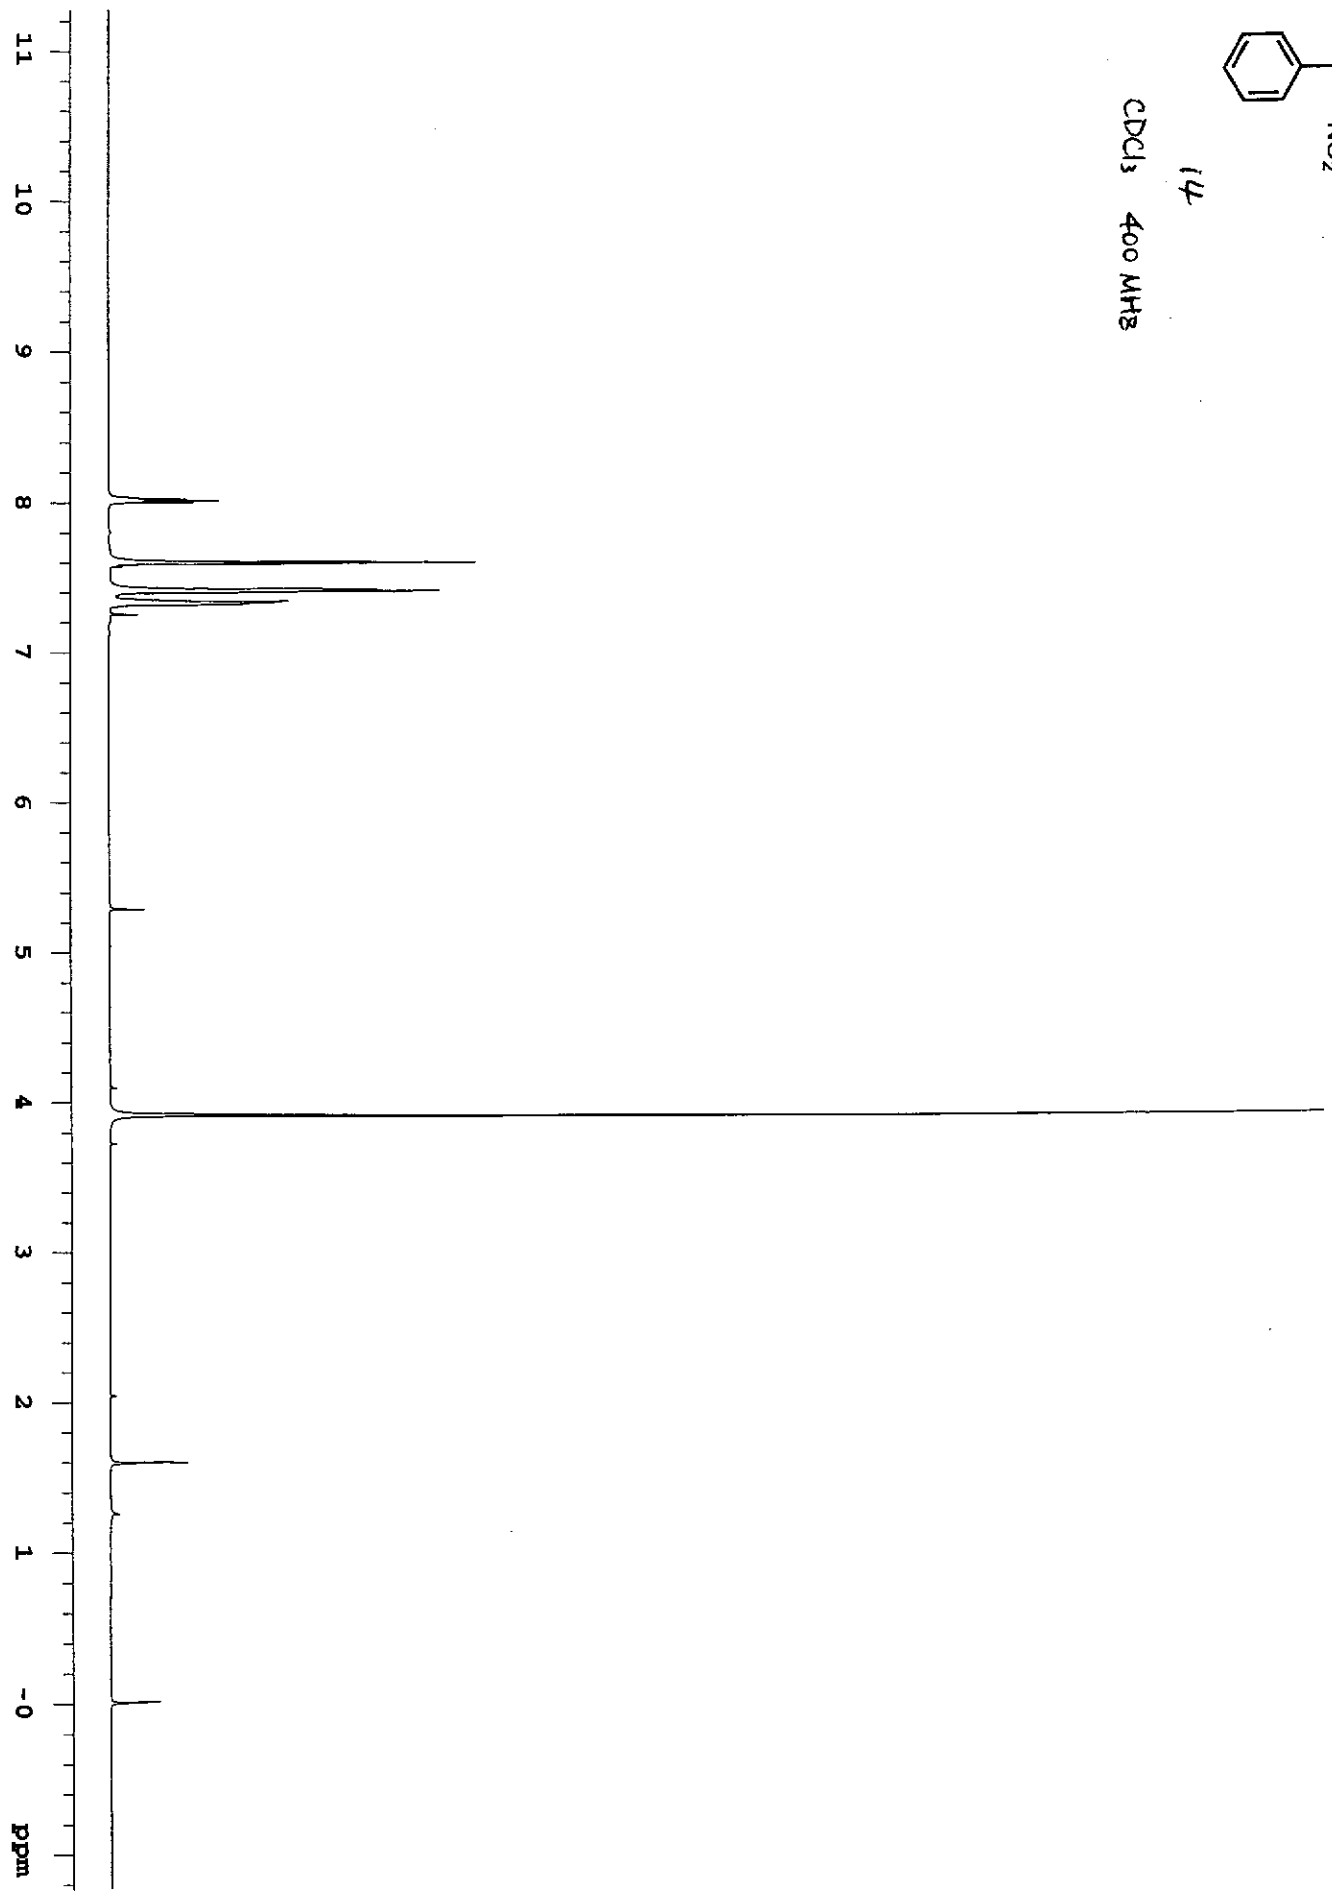

Scan - 4 - 23 - 3 - carbon

| INDEX | FREQUENCY | PPM     | HEIGHT    |
|-------|-----------|---------|-----------|
| 1     | 16465.495 | 163.793 | 22.6      |
| 2     | 13613.627 | 135.424 | 119.2     |
| 3     | 13602.183 | 135.310 | 35.8      |
| 4     | 13585.399 | 135.143 | 34.9      |
| 5     | 13069.652 | 130.012 | 118.0     |
| 6     | 13060.496 | 129.921 | 117.8     |
| 7     | 12953.685 | 128.859 | 127.1     |
| 8     | 12939.952 | 128.722 | 210.8 (2) |
| 9     | 12880.443 | 128.130 | 226.9 (2) |
| 10    | 12377.666 | 123.129 | 28.4      |
| 11    | 7772.563  | 77.319  | 46.3      |
| 12    | 7740.520  | 77.000  | 48.7      |
| 13    | 7708.476  | 76.681  | 48.9      |
| 14    | 5334.971  | 53.070  | 75.0      |

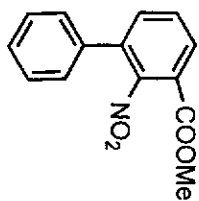

CDCl<sub>3</sub> 100 MHz

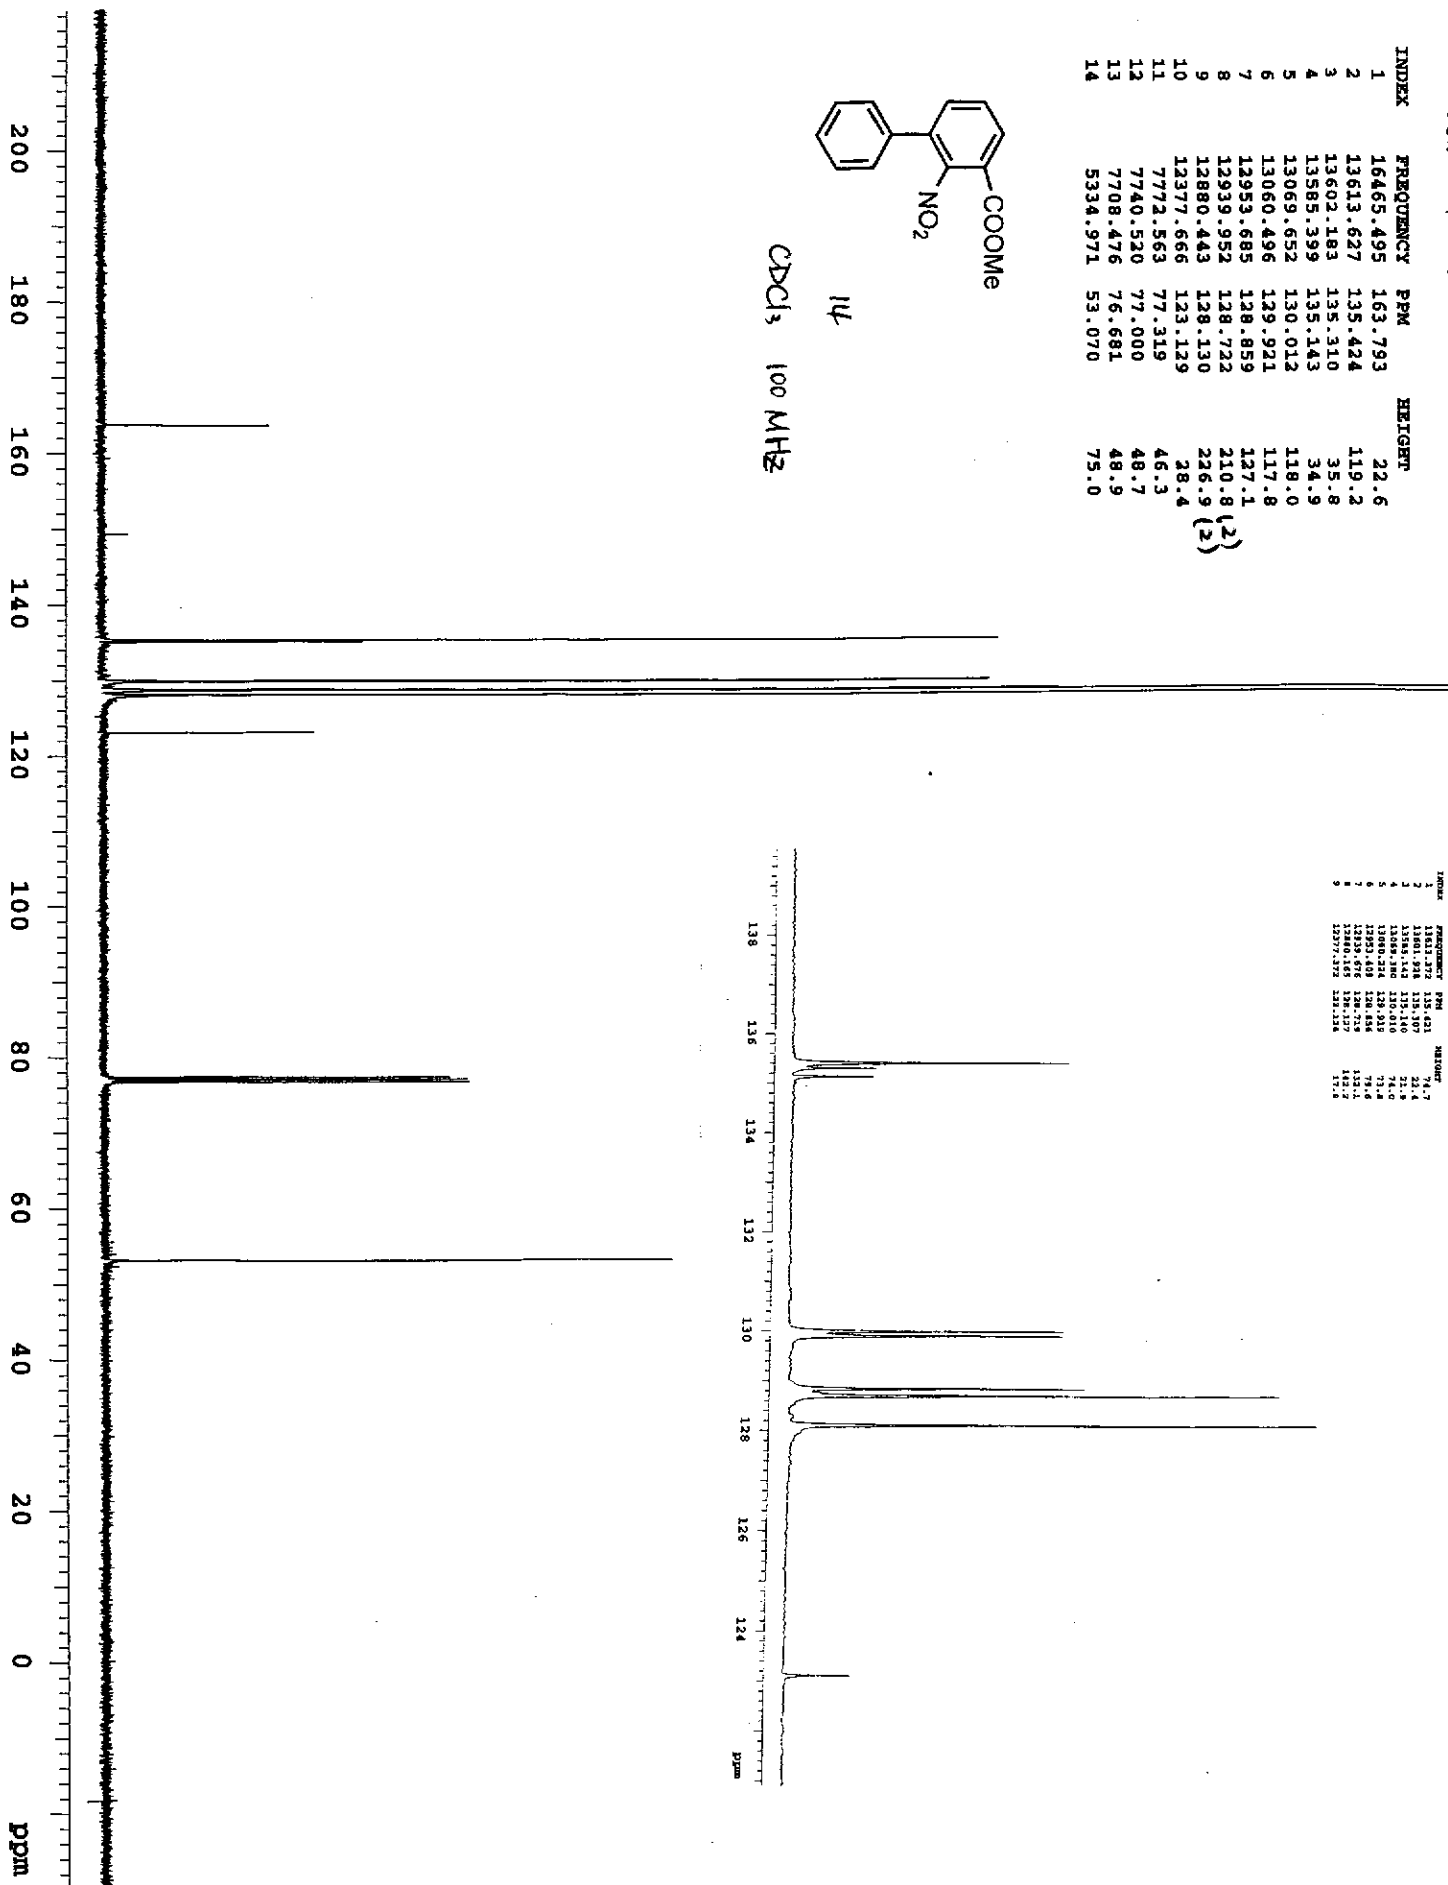

4 (Zhou-4-18-2

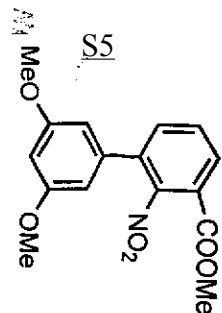

20b

CDCl<sub>3</sub> 400 MHz

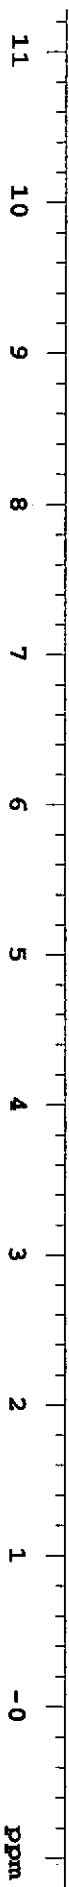

| INDEX | FREQUENCY | PPM     | HEIGHT |
|-------|-----------|---------|--------|
| 1     | 16463.969 | 163.778 | 11.0   |
| 2     | 16163.371 | 160.788 | 43.0   |
| 3     | 13780.711 | 137.086 | 21.6   |
| 4     | 13593.791 | 135.226 | 61.5   |
| 5     | 13583.872 | 135.128 | 17.2   |
| 6     | 13085.673 | 130.172 | 59.2   |
| 7     | 13055.918 | 129.876 | 69.2   |
| 8     | 12377.665 | 123.129 | 22.4   |
| 9     | 10705.302 | 106.493 | 142.8  |
| 10    | 10144.541 | 100.914 | 69.2   |
| 11    | 7772.563  | 77.319  | 161.8  |
| 12    | 7740.519  | 77.000  | 162.0  |
| 13    | 7709.239  | 76.689  | 160.0  |
| 14    | 5570.719  | 55.416  | 128.6  |
| 15    | 5338.786  | 53.108  | 47.5   |
| 16    | -1.790    | -0.018  | 11.1   |

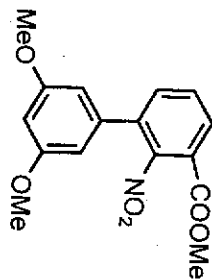

20b

CDCl<sub>3</sub> 100MHz

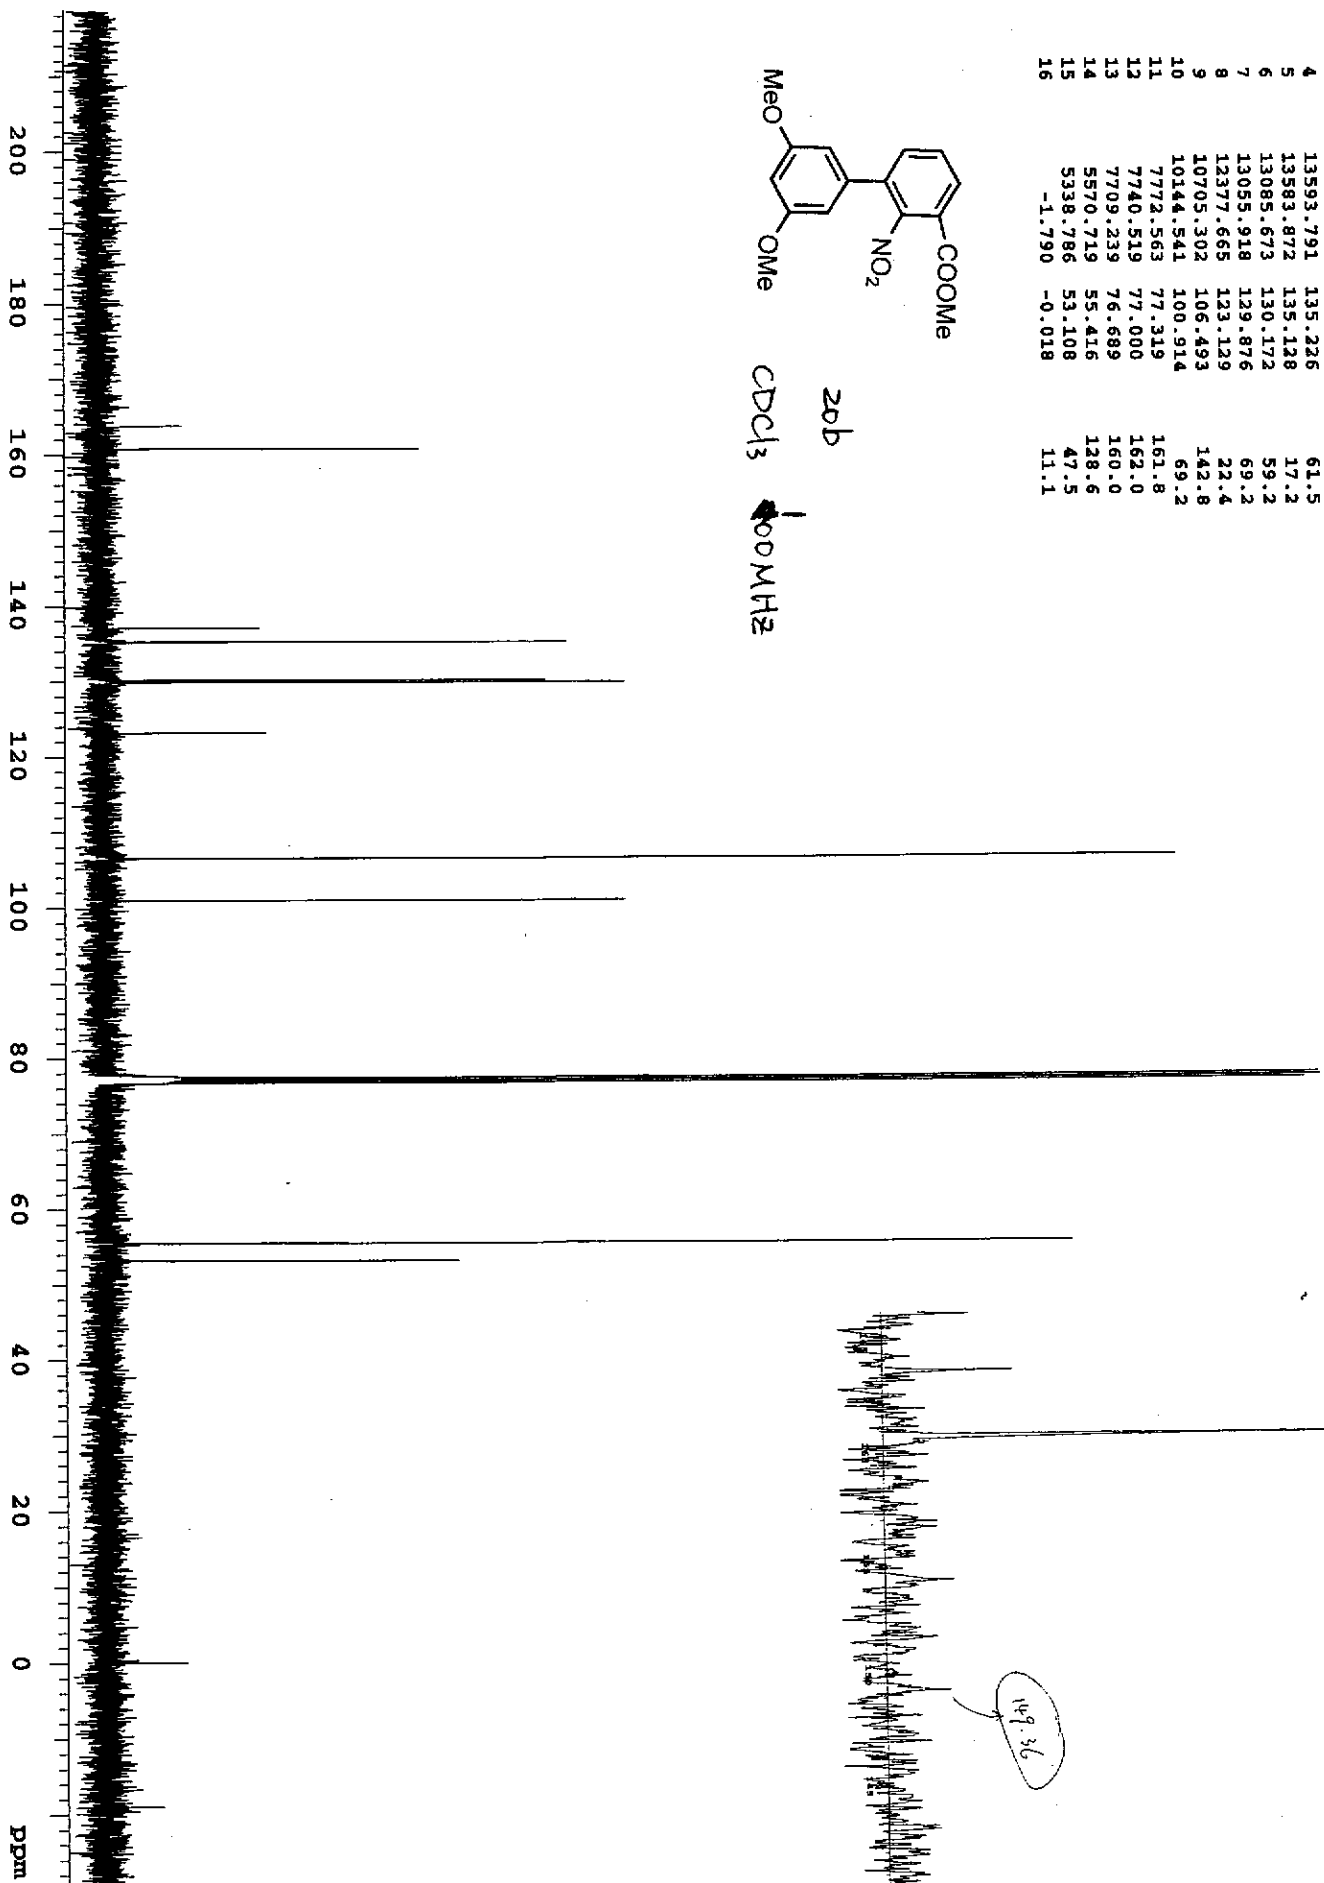

NAME: 20b  
 EXPNO: 1  
 F2: 100.628150  
 F3: 100.628150  
 PROCNO: 1  
 GPC: 0  
 HETERO: 0  
 INSTRUM: spect  
 NS: 1024  
 NS2: 1024  
 NS3: 1024  
 SFO: 100.628150  
 TD: 1024  
 TD0: 1024  
 TD1: 1024  
 TD2: 1024  
 TD3: 1024  
 TE: 300.2  
 URG: 0  
 VER: 3.1



| INDEX | FREQUENCY | PPM     | HEIGHT |
|-------|-----------|---------|--------|
| 1     | 16989.634 | 169.007 | 5.3    |
| 2     | 15394.328 | 153.137 | 7.8    |
| 3     | 13585.398 | 135.143 | 8.9    |
| 4     | 13490.794 | 134.202 | 38.3   |
| 5     | 13007.090 | 129.390 | 71.4   |
| 6     | 12949.107 | 128.813 | 37.6   |
| 7     | 12830.851 | 127.637 | 65.4   |
| 8     | 12711.833 | 126.453 | 8.7    |
| 9     | 12618.754 | 125.527 | 32.1   |
| 10    | 12530.253 | 124.647 | 40.1   |
| 11    | 11378.214 | 113.187 | 7.6    |
| 12    | 7772.563  | 77.319  | 164.9  |
| 13    | 7761.119  | 77.205  | 18.7   |
| 14    | 7740.519  | 77.000  | 169.7  |
| 15    | 7708.476  | 76.681  | 163.3  |
| 16    | -1.790    | -0.018  | 10.1   |
| 17    | -1919.057 | -19.090 | -4.6   |

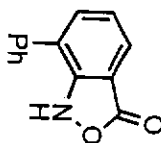

Z/A

CDCl<sub>3</sub> 100MHz

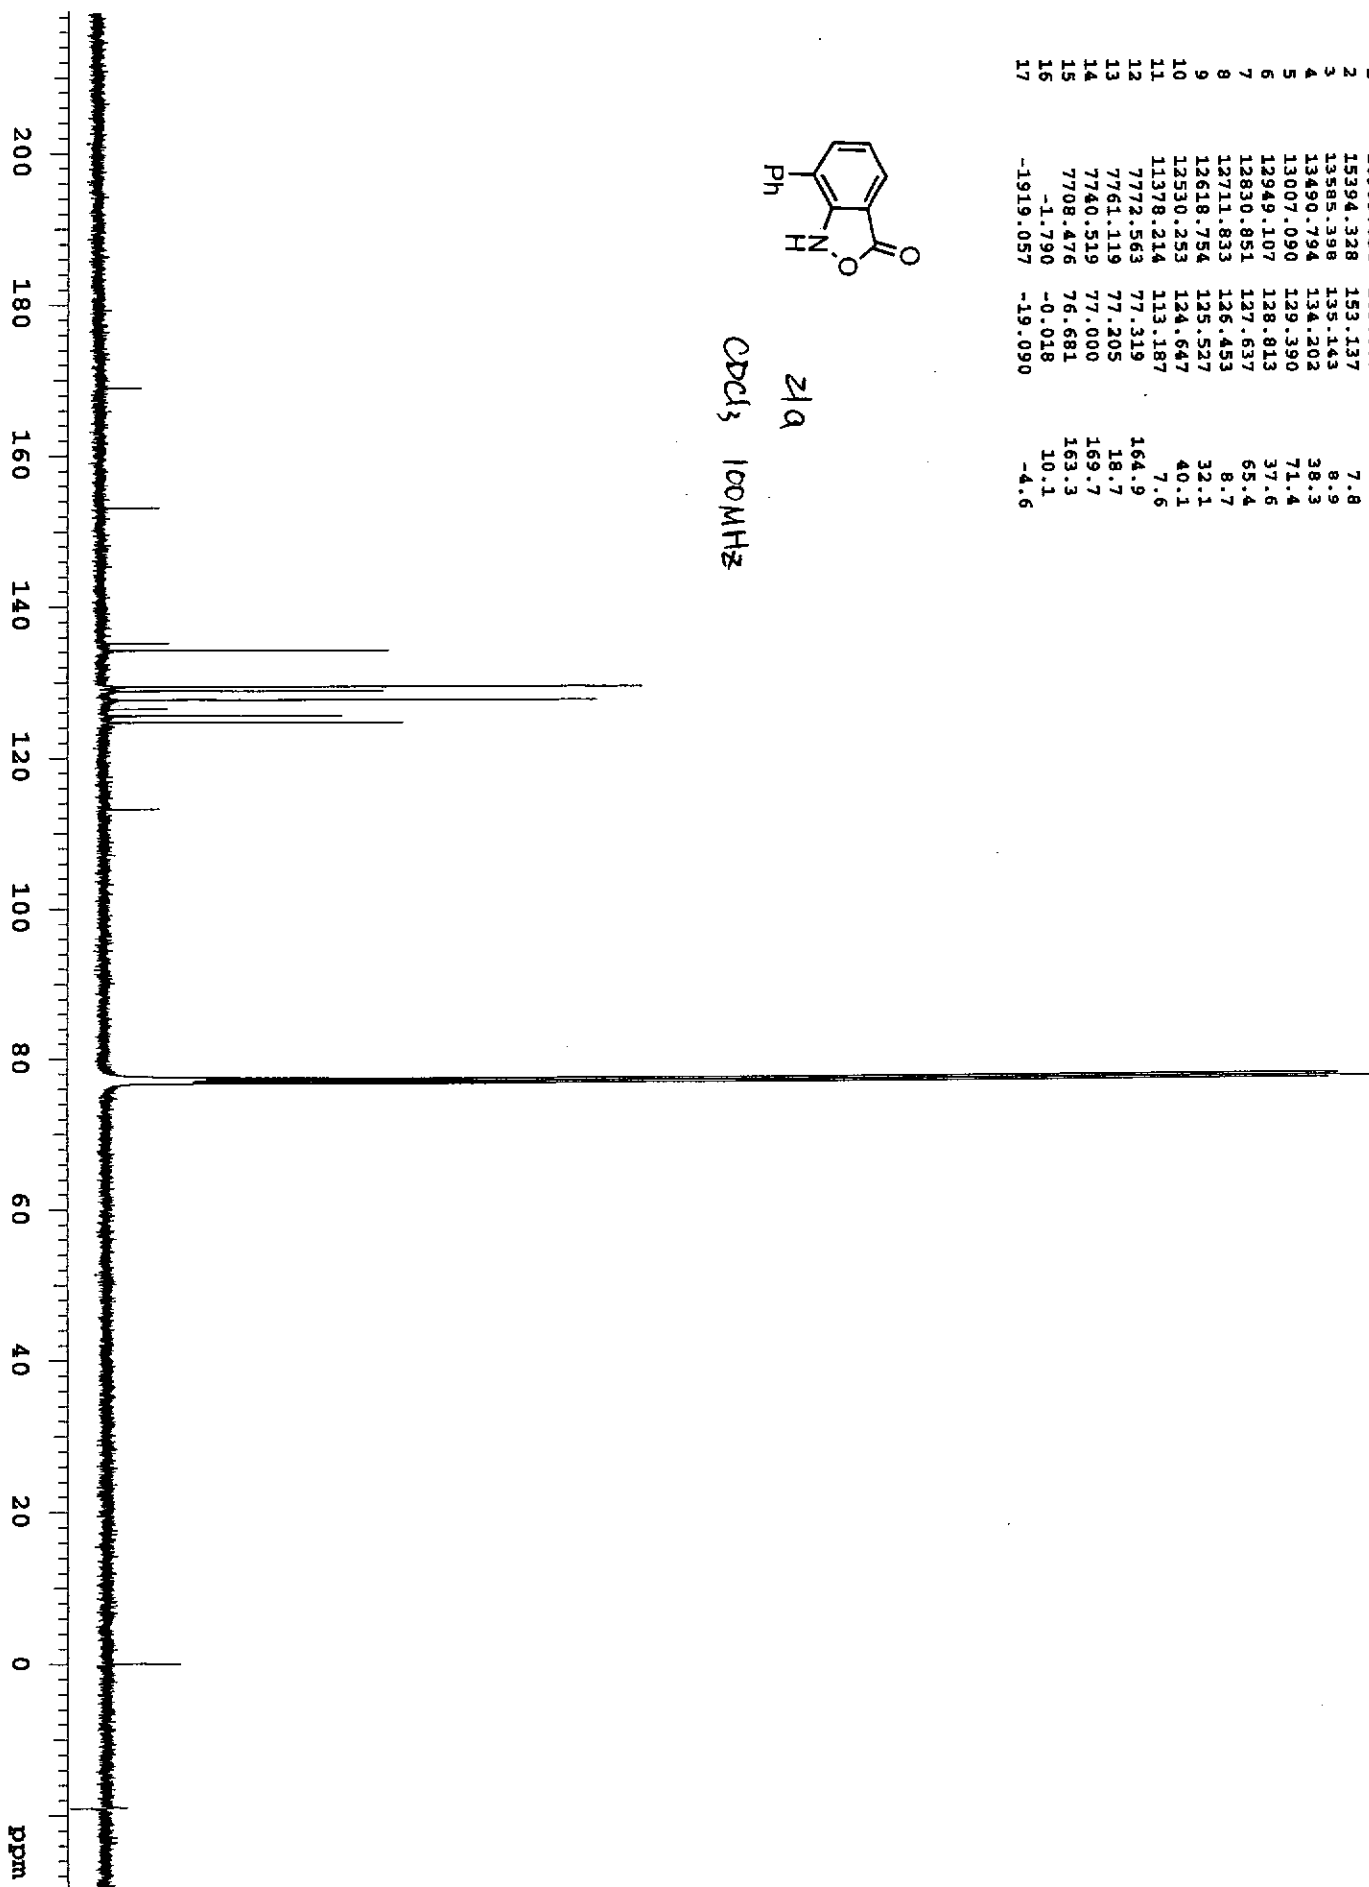



Qcom-4-31-1

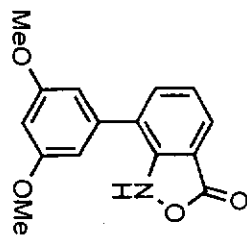

CDCl<sub>3</sub> 400 MHz  
21 b

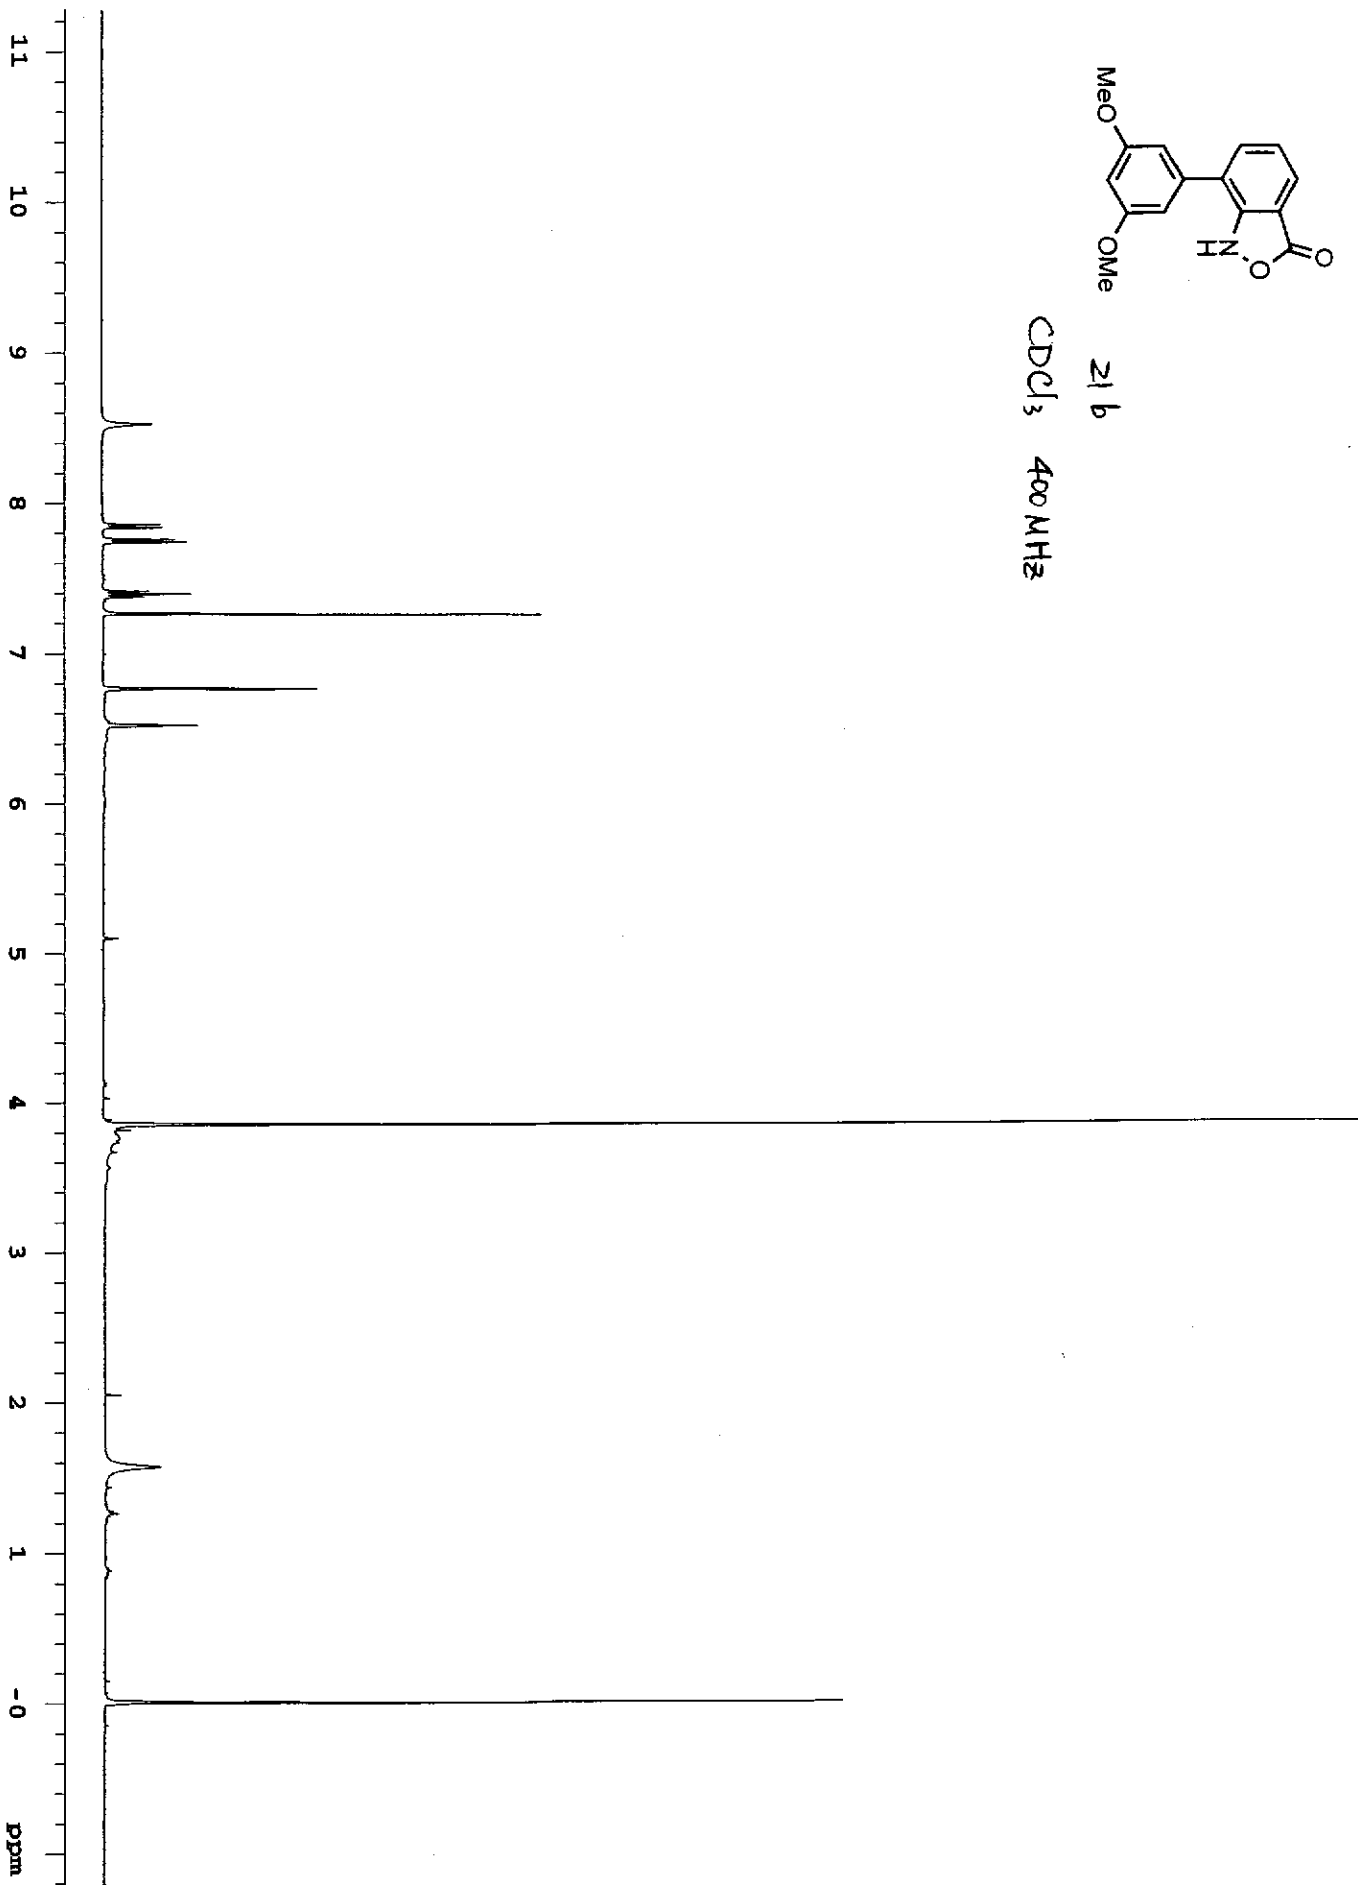

| INDEX | FREQUENCY | PPM     | HEIGHT |
|-------|-----------|---------|--------|
| 1     | 16983.531 | 168.946 | 6.3    |
| 2     | 16235.850 | 161.509 | 33.0   |
| 3     | 15385.172 | 153.046 | 12.2   |
| 4     | 13772.318 | 137.002 | 14.7   |
| 5     | 13471.720 | 134.012 | 40.2   |
| 6     | 12701.151 | 126.347 | 12.6   |
| 7     | 12605.021 | 125.390 | 37.9   |
| 8     | 12547.801 | 124.821 | 47.3   |
| 9     | 11374.400 | 113.149 | 12.5   |
| 10    | 10762.522 | 107.062 | 6.2    |
| 11    | 10626.719 | 105.711 | 87.0   |
| 12    | 10106.394 | 100.535 | 41.1   |
| 13    | 7772.563  | 77.319  | 344.5  |
| 14    | 7761.119  | 77.205  | 27.9   |
| 15    | 7740.519  | 77.000  | 355.2  |
| 16    | 7708.476  | 76.681  | 346.7  |
| 17    | 5581.401  | 55.522  | 84.9   |
| 18    | 5566.142  | 55.370  | 7.3    |
| 19    | -1.790    | -0.018  | 22.2   |
| 20    | -1912.191 | -19.022 | -7.6   |
| 21    | -1944.997 | -19.348 | -6.2   |

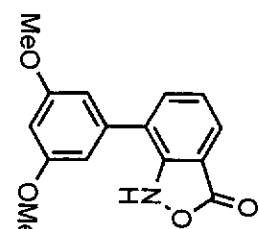

21b  
CDCl<sub>3</sub> 100MHz

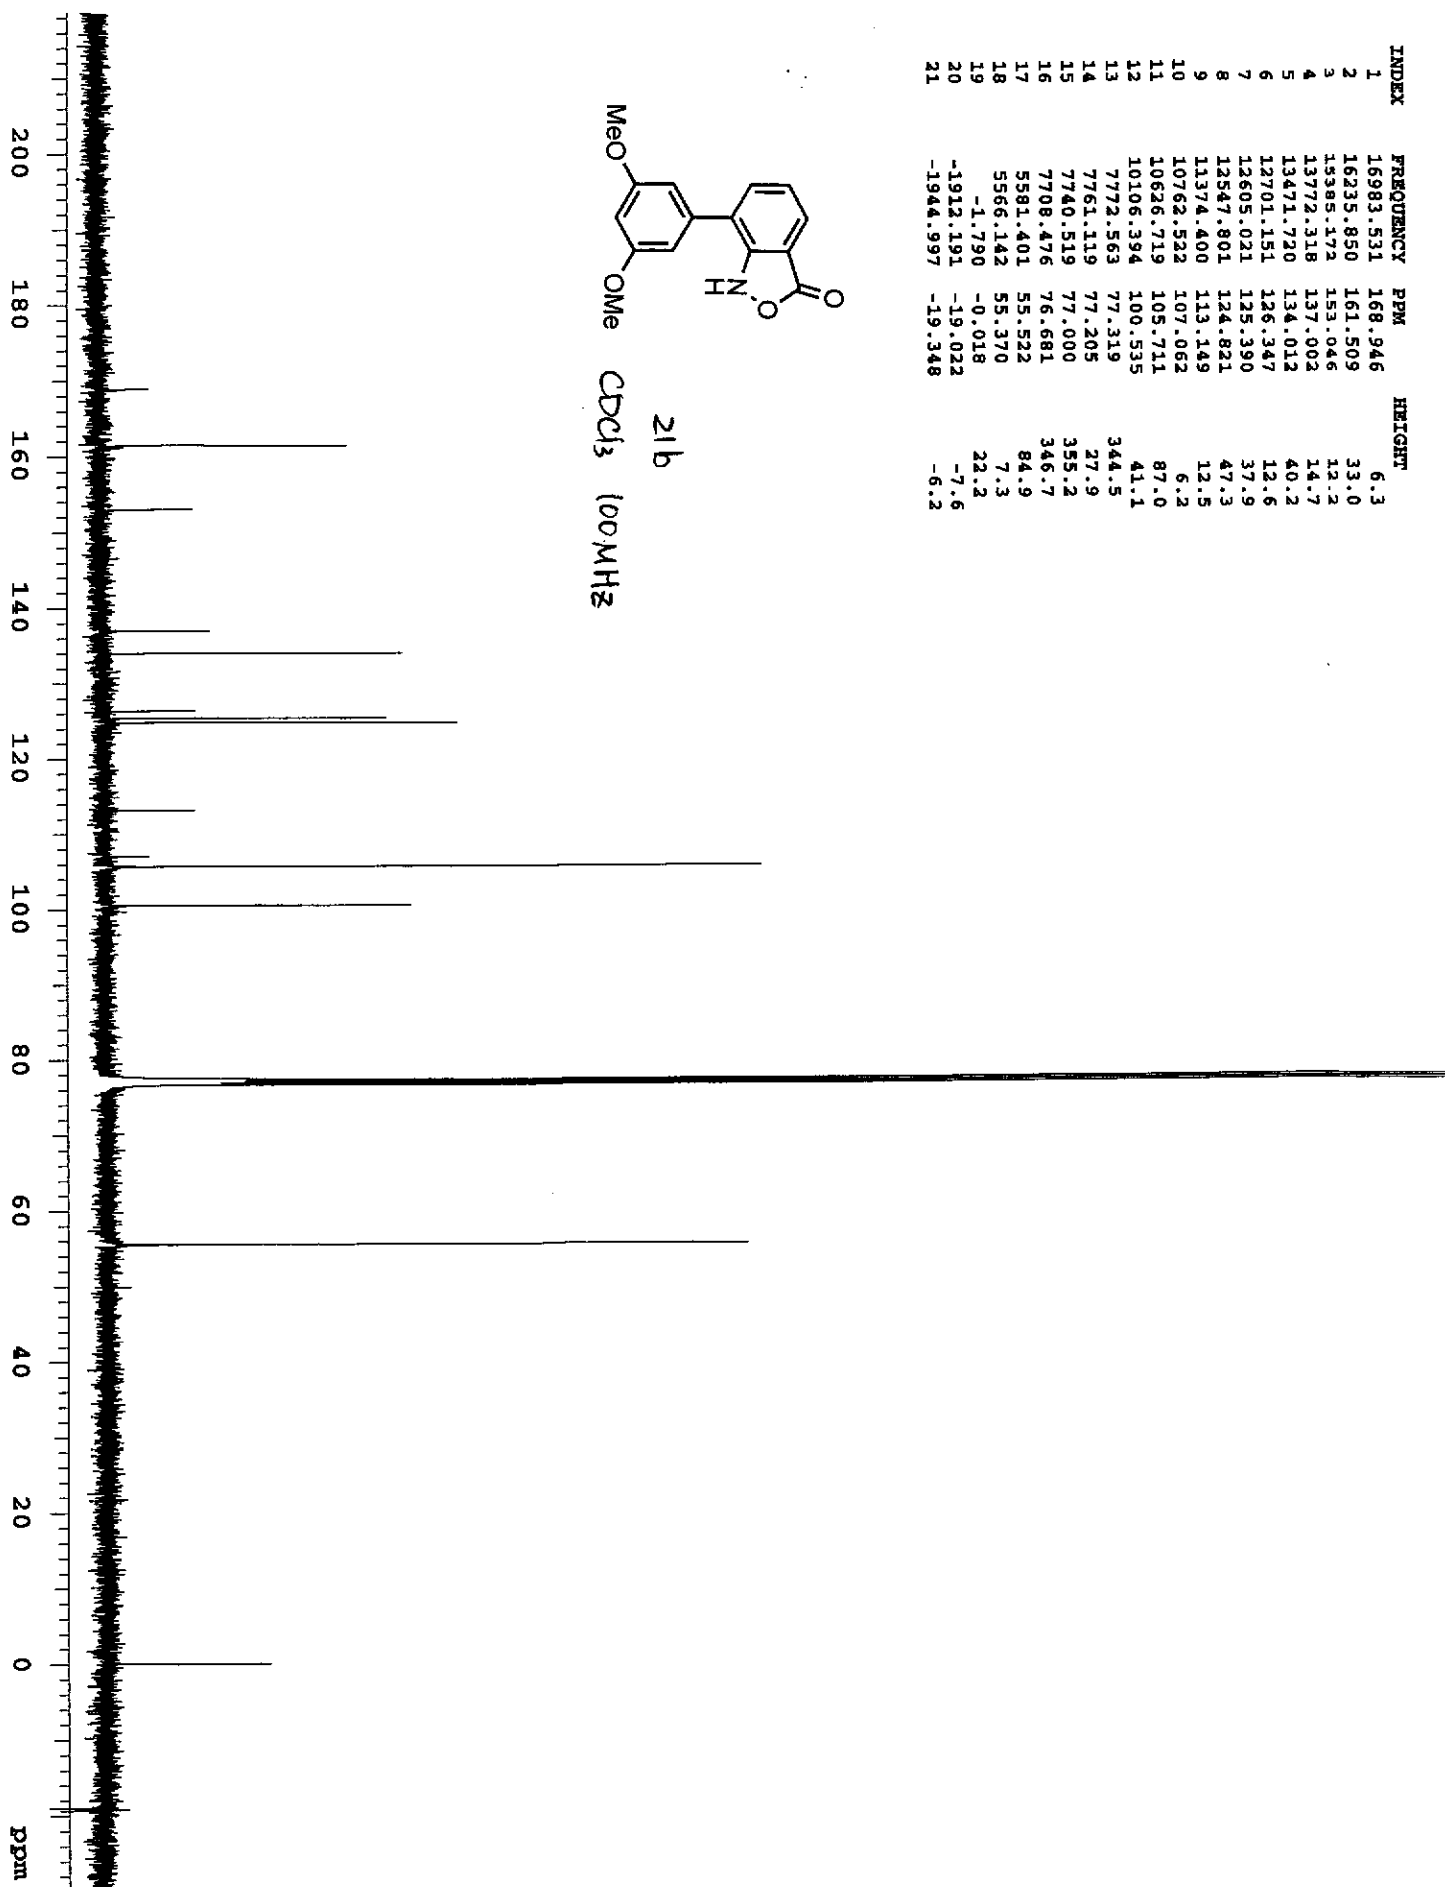

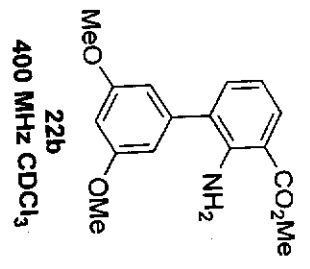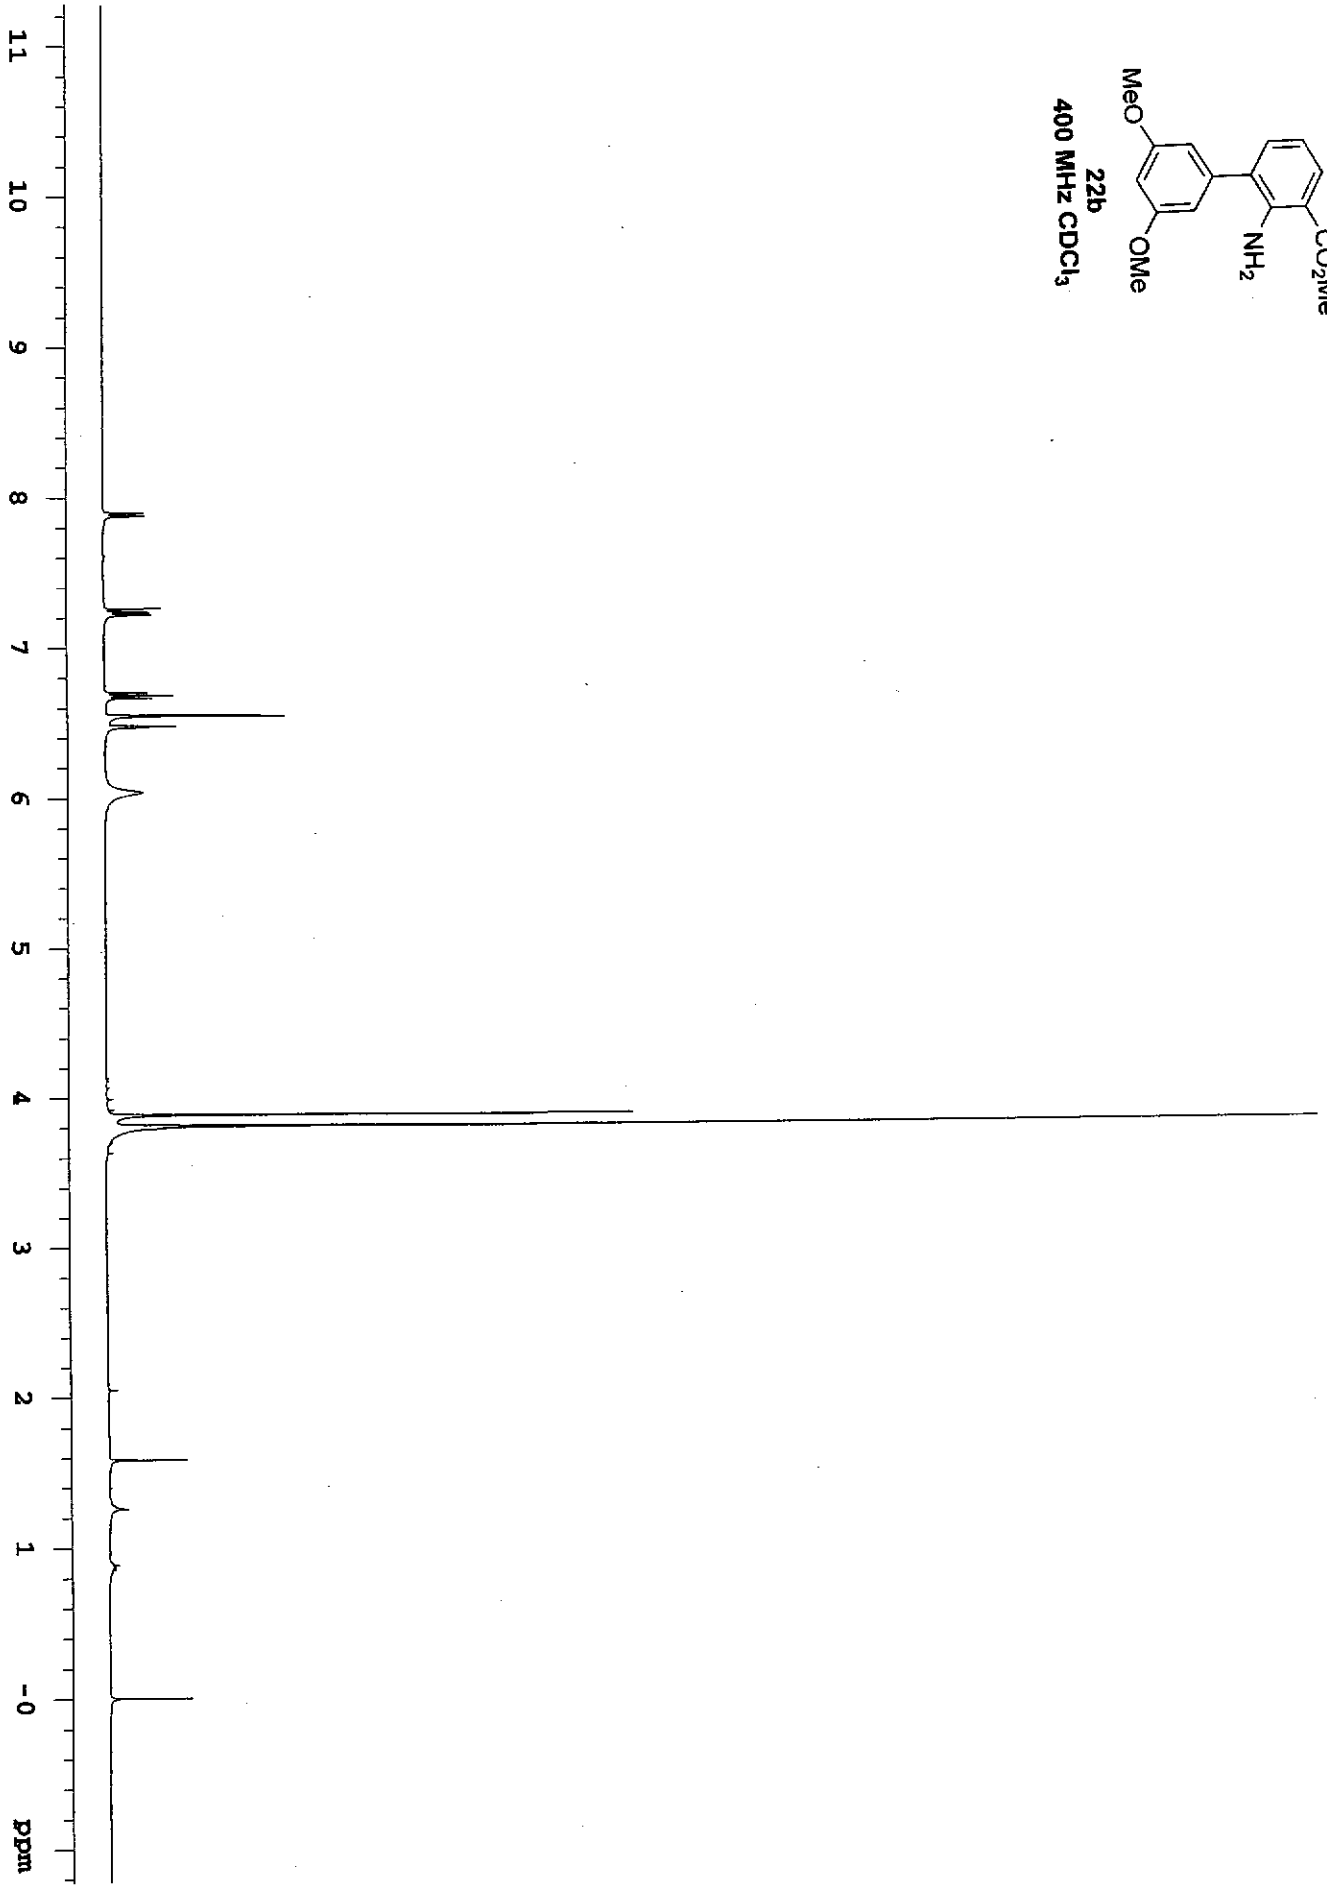

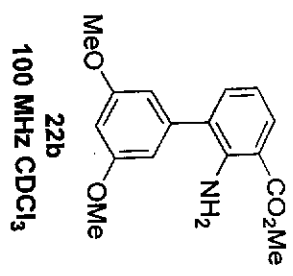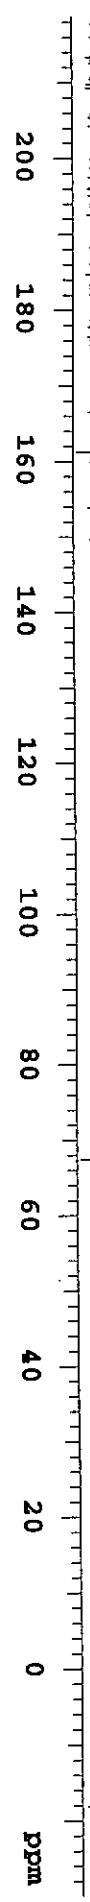

Quon-4-29-5

S13

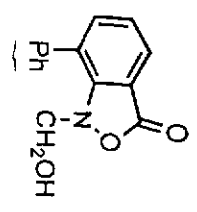

13

CDCl<sub>3</sub> 400 MHz

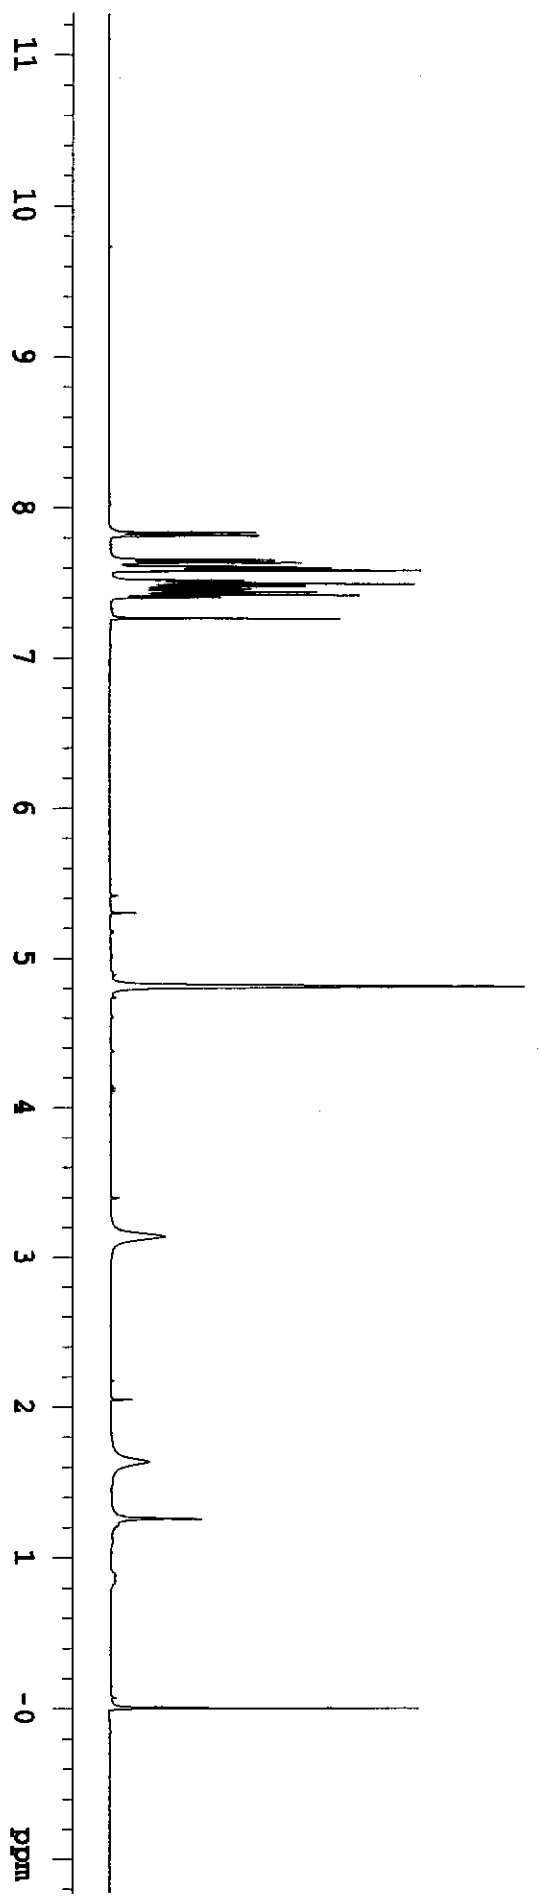

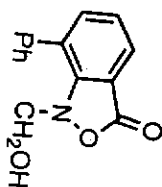

CDCl<sub>3</sub> 100 MHz

| INDEX | FREQUENCY | PPM     | HEIGHT   |
|-------|-----------|---------|----------|
| 1     | 16948.716 | 168.600 | 10.8 ✓   |
| 2     | 15291.561 | 152.115 | 9.4 ✓    |
| 3     | 13678.658 | 136.071 | 14.8 ✓   |
| 4     | 13670.266 | 135.987 | 49.2 (c) |
| 5     | 12988.940 | 129.209 | 99.6 (c) |
| 6     | 12945.451 | 128.777 | 52.7     |
| 7     | 12889.755 | 128.223 | 99.1 (c) |
| 8     | 12881.362 | 128.139 | 15.9     |
| 9     | 12663.918 | 125.976 | 48.4     |
| 10    | 12533.451 | 124.678 | 53.4     |
| 11    | 11688.851 | 116.277 | 16.5 ✓   |
| 12    | 7772.864  | 77.319  | 163.8    |
| 13    | 7760.356  | 77.197  | 8.6      |
| 14    | 7740.519  | 77.000  | 171.1    |
| 15    | 7708.475  | 76.581  | 169.8    |
| 16    | 7451.356  | 74.124  | 51.7     |
| 17    | 2.190     | -0.028  | 6.0      |

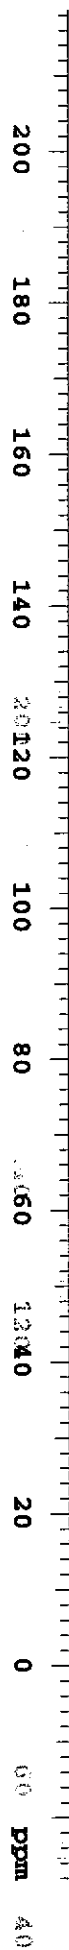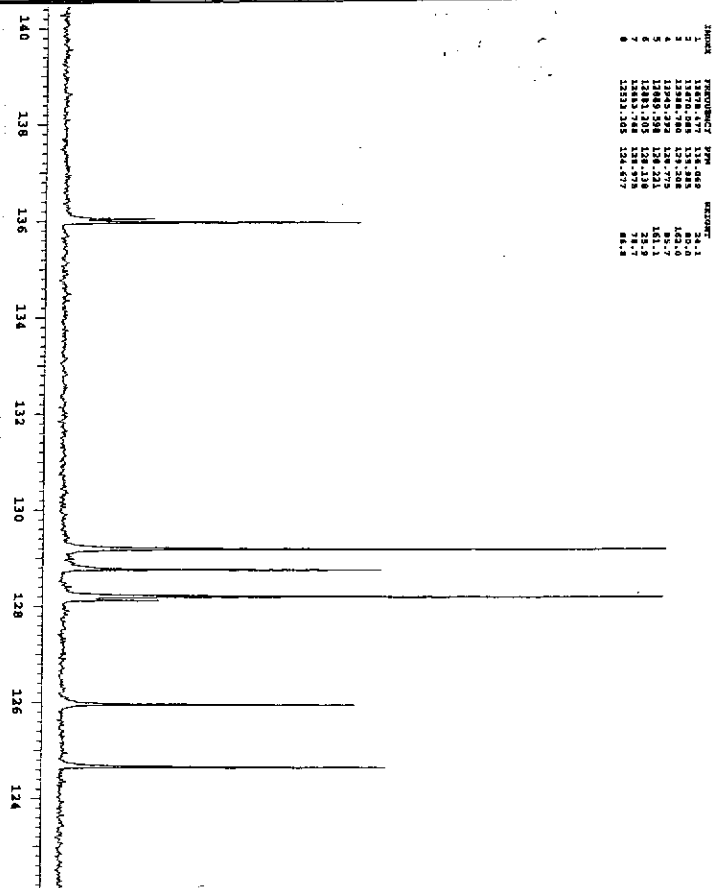

| INDEX | FREQUENCY | PPM     | HEIGHT |
|-------|-----------|---------|--------|
| 1     | 1378.617  | 138.668 | 24.1   |
| 2     | 1378.617  | 138.668 | 162.0  |
| 3     | 1368.780  | 137.208 | 181.7  |
| 4     | 1368.780  | 137.208 | 21.9   |
| 5     | 1360.772  | 136.772 | 78.7   |
| 6     | 1360.772  | 136.772 | 78.7   |
| 7     | 1358.768  | 136.578 | 88.8   |
| 8     | 1358.768  | 136.578 | 88.8   |

Quan - 4-21-2

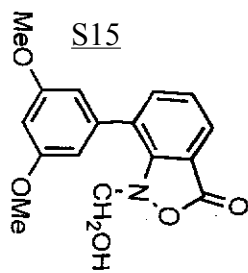

23b

CDCl<sub>3</sub> 400 MHz

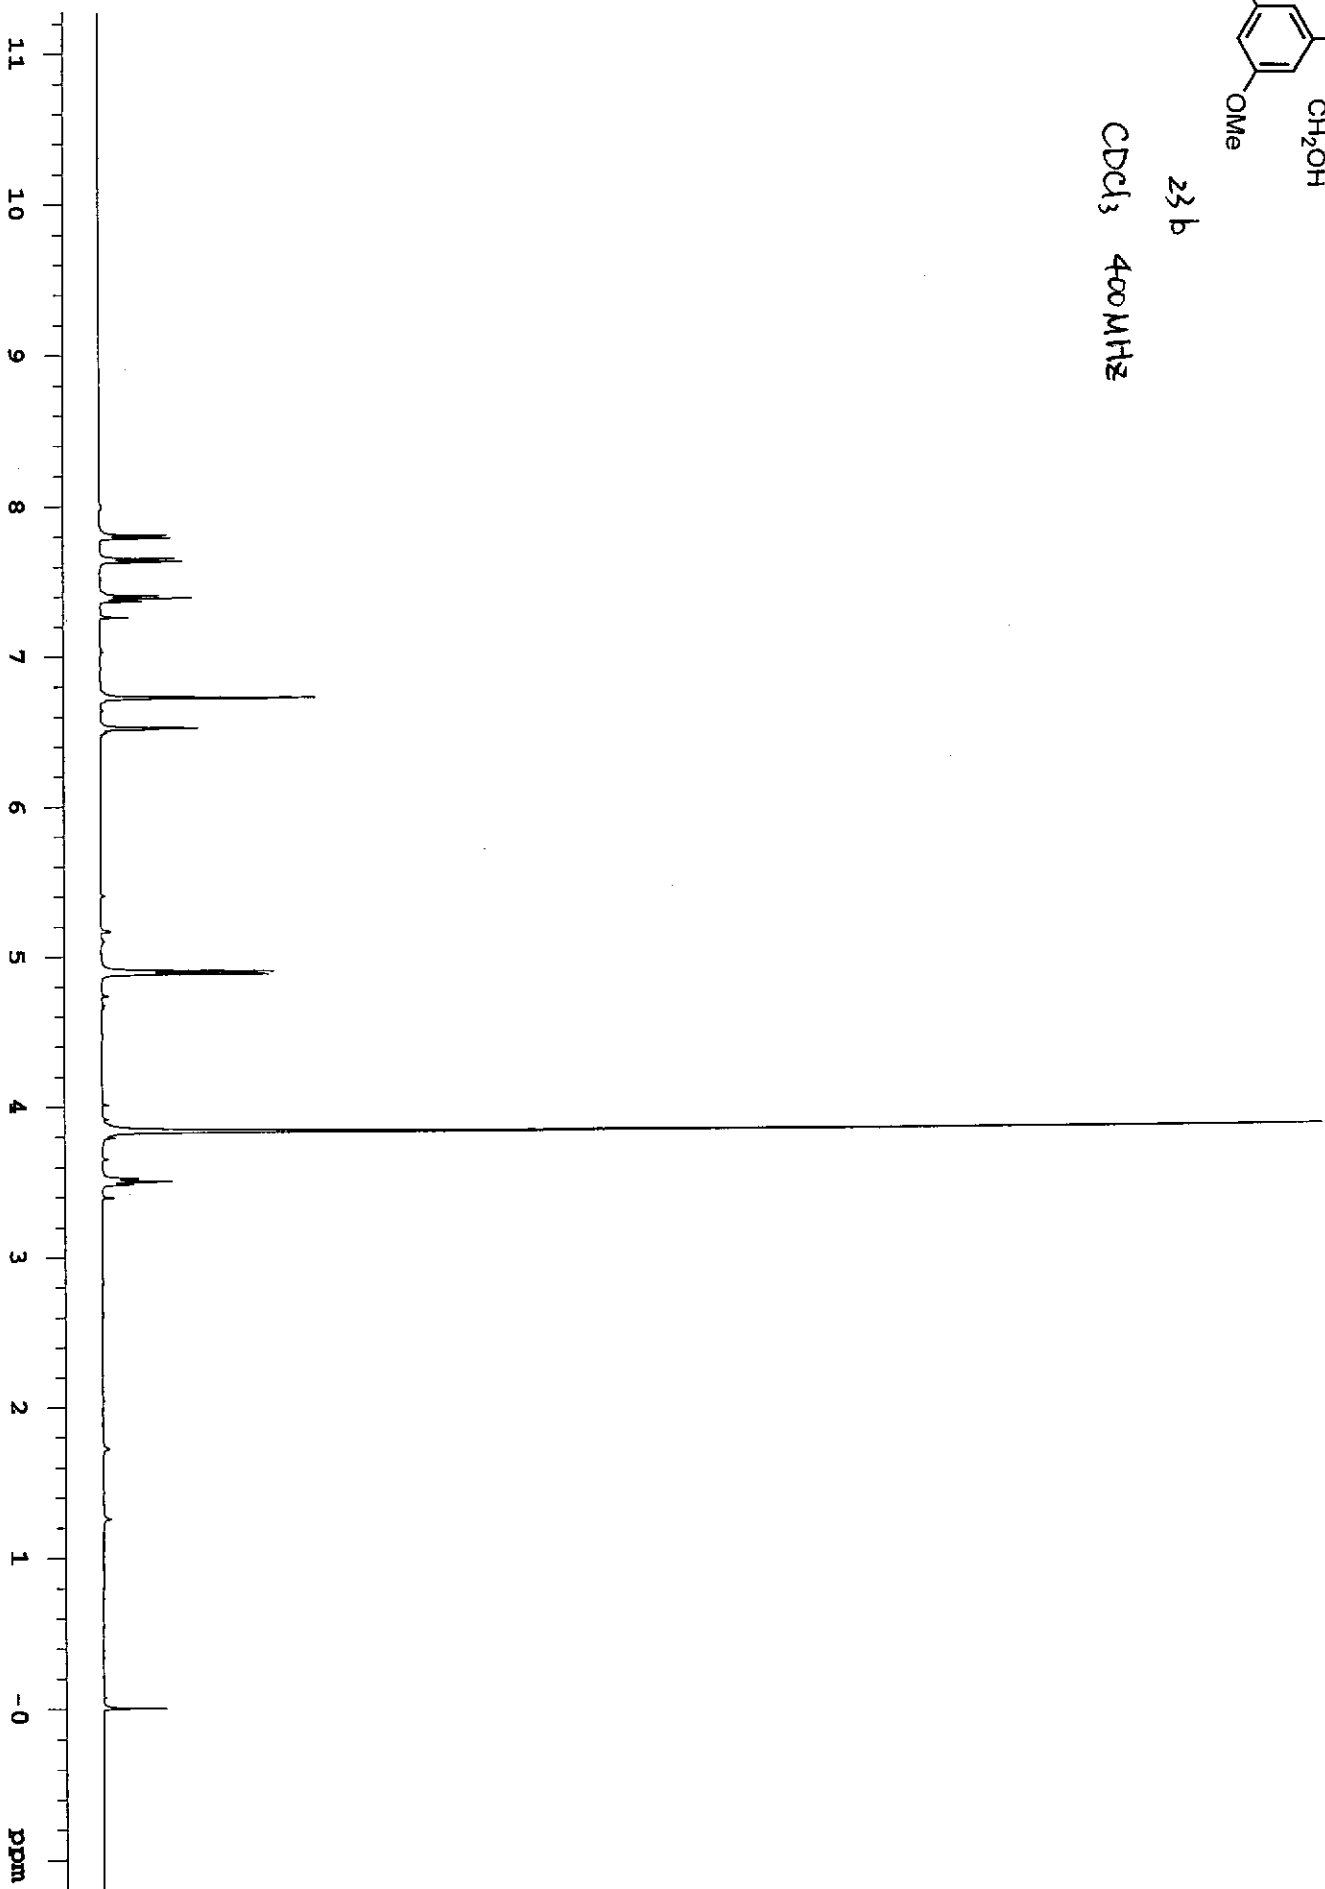

| INDEX | FREQUENCY | PPM     | HEIGHT     |
|-------|-----------|---------|------------|
| 1     | 16959.726 | 168.709 | 24.5       |
| 2     | 16208.971 | 161.241 | 87.9 - 2H  |
| 3     | 15385.786 | 152.058 | 29.6       |
| 4     | 13863.623 | 137.911 | 30.7       |
| 5     | 13645.416 | 135.740 | 83.3       |
| 6     | 12870.246 | 128.029 | 26.9       |
| 7     | 12645.935 | 125.797 | 80.3       |
| 8     | 12542.935 | 124.773 | 80.5       |
| 9     | 11681.550 | 116.204 | 26.4       |
| 10    | 10679.780 | 106.239 | 143.7 - 2H |
| 11    | 10116.713 | 100.638 | 78.5       |
| 12    | 7772.129  | 77.314  | 125.6      |
| 13    | 7740.084  | 76.996  | 128.9      |
| 14    | 7708.040  | 76.677  | 124.8      |
| 15    | 7470.759  | 74.317  | 61.7       |
| 16    | 5578.611  | 55.494  | 162.0 - 2H |

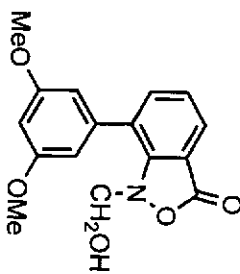

23b  
CDCl<sub>3</sub>, 100 MHz

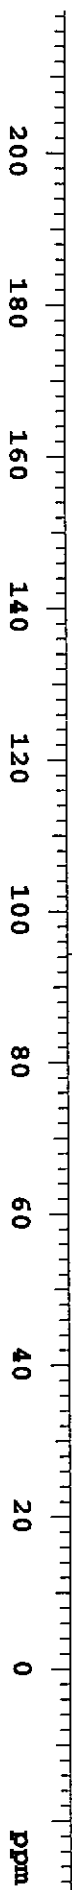



Quan - 4-22-3

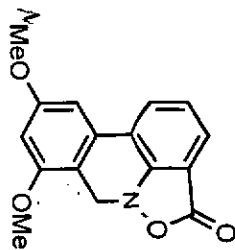

24b

CDCl<sub>3</sub> 400MHz

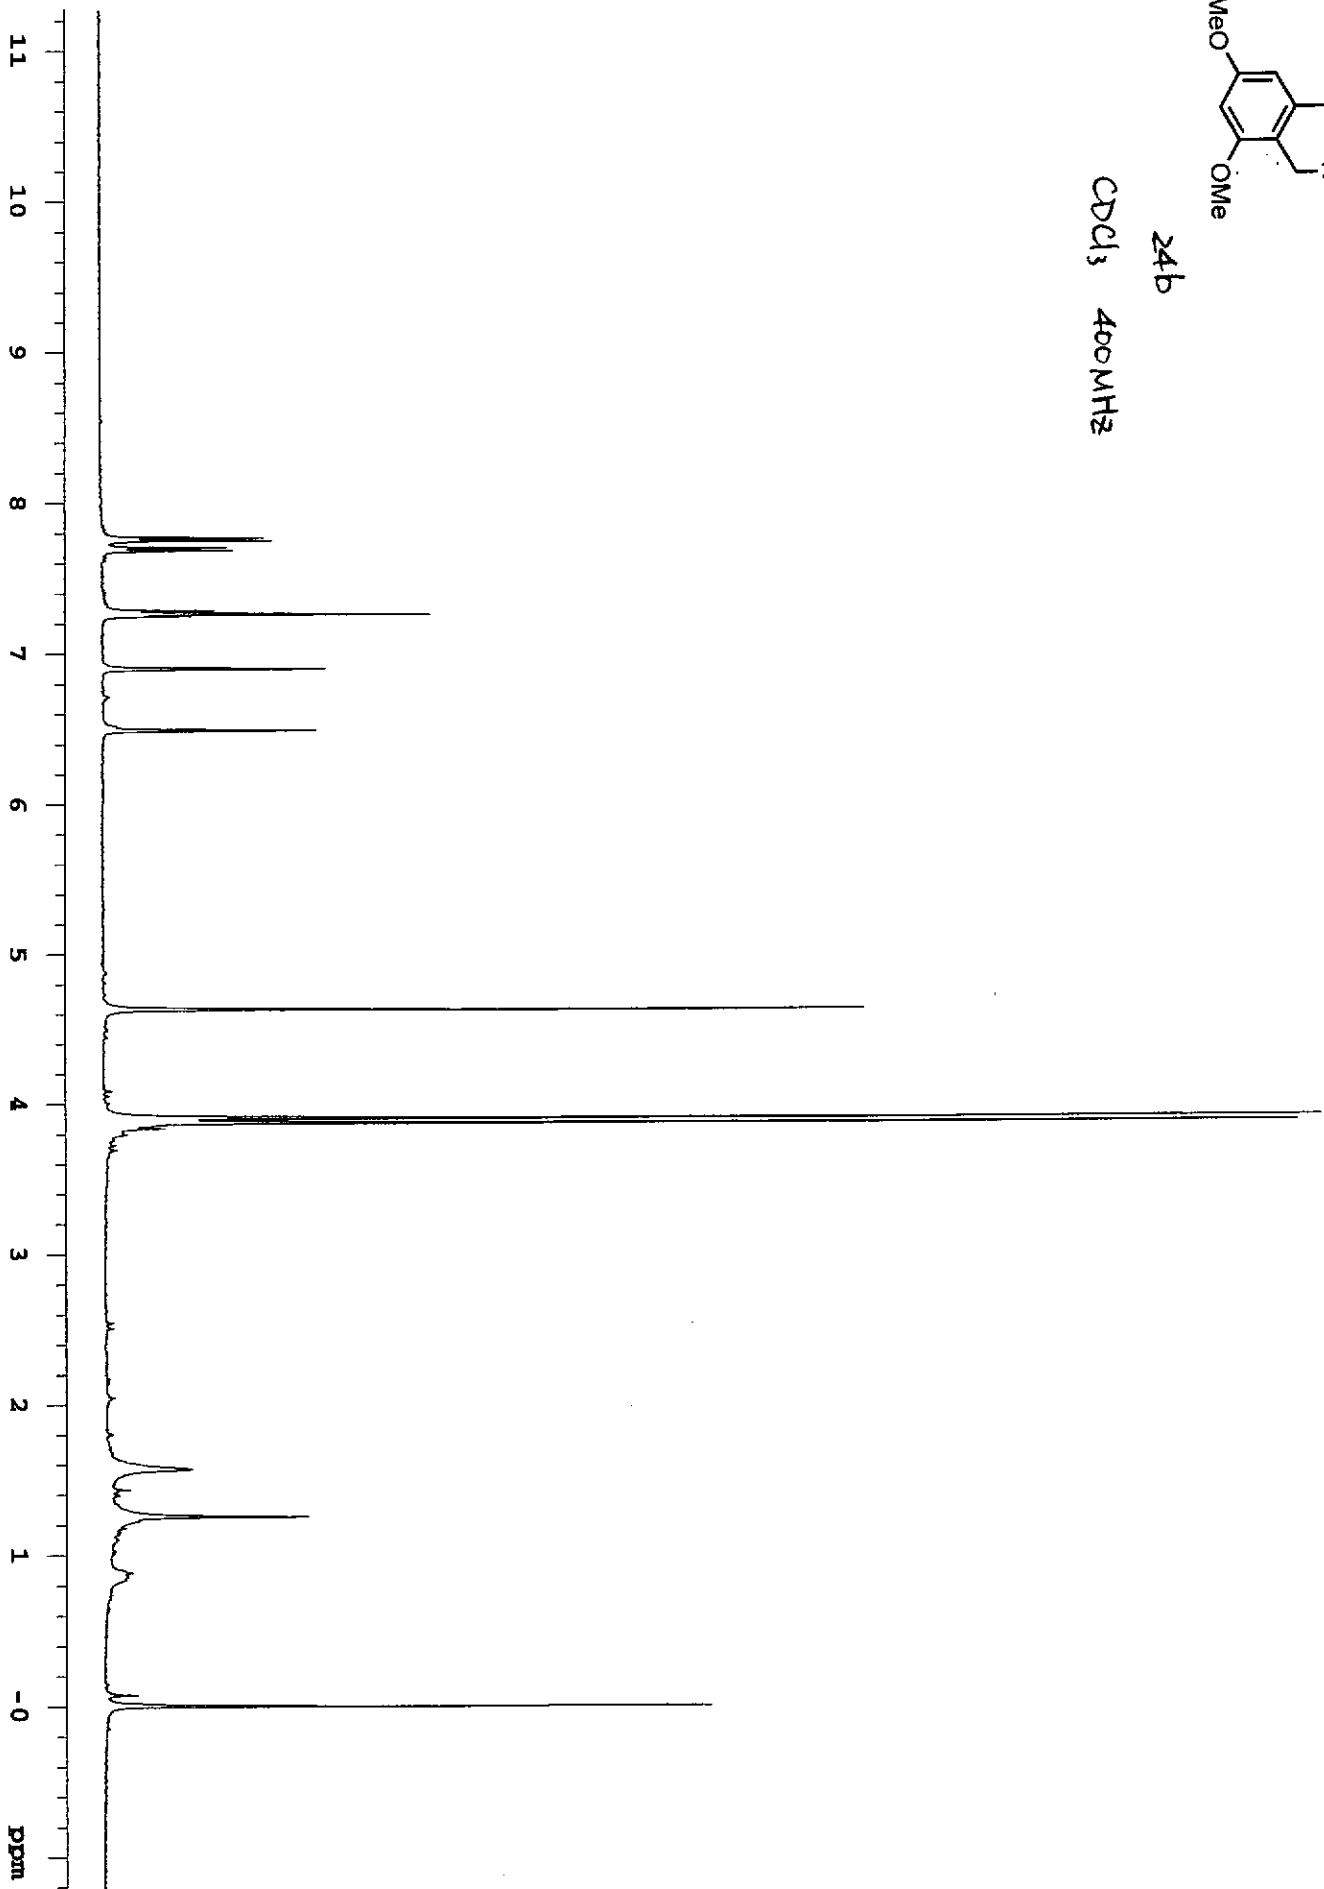

| INDEX | FREQUENCY | PPM     | HEIGHT |
|-------|-----------|---------|--------|
| 1     | 16892.585 | 168.042 | 9.8    |
| 2     | 16190.660 | 161.059 | 23.7   |
| 3     | 15858.771 | 157.758 | 21.8   |
| 4     | 15729.067 | 156.467 | 13.8   |
| 5     | 13138.046 | 130.693 | 19.0   |
| 6     | 12774.112 | 127.072 | 68.3   |
| 7     | 12555.905 | 124.902 | 70.1   |
| 8     | 12513.942 | 124.484 | 70.3   |
| 9     | 12221.727 | 121.578 | 16.2   |
| 10    | 11283.283 | 112.242 | 22.0   |
| 11    | 11133.743 | 110.755 | 13.5   |
| 12    | 9986.247  | 99.340  | 63.9   |
| 13    | 9948.098  | 98.960  | 74.8   |
| 14    | 7772.129  | 77.314  | 386.7  |
| 15    | 7759.921  | 77.193  | 40.5   |
| 16    | 7740.084  | 76.996  | 400.3  |
| 17    | 7708.040  | 76.677  | 395.1  |
| 18    | 5597.685  | 55.684  | 73.4   |
| 19    | 5584.715  | 55.555  | 70.2   |
| 20    | 4897.285  | 48.716  | 75.3   |
| 21    | 2984.538  | 29.689  | 16.0   |
| 22    | -2.462    | -0.024  | 25.4   |
| 23    | -1924.365 | -19.143 | 8.3    |

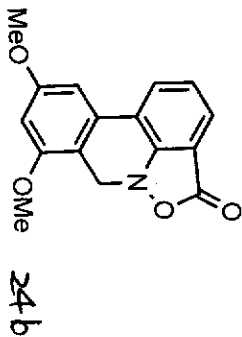

CDCl<sub>3</sub> 100 MHz

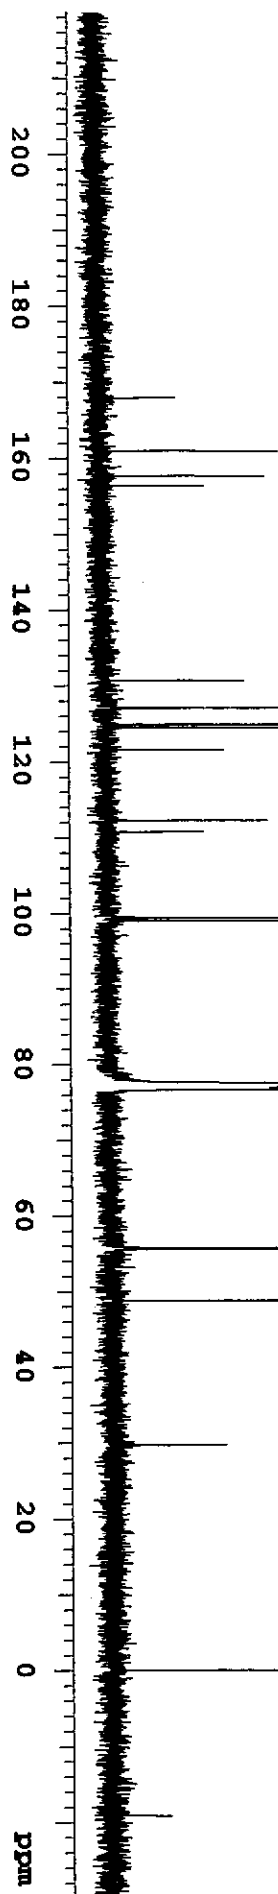

QVAM-4-65-3

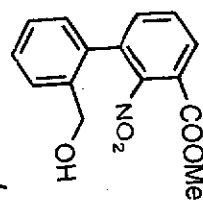

26a

CDCl<sub>3</sub> 400 MHz

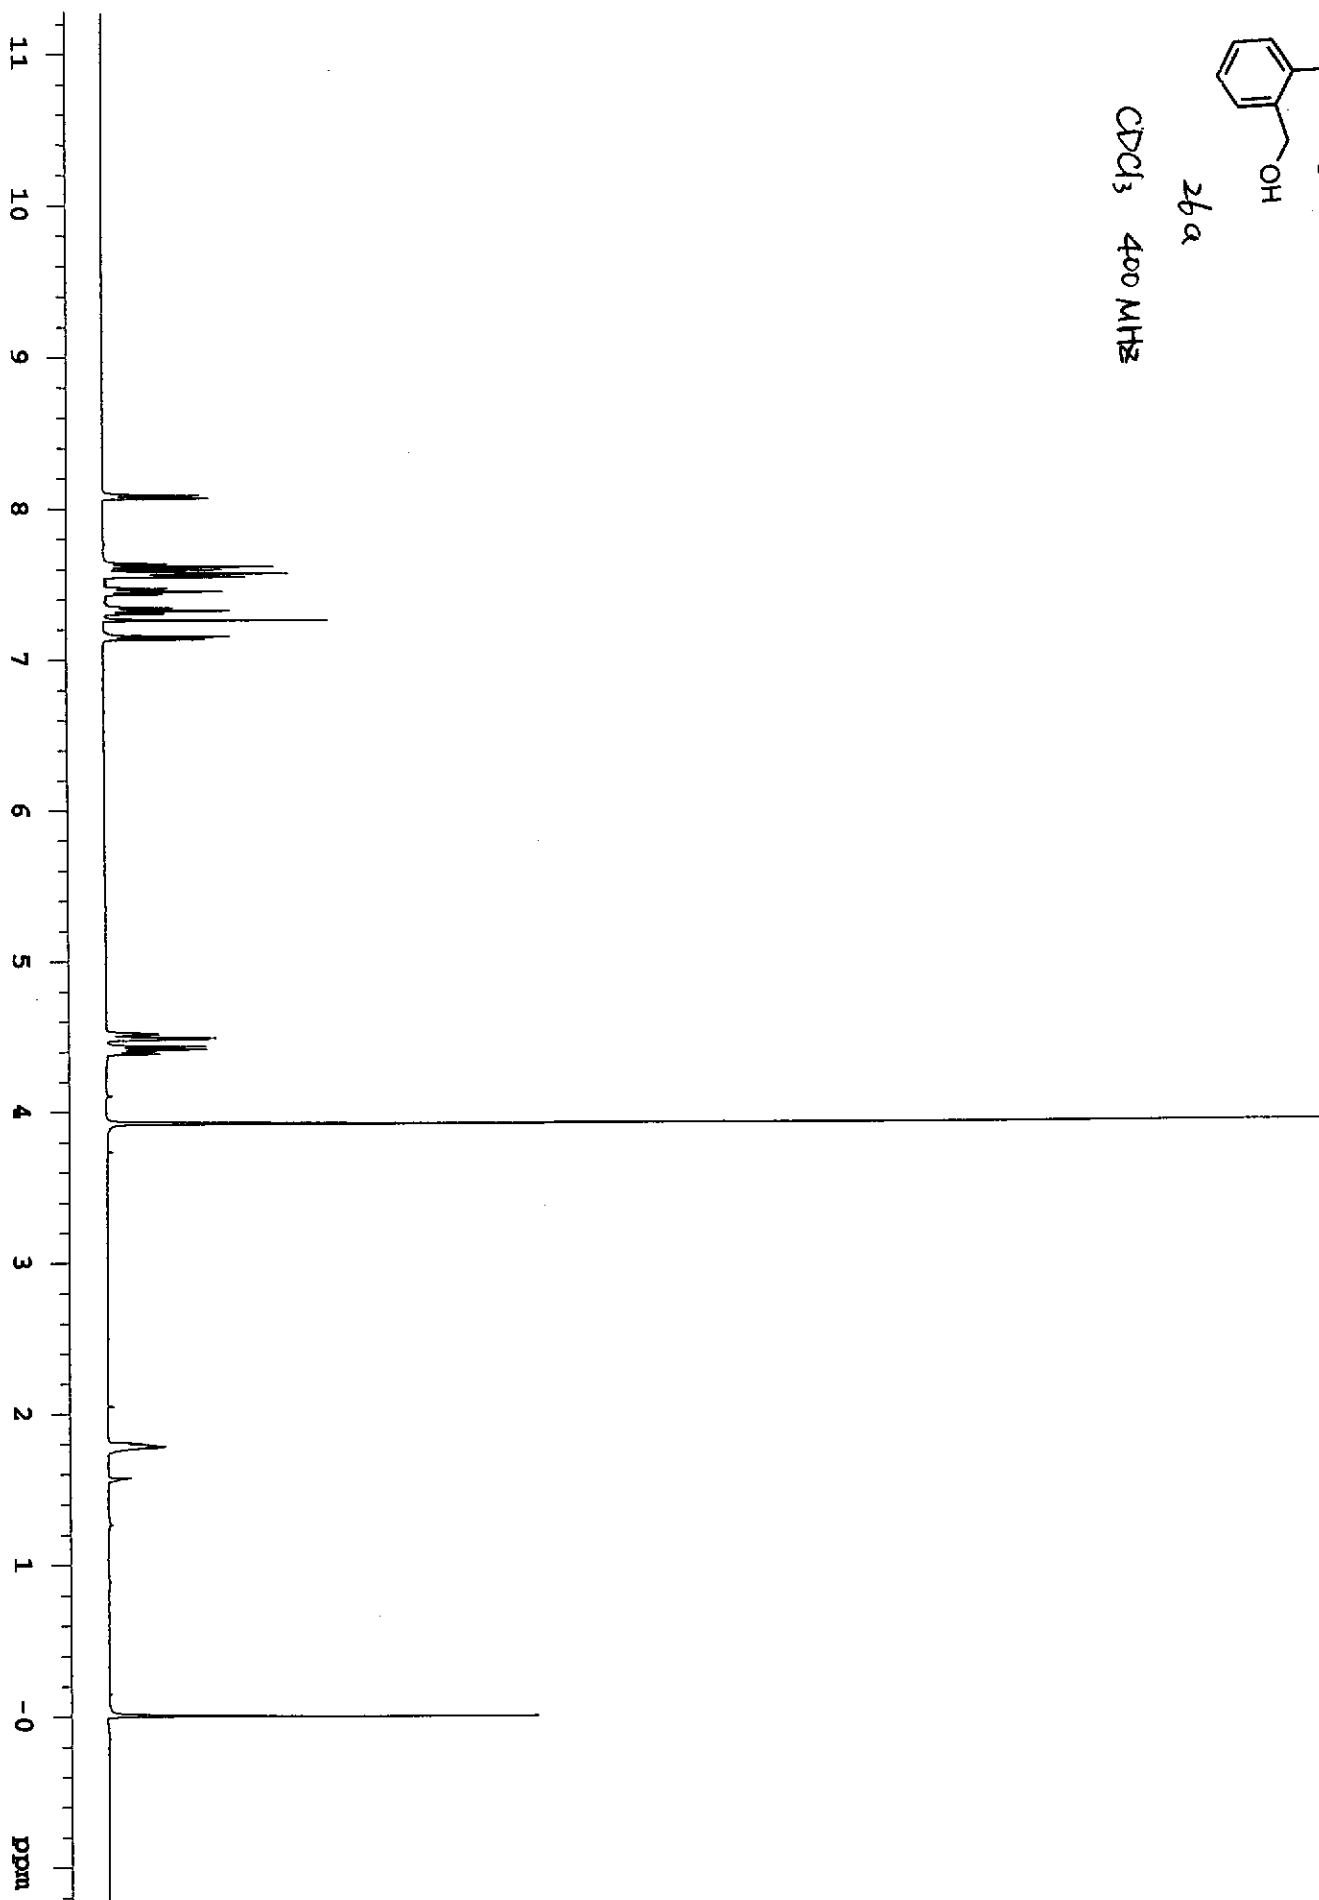

Qvan-4-65-3-carben-1

| INDEX | FREQUENCY | PPM     | HEIGHT |
|-------|-----------|---------|--------|
| 1     | 16448.541 | 163.624 | 10.8   |
| 2     | 13978.068 | 139.049 | 15.5   |
| 3     | 13623.290 | 135.520 | 52.1   |
| 4     | 13450.860 | 133.804 | 8.9    |
| 5     | 13412.712 | 133.425 | 12.0   |
| 6     | 13122.786 | 130.541 | 56.4   |
| 7     | 13038.861 | 129.706 | 54.9   |
| 8     | 13030.468 | 129.623 | 56.4   |
| 9     | 13006.816 | 129.387 | 49.9   |
| 10    | 12939.675 | 128.719 | 57.2   |
| 11    | 12835.149 | 127.680 | 51.0   |
| 12    | 12359.824 | 122.951 | 14.5   |
| 13    | 7772.129  | 77.314  | 155.9  |
| 14    | 7740.084  | 76.996  | 162.0  |
| 15    | 7708.040  | 76.677  | 158.6  |
| 16    | 6328.603  | 62.955  | 44.5   |
| 17    | 5343.618  | 53.156  | 29.8   |
| 18    | -2.462    | -0.024  | 19.0   |

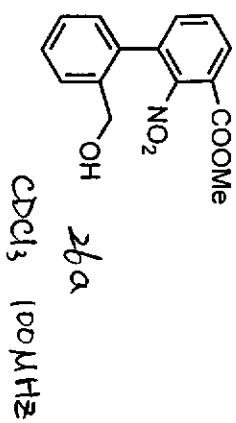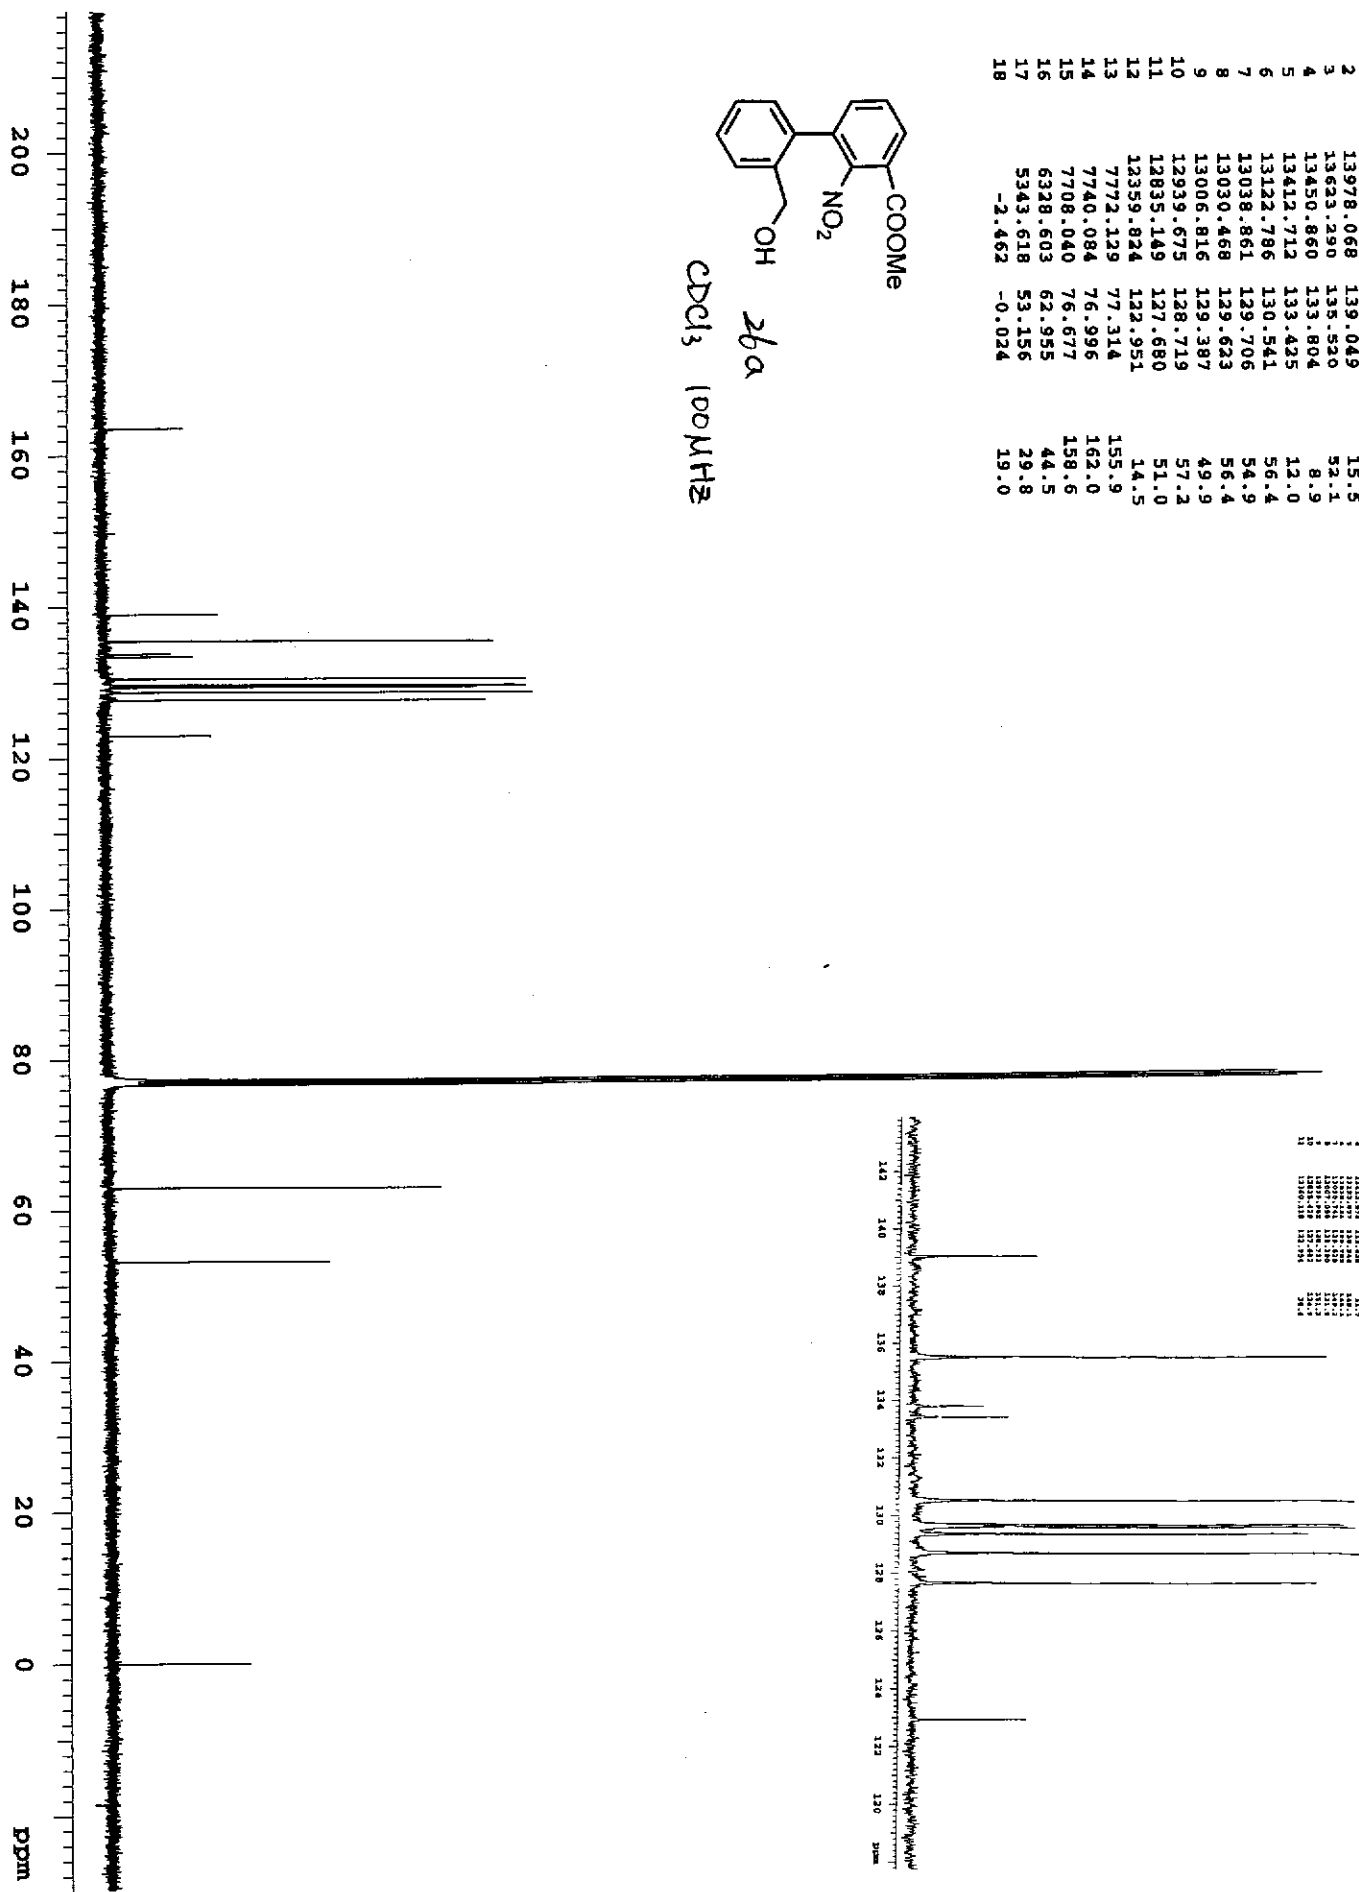

| INDEX | FREQUENCY | PPM     | HEIGHT |
|-------|-----------|---------|--------|
| 1     | 16448.541 | 163.624 | 10.8   |
| 2     | 13978.068 | 139.049 | 15.5   |
| 3     | 13623.290 | 135.520 | 52.1   |
| 4     | 13450.860 | 133.804 | 8.9    |
| 5     | 13412.712 | 133.425 | 12.0   |
| 6     | 13122.786 | 130.541 | 56.4   |
| 7     | 13038.861 | 129.706 | 54.9   |
| 8     | 13030.468 | 129.623 | 56.4   |
| 9     | 13006.816 | 129.387 | 49.9   |
| 10    | 12939.675 | 128.719 | 57.2   |
| 11    | 12835.149 | 127.680 | 51.0   |
| 12    | 12359.824 | 122.951 | 14.5   |
| 13    | 7772.129  | 77.314  | 155.9  |
| 14    | 7740.084  | 76.996  | 162.0  |
| 15    | 7708.040  | 76.677  | 158.6  |
| 16    | 6328.603  | 62.955  | 44.5   |
| 17    | 5343.618  | 53.156  | 29.8   |
| 18    | -2.462    | -0.024  | 19.0   |

Quan - 4-72-1

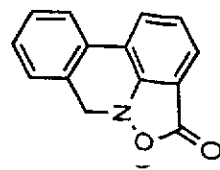

12

CDCl<sub>3</sub> 400 MHz

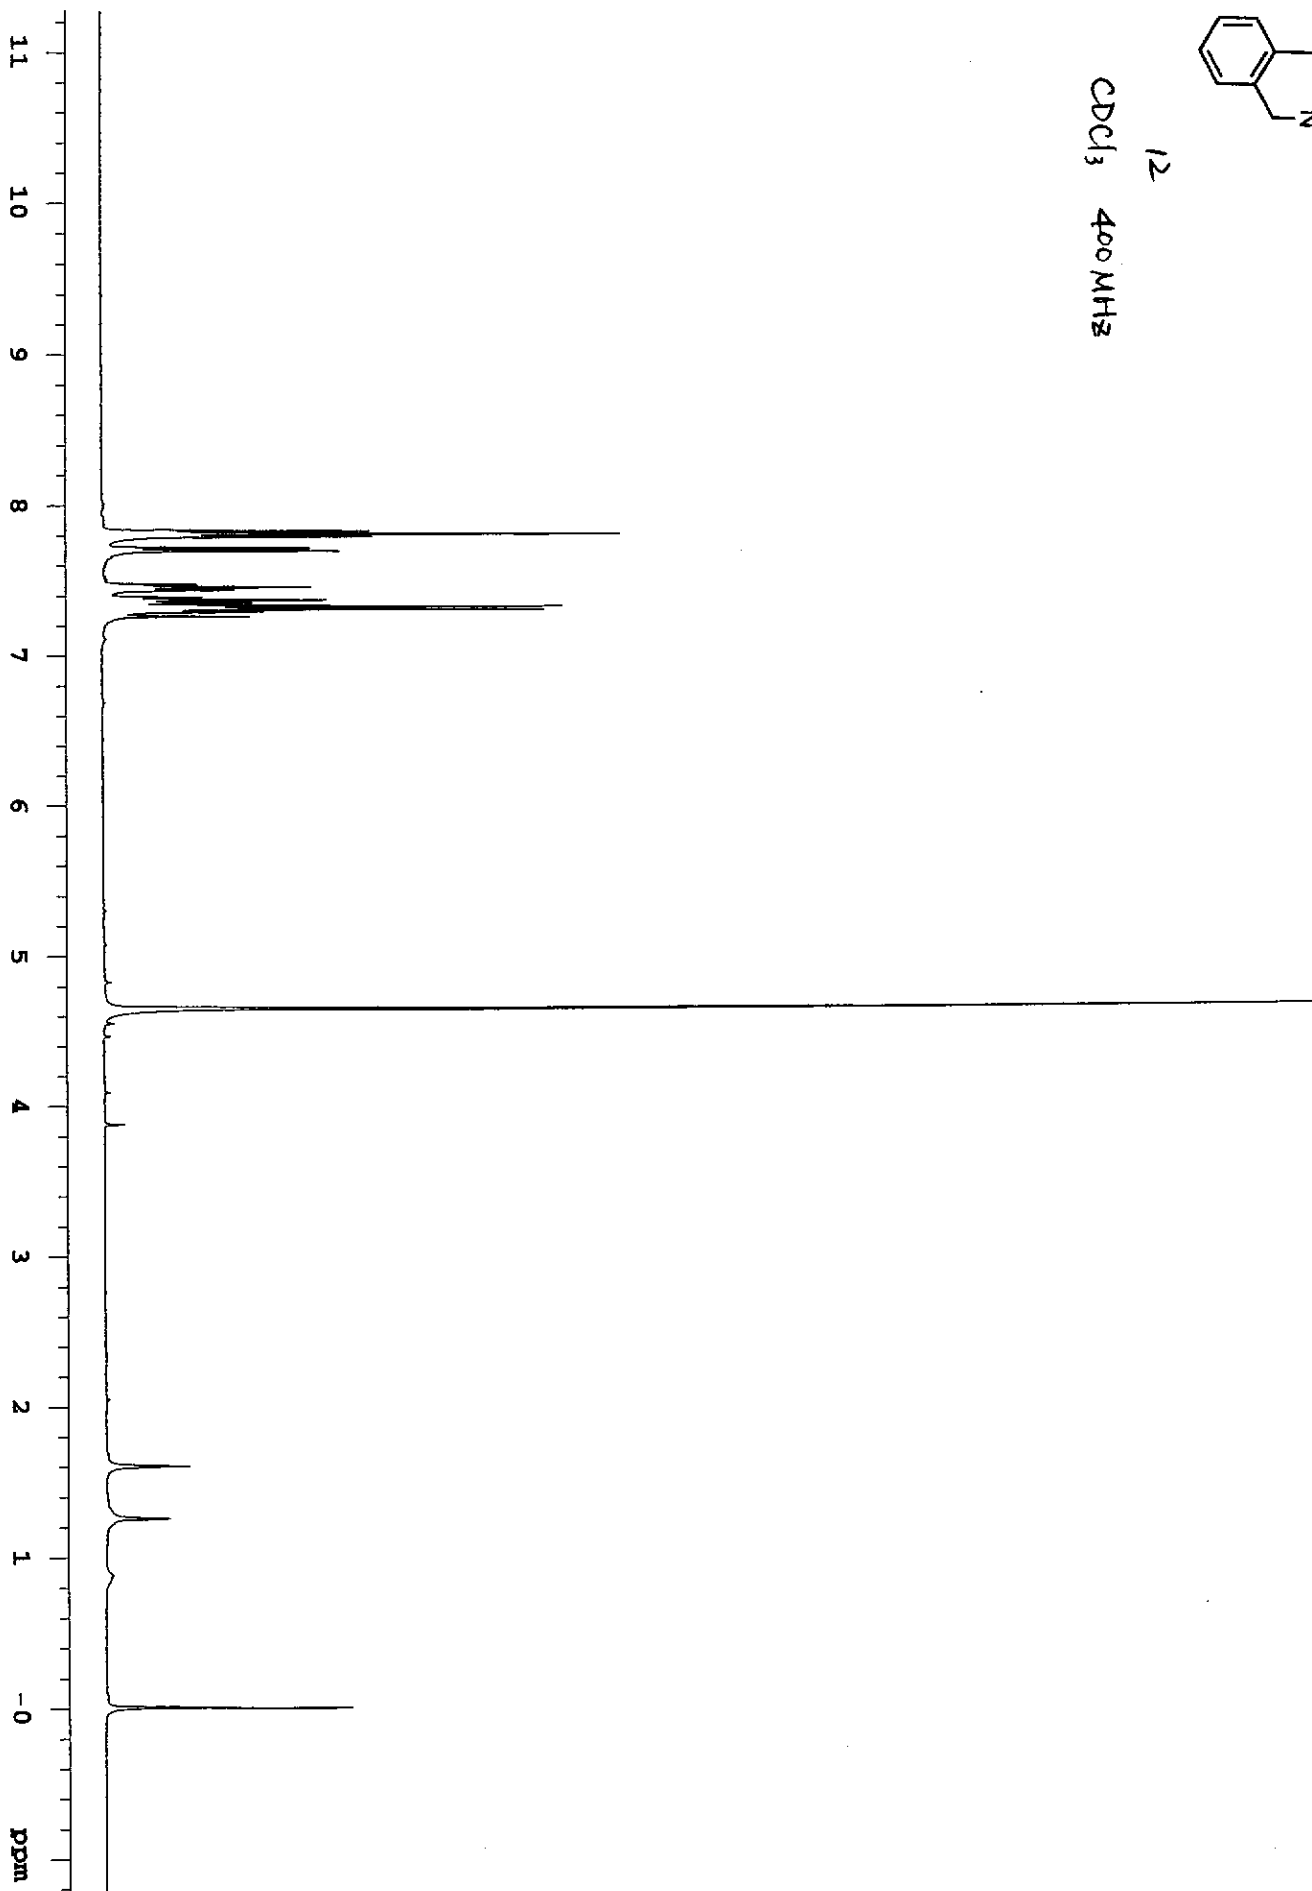

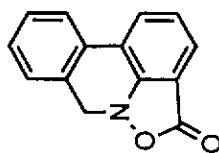

12

CDCl<sub>3</sub> 100MHz

| INDEX | FREQUENCY | PPM     | HEIGHT |
|-------|-----------|---------|--------|
| 1     | 16877.761 | 167.894 | 11.8   |
| 2     | 15727.976 | 156.456 | 11.6   |
| 3     | 13184.258 | 131.152 | 19.1   |
| 4     | 13002.673 | 129.346 | 54.7   |
| 5     | 12997.333 | 129.293 | 63.5   |
| 6     | 12987.414 | 129.194 | 17.7   |
| 7     | 12908.829 | 128.413 | 56.0   |
| 8     | 12766.918 | 127.001 | 60.1   |
| 9     | 12605.170 | 125.392 | 48.8   |
| 10    | 12501.407 | 124.360 | 64.2   |
| 11    | 12380.096 | 123.153 | 57.1   |
| 12    | 12230.555 | 121.665 | 13.6   |
| 13    | 11170.800 | 111.123 | 13.0   |
| 14    | 7772.564  | 77.319  | 161.4  |
| 15    | 7761.119  | 77.205  | 9.0    |
| 16    | 7740.519  | 77.000  | 162.0  |
| 17    | 7709.338  | 76.689  | 157.3  |
| 18    | 5559.972  | 55.309  | 62.7   |

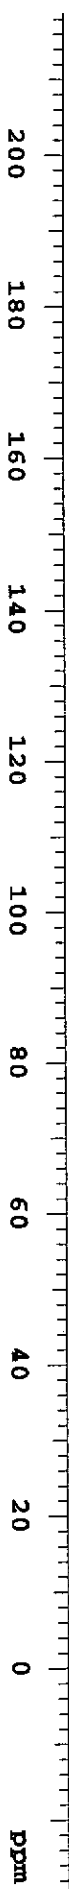

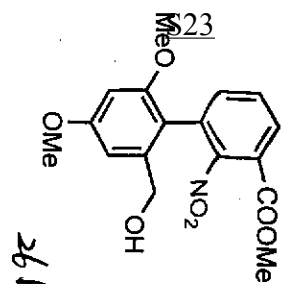

CDCl<sub>3</sub>, 400MHz

266

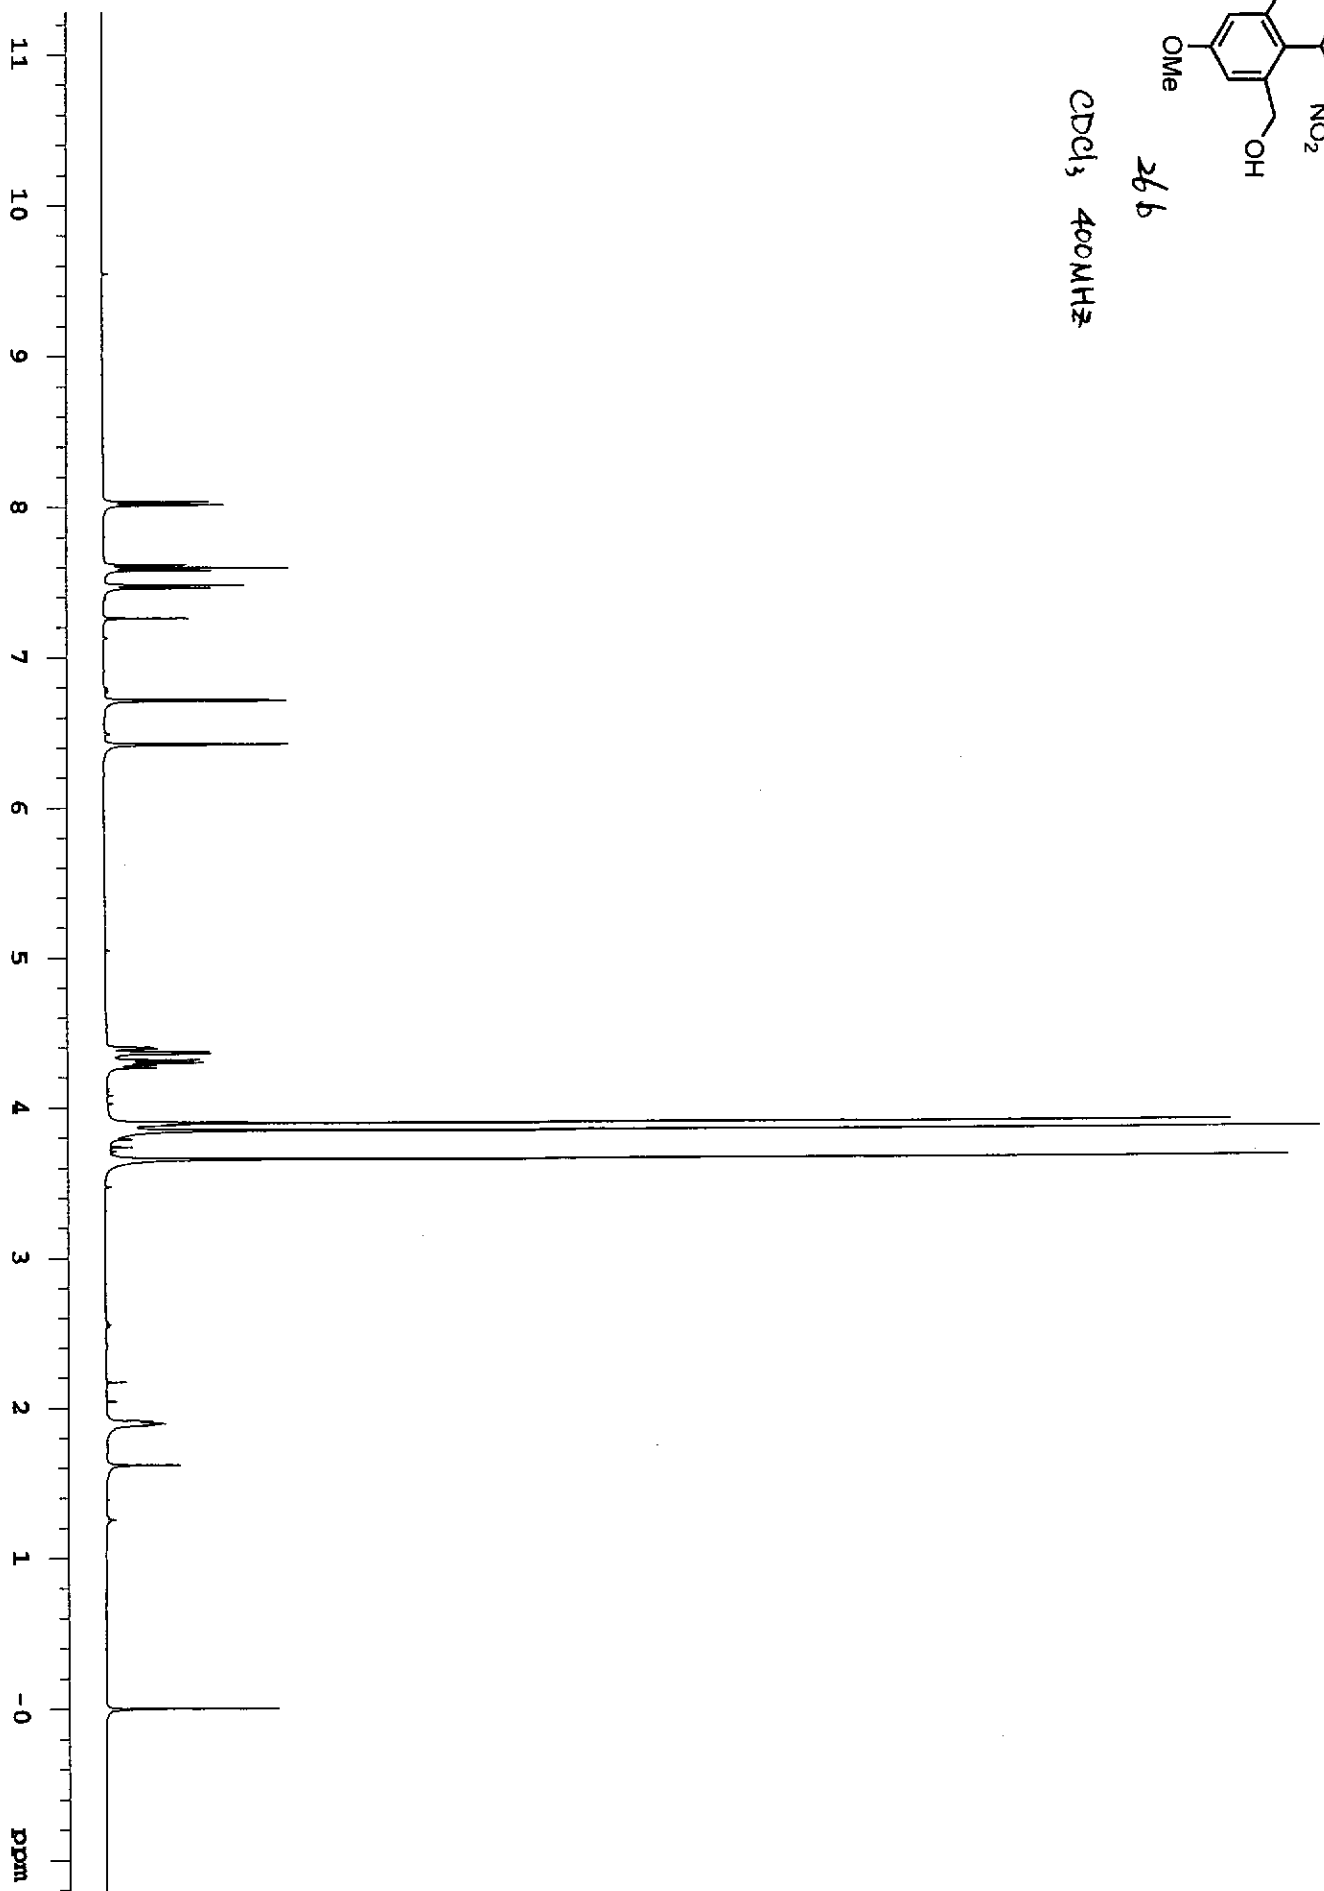

CDCl<sub>3</sub> - 4-111-2 - carbem

| INDEX | FREQUENCY | PPM     | HEIGHT |
|-------|-----------|---------|--------|
| 1     | 16482.874 | 163.966 | 27.7   |
| 2     | 16240.252 | 161.552 | 32.1   |
| 3     | 15883.949 | 158.008 | 44.8   |
| 4     | 15137.771 | 150.585 | 5.7    |
| 5     | 14246.631 | 141.721 | 37.0   |
| 6     | 13743.838 | 136.719 | 109.1  |
| 7     | 13126.601 | 130.579 | 38.5   |
| 8     | 13093.794 | 130.253 | 108.3  |
| 9     | 13064.038 | 129.957 | 106.0  |
| 10    | 12394.157 | 123.293 | 31.8   |
| 11    | 11531.246 | 114.709 | 20.0   |
| 12    | 10474.543 | 104.197 | 96.6   |
| 13    | 9851.965  | 98.004  | 113.1  |
| 14    | 7772.129  | 77.314  | 151.1  |
| 15    | 7740.084  | 76.996  | 162.0  |
| 16    | 7708.040  | 76.677  | 161.6  |
| 17    | 6322.500  | 62.894  | 83.8   |
| 18    | 5606.841  | 55.775  | 96.3   |
| 19    | 5569.455  | 55.403  | 84.7   |
| 20    | 5331.411  | 53.035  | 80.1   |
| 21    | -3.987    | -0.040  | 11.2   |

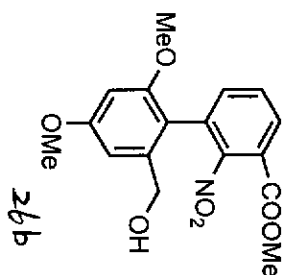

CDCl<sub>3</sub> 100MHz  
26b

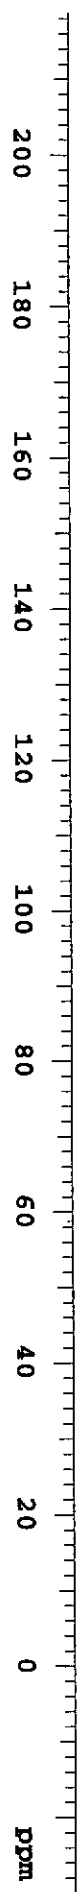



Quan - 4-113-2

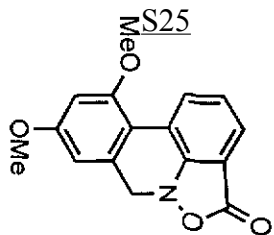

CDCl<sub>3</sub> 400MHz  
28b

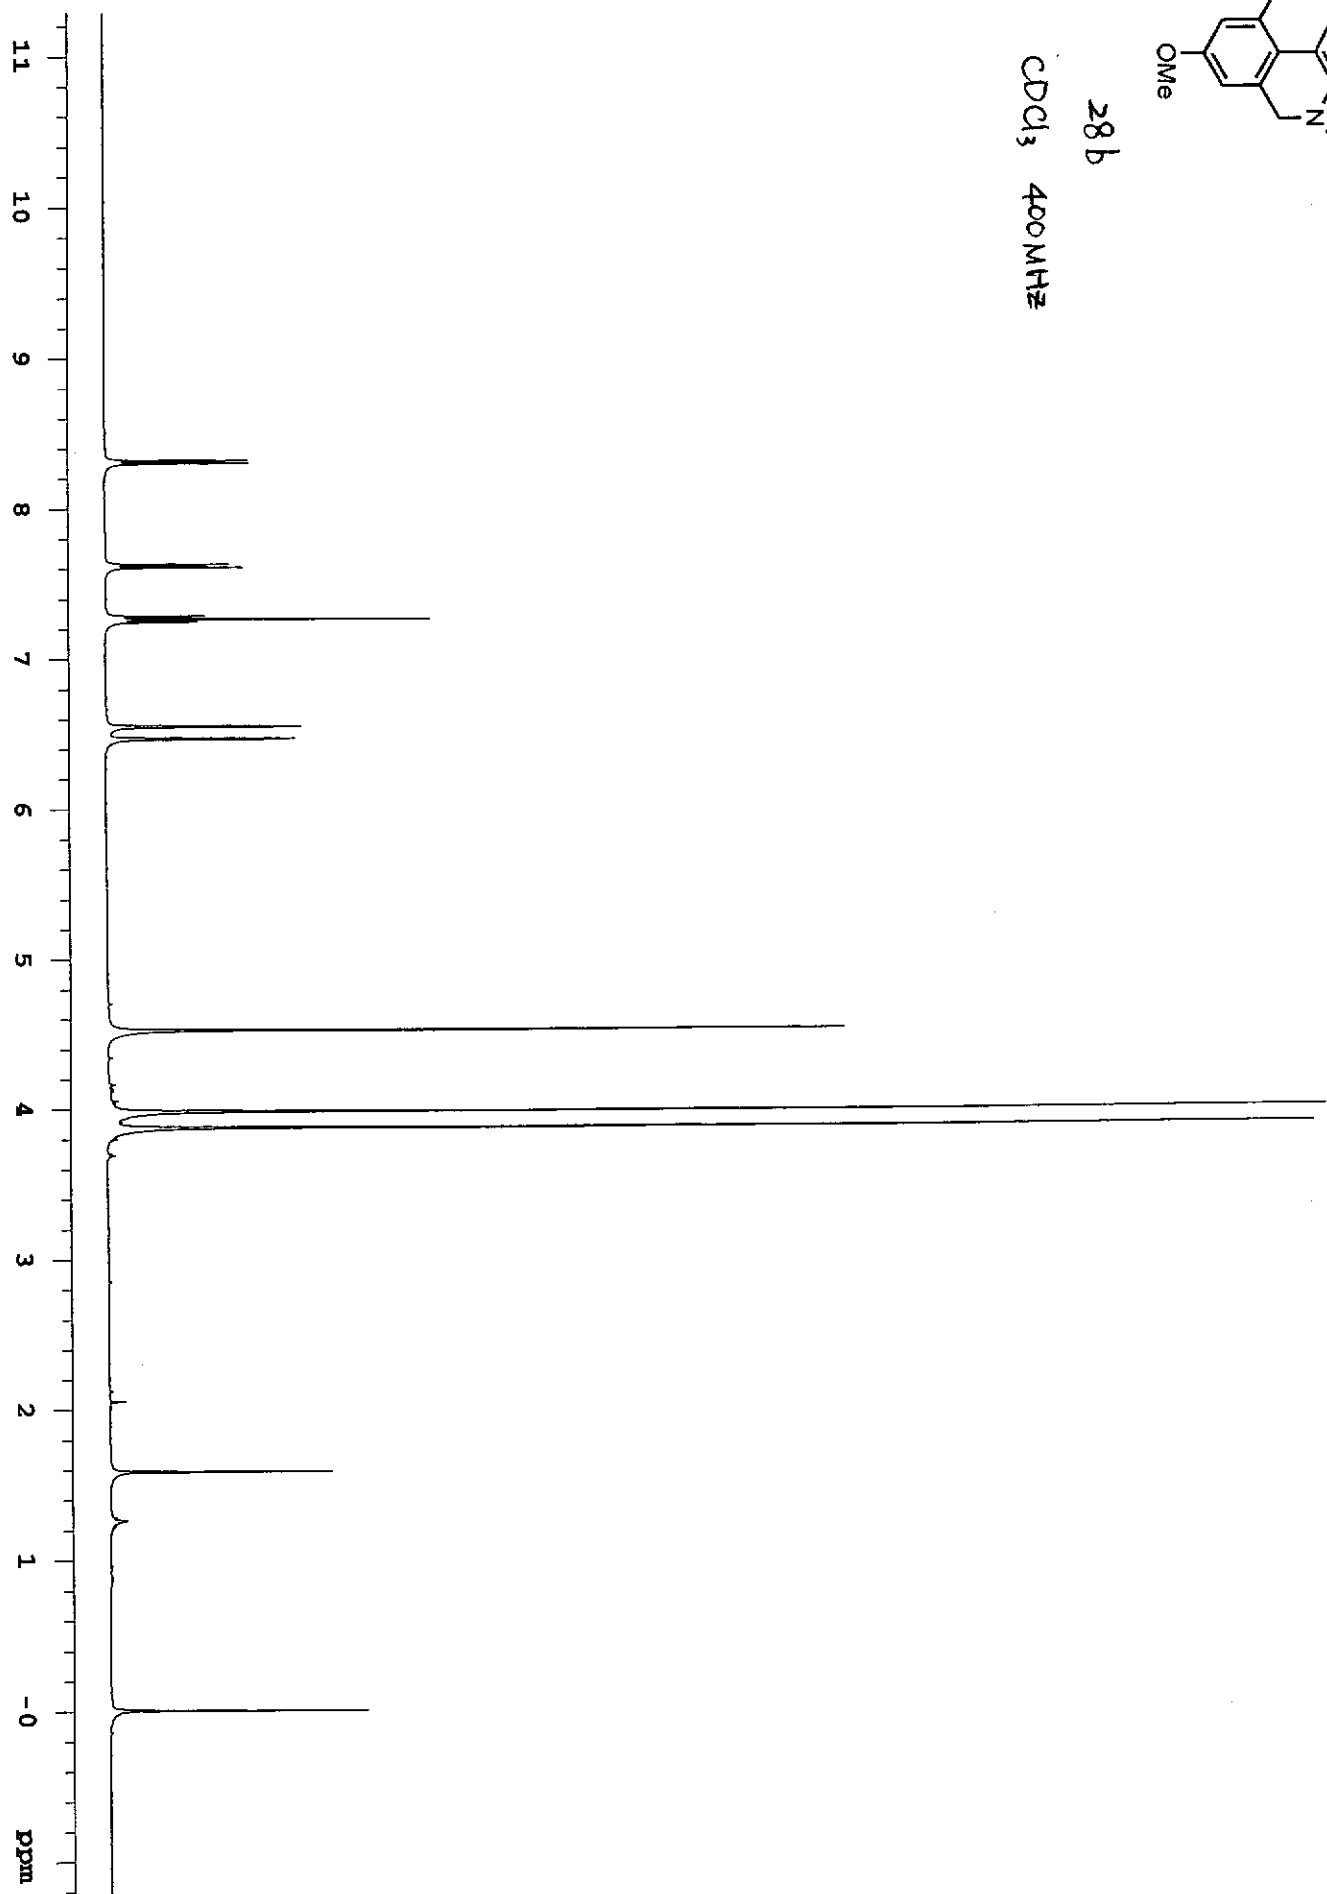

Quan - 4 - 113 - 2 - carbon.

| INDEX | FREQUENCY PPM | PPM     | HEIGHT |
|-------|---------------|---------|--------|
| 1     | 16931.168     | 168.425 | 5.4    |
| 2     | 16175.072     | 160.904 | 16.1   |
| 3     | 15978.991     | 158.953 | 12.9   |
| 4     | 15716.532     | 156.343 | 9.1    |
| 5     | 13481.814     | 134.112 | 14.4   |
| 6     | 13170.525     | 131.016 | 33.7   |
| 7     | 12614.325     | 125.483 | 32.1   |
| 8     | 12309.903     | 122.455 | 37.1   |
| 9     | 12105.429     | 120.421 | 13.5   |
| 10    | 11192.163     | 111.336 | 10.8   |
| 11    | 11111.289     | 110.531 | 14.2   |
| 12    | 10577.978     | 105.226 | 38.4   |
| 13    | 9950.059      | 98.980  | 32.1   |
| 14    | 7772.564      | 77.319  | 159.6  |
| 15    | 7740.519      | 77.000  | 162.0  |
| 16    | 7708.475      | 76.681  | 155.8  |
| 17    | 5639.320      | 56.098  | 41.5   |
| 18    | 5593.542      | 55.643  | 35.2   |
| 19    | 5585.149      | 55.559  | 37.8   |
| 20    | -2.027        | -0.020  | 7.4    |

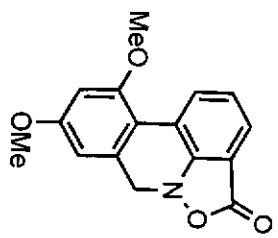

28b

CDCl<sub>3</sub> 100MHz

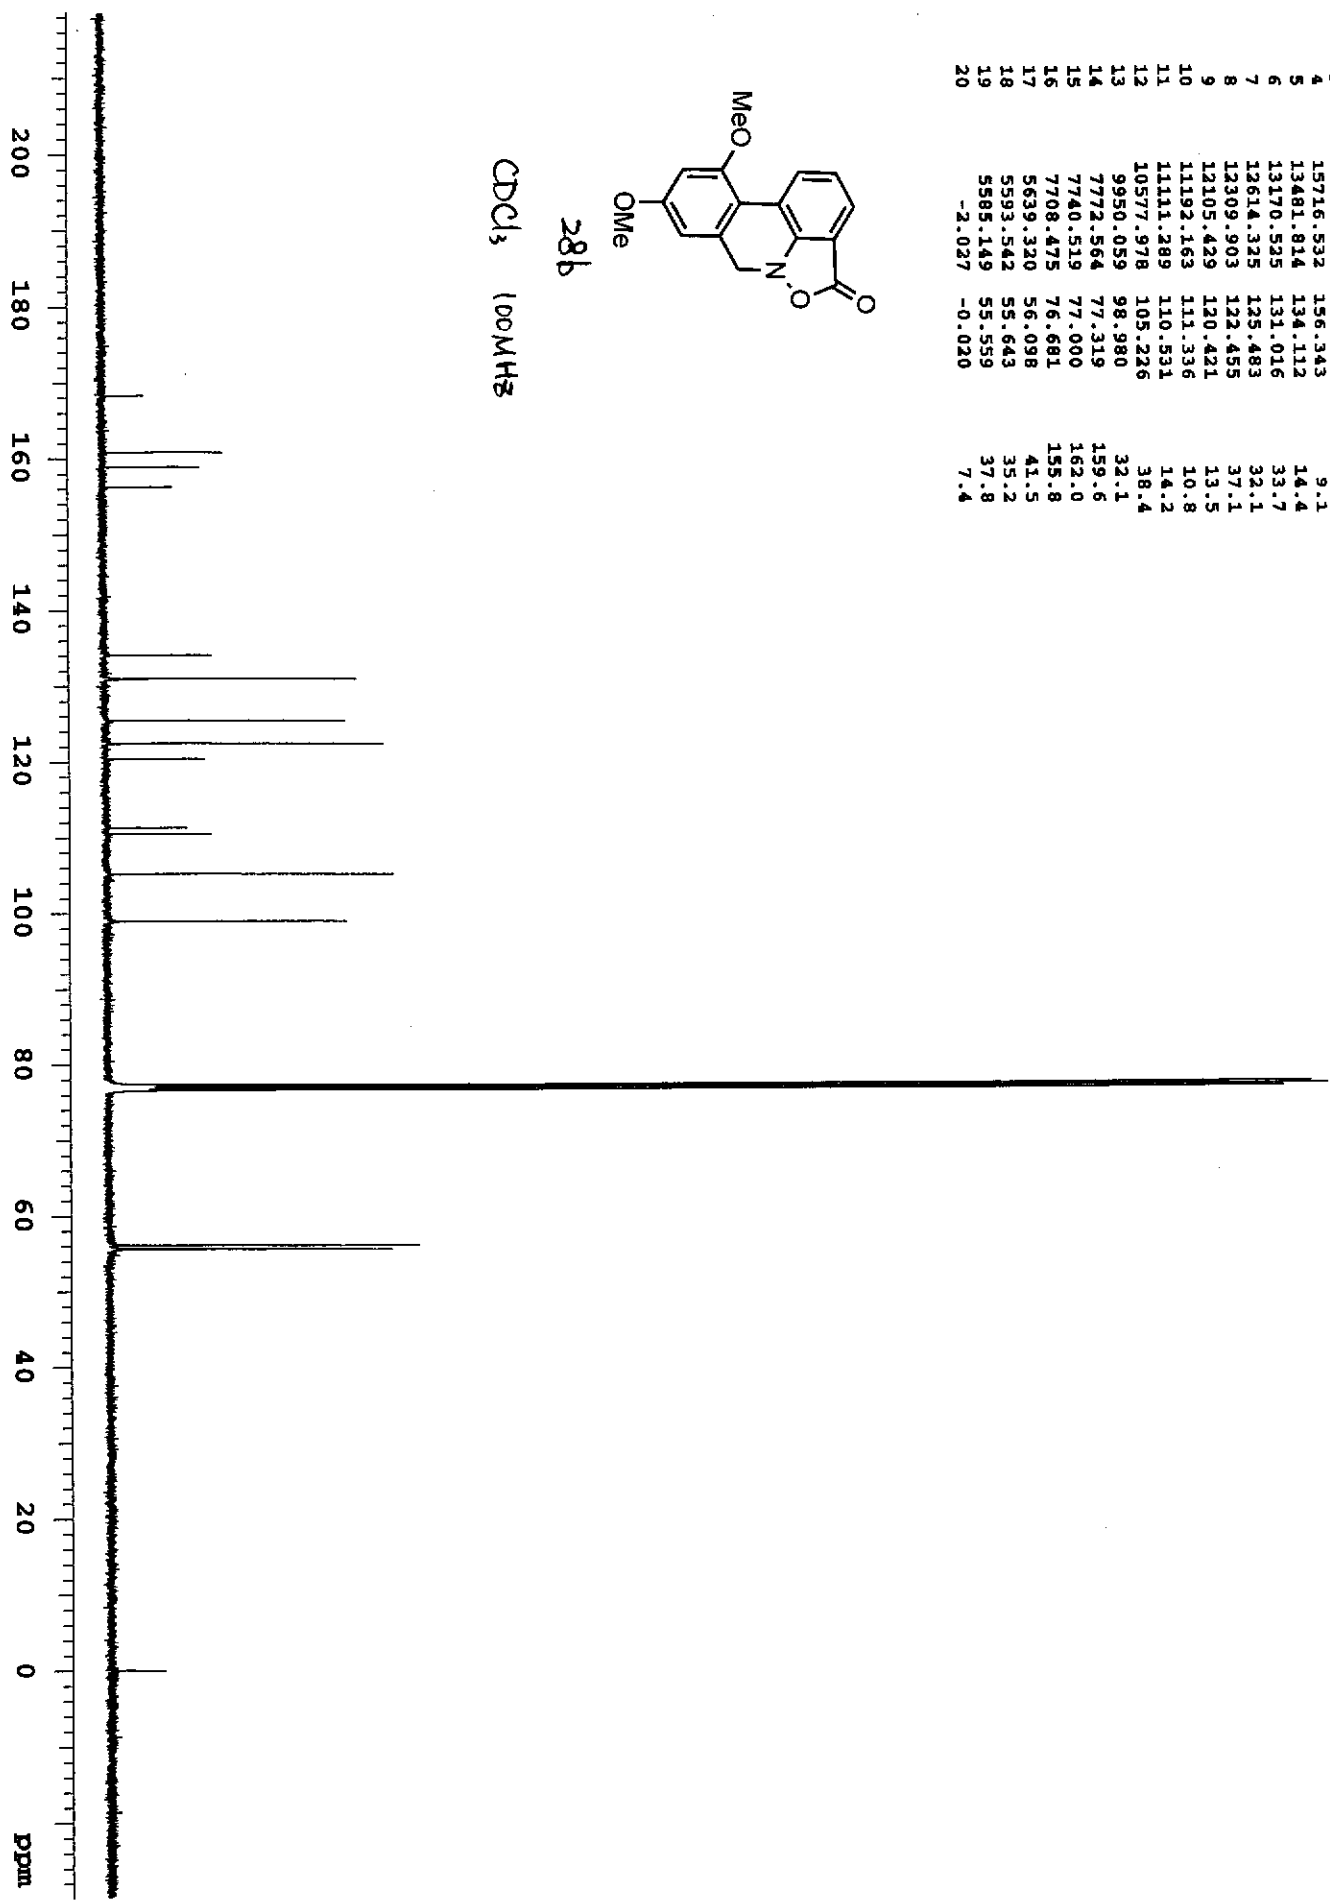

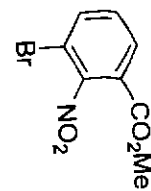

33  
400 MHz CDCl<sub>3</sub>

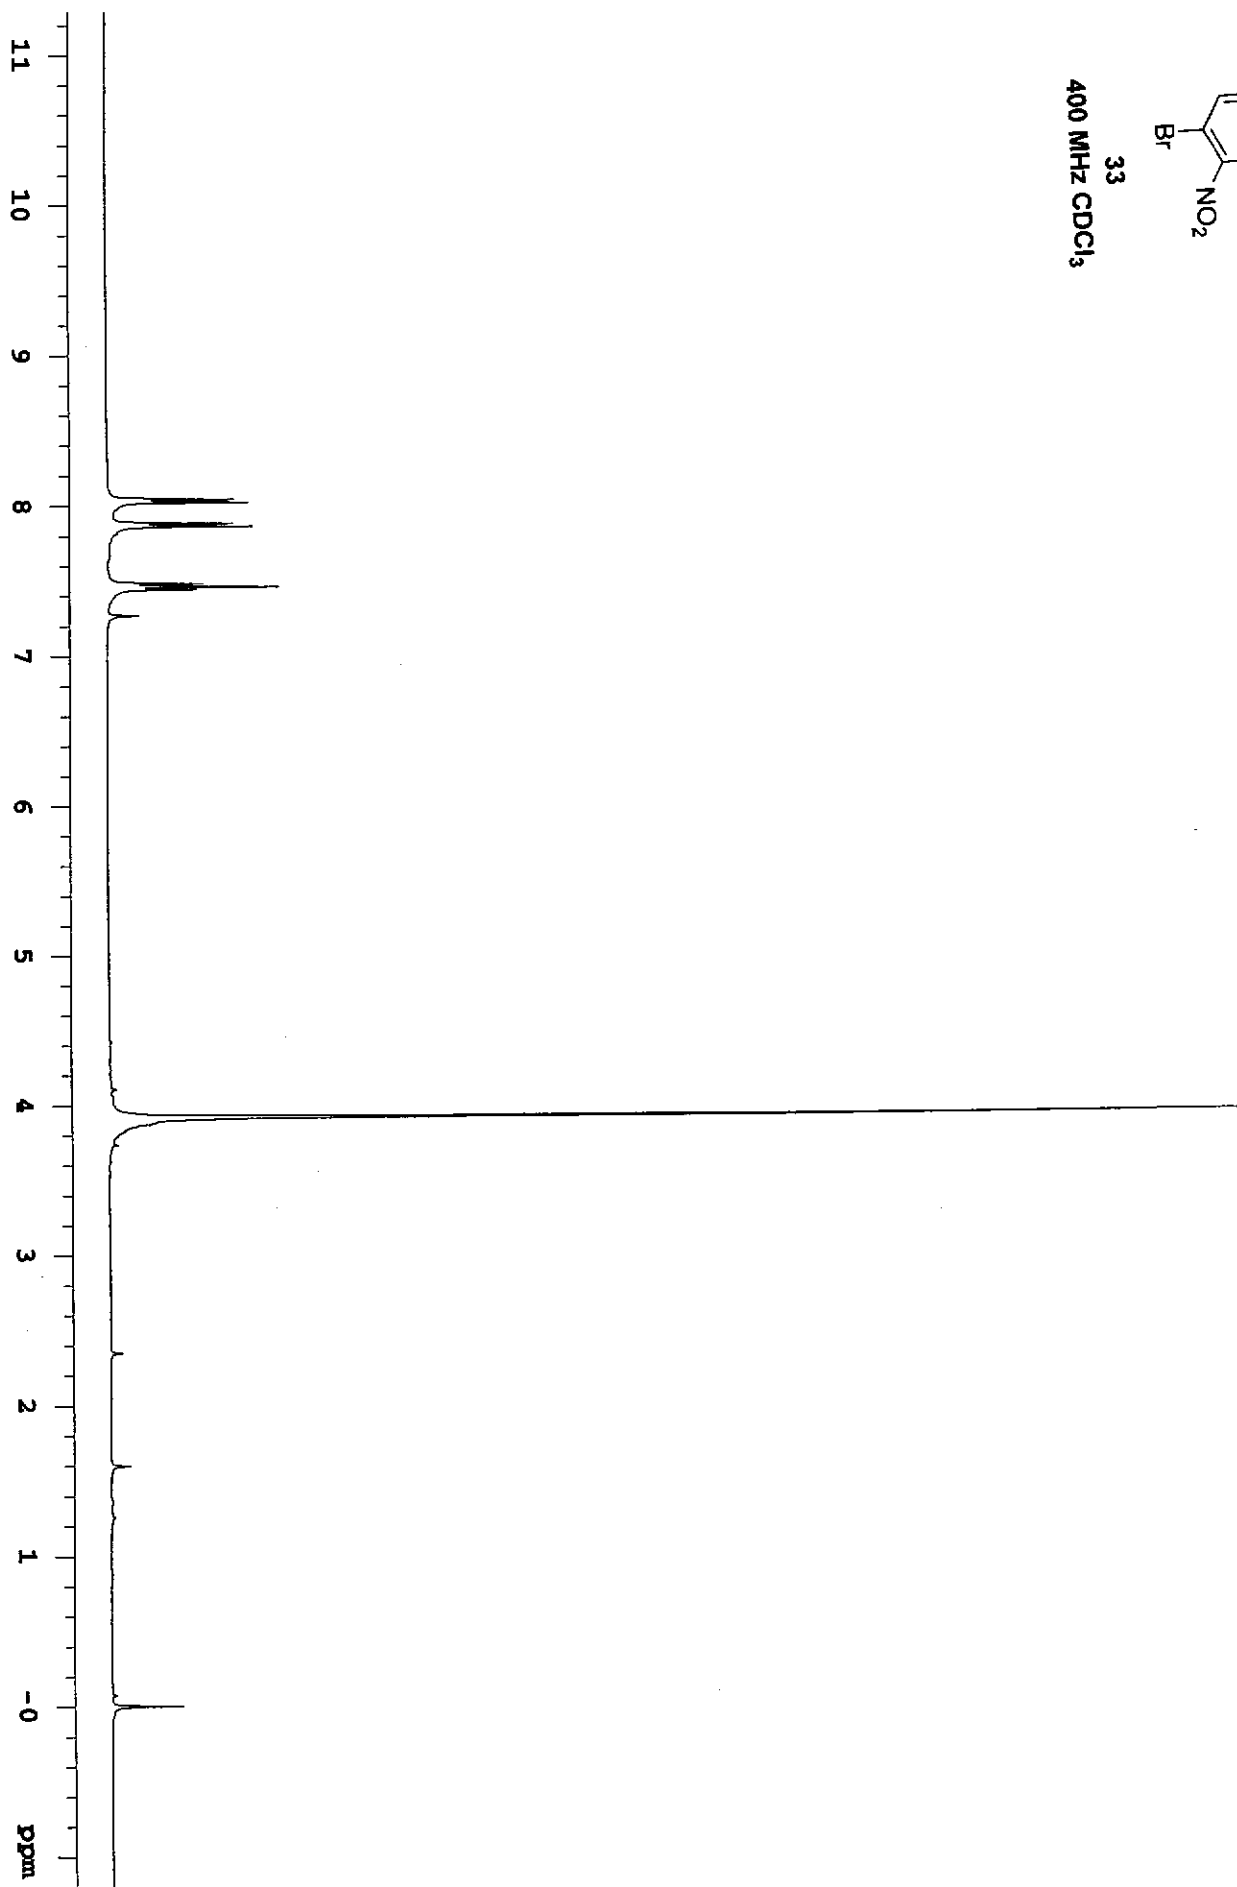

| INDEX | FREQUENCY | PPM     | HEIGHT |
|-------|-----------|---------|--------|
| 1     | 16355.270 | 162.697 | 22.6   |
| 2     | 13884.797 | 138.121 | 162.0  |
| 3     | 13179.819 | 131.108 | 156.9  |
| 4     | 13131.834 | 130.531 | 156.2  |
| 5     | 12531.301 | 124.657 | 28.5   |
| 6     | 11520.375 | 114.601 | 44.9   |
| 7     | 7797.117  | 77.563  | 133.3  |
| 8     | 7765.072  | 77.244  | 137.4  |
| 9     | 7733.791  | 76.933  | 136.1  |
| 10    | 5385.392  | 53.572  | 104.3  |

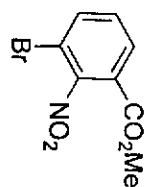

33  
100 MHz CDCl<sub>3</sub>

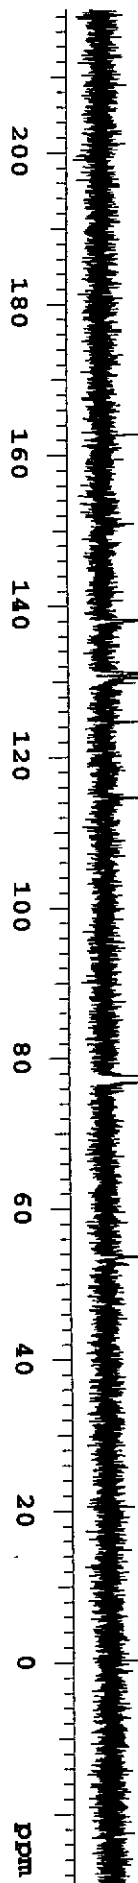

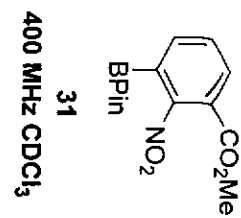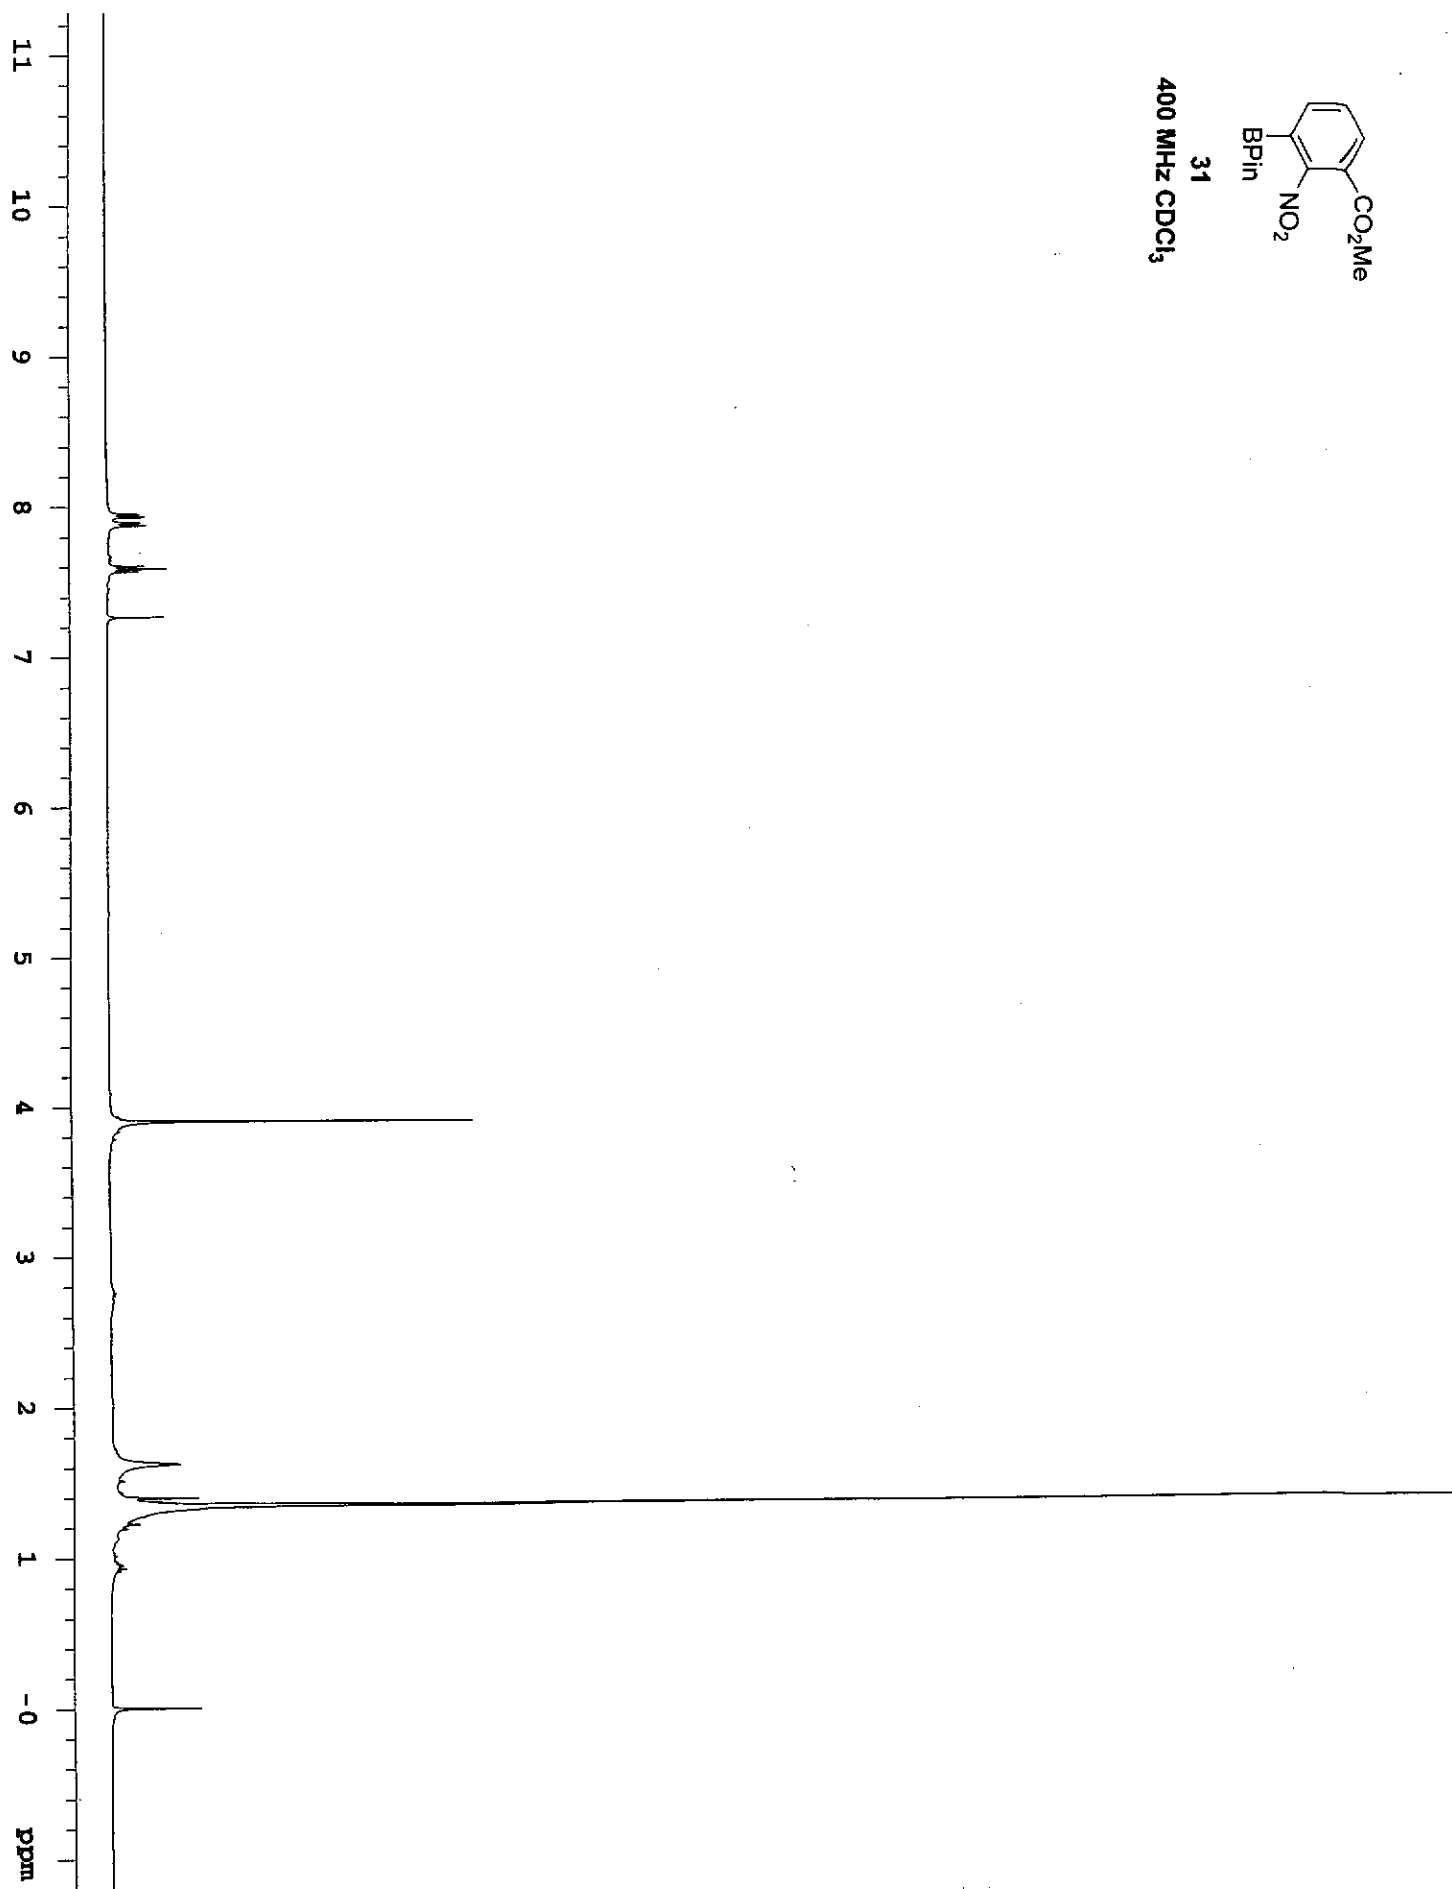

| INDEX | FREQUENCY | PPM     | HEIGHT |
|-------|-----------|---------|--------|
| 1     | 16561.131 | 164.744 | 9.2    |
| 2     | 13908.310 | 138.355 | 50.7   |
| 3     | 13321.592 | 132.519 | 52.5   |
| 4     | 13116.355 | 130.477 | 41.4   |
| 5     | 12496.066 | 124.307 | 9.2    |
| 6     | 8550.023  | 85.053  | 31.7   |
| 7     | 7772.564  | 77.319  | 110.5  |
| 8     | 7740.519  | 77.000  | 114.9  |
| 9     | 7708.475  | 76.681  | 113.6  |
| 10    | 5335.661  | 53.077  | 30.2   |
| 11    | 2476.076  | 24.631  | 14.1   |
| 12    | 2466.921  | 24.540  | 190.3  |
| 13    | -2.790    | -0.028  | 6.5    |

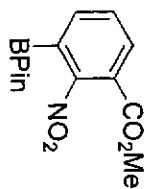

100 MHz CDCl<sub>3</sub>

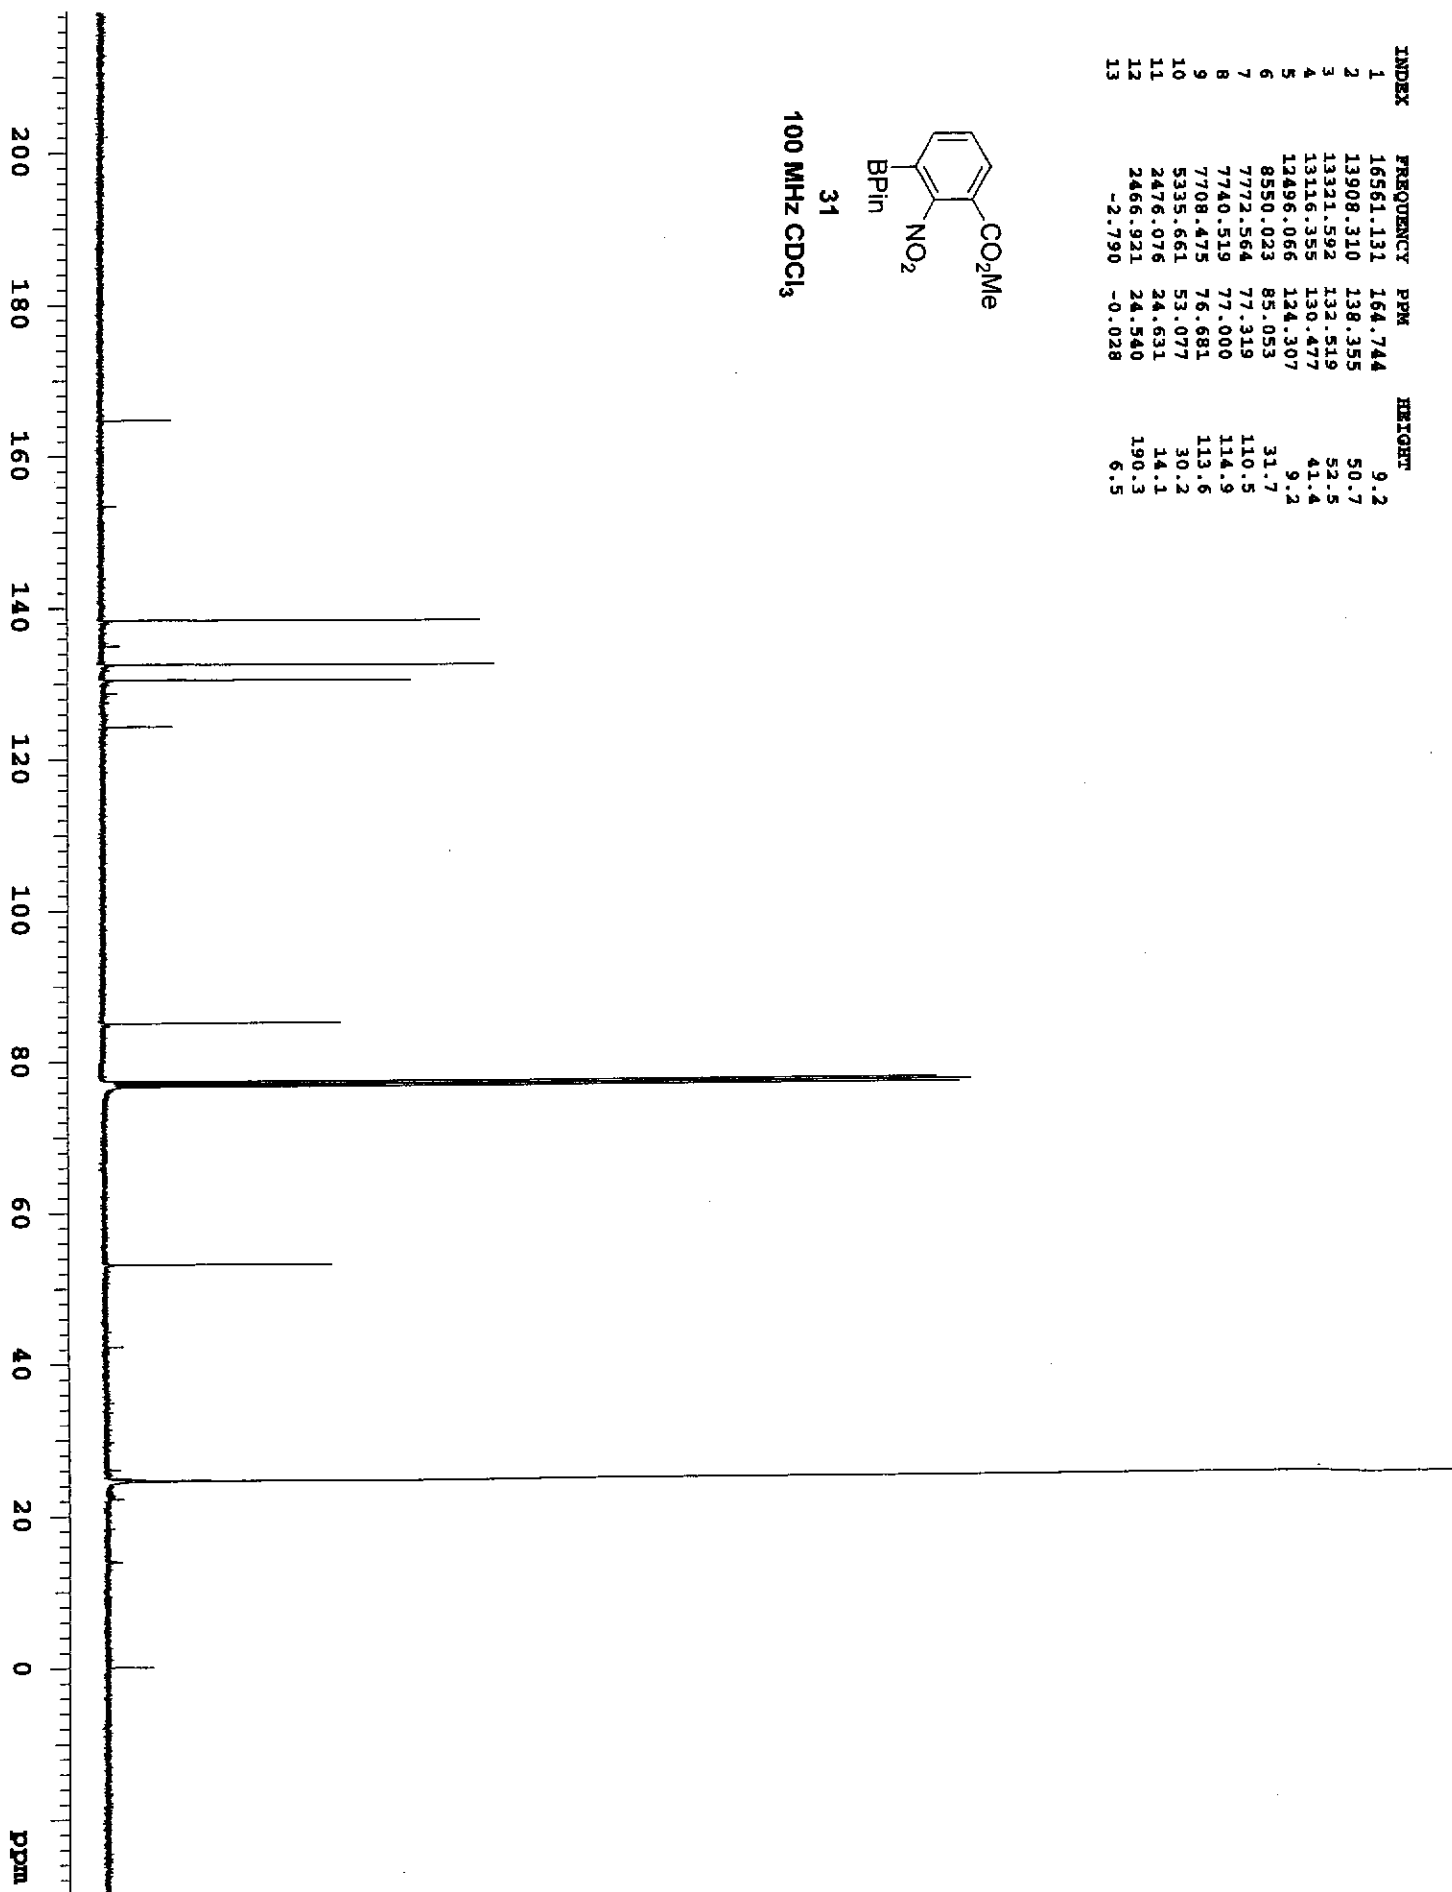

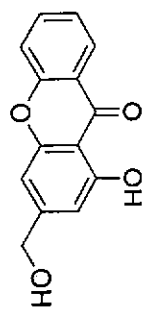

37b  
400 MHz CDCl<sub>3</sub>

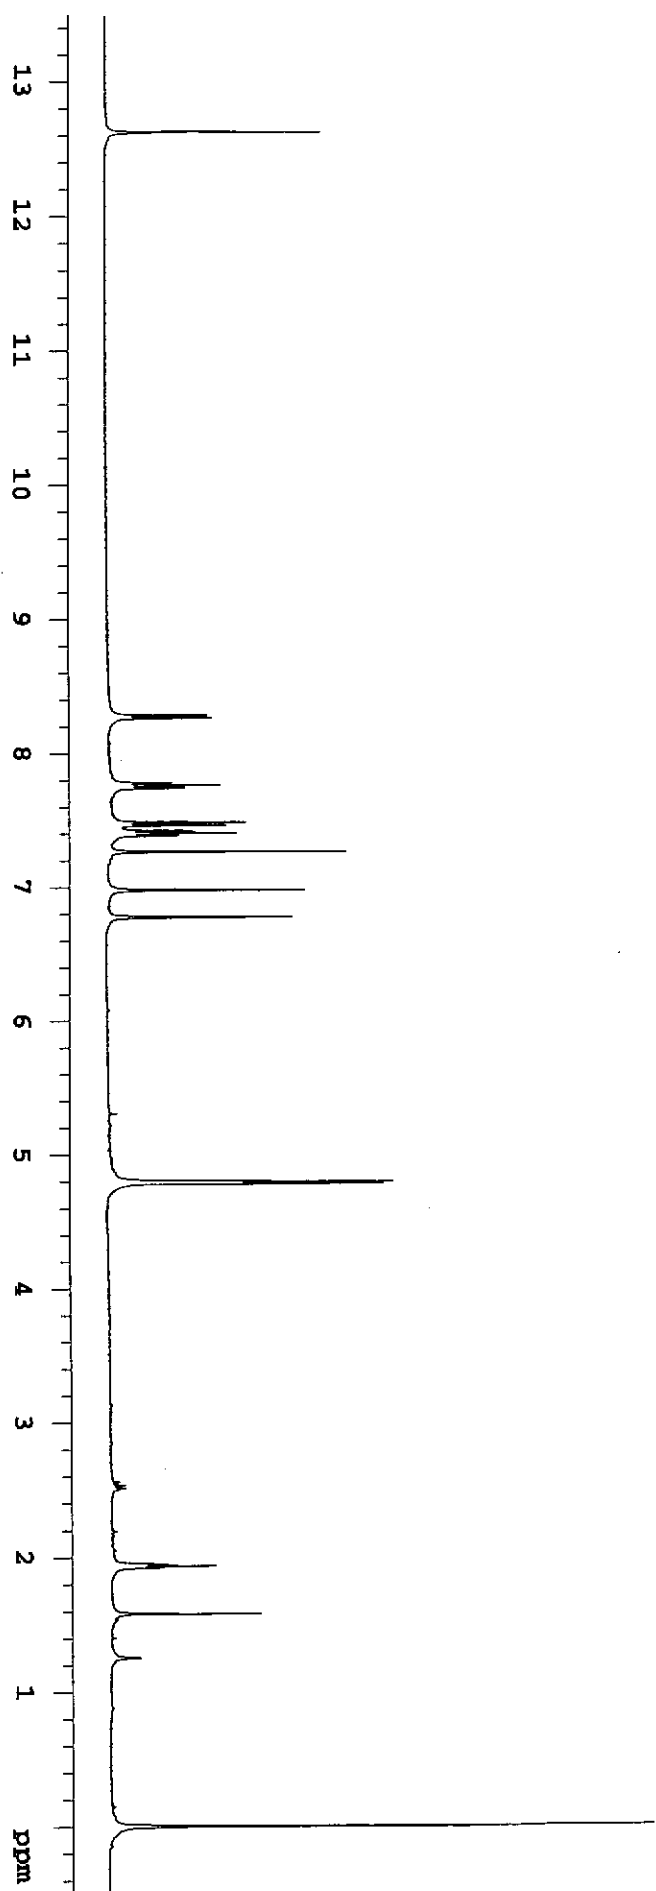

| INDEX | FREQUENCY | PPM     | HEIGHT |
|-------|-----------|---------|--------|
| 1     | 18292.622 | 181.969 | 6.3    |
| 2     | 16277.637 | 161.924 | 11.5   |
| 3     | 15728.304 | 156.460 | 8.5    |
| 4     | 15700.838 | 156.186 | 7.3    |
| 5     | 15207.201 | 151.276 | 11.6   |
| 6     | 13624.816 | 135.535 | 31.7   |
| 7     | 12660.431 | 125.942 | 25.7   |
| 8     | 12475.794 | 124.105 | 29.4   |
| 9     | 12121.779 | 120.583 | 8.2    |
| 10    | 11849.402 | 117.874 | 31.1   |
| 11    | 10858.313 | 108.015 | 6.4    |
| 12    | 10836.950 | 107.802 | 29.5   |
| 13    | 10491.328 | 104.364 | 26.6   |
| 14    | 7772.129  | 77.314  | 151.9  |
| 15    | 7740.084  | 76.996  | 160.6  |
| 16    | 7709.040  | 76.677  | 162.0  |
| 17    | 6486.537  | 64.526  | 24.1   |
| 18    | -2.461    | -0.024  | 8.3    |

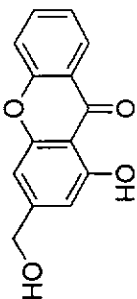

37b  
100 MHz CDCl<sub>3</sub>

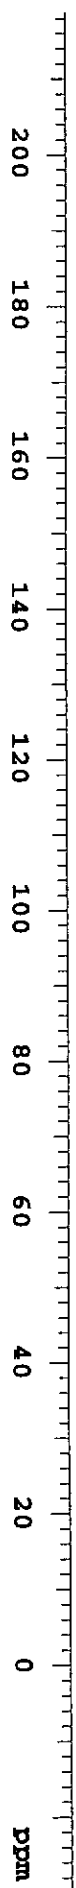



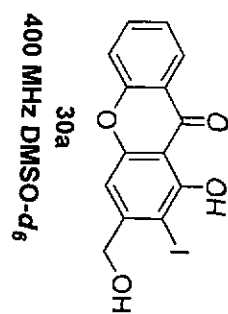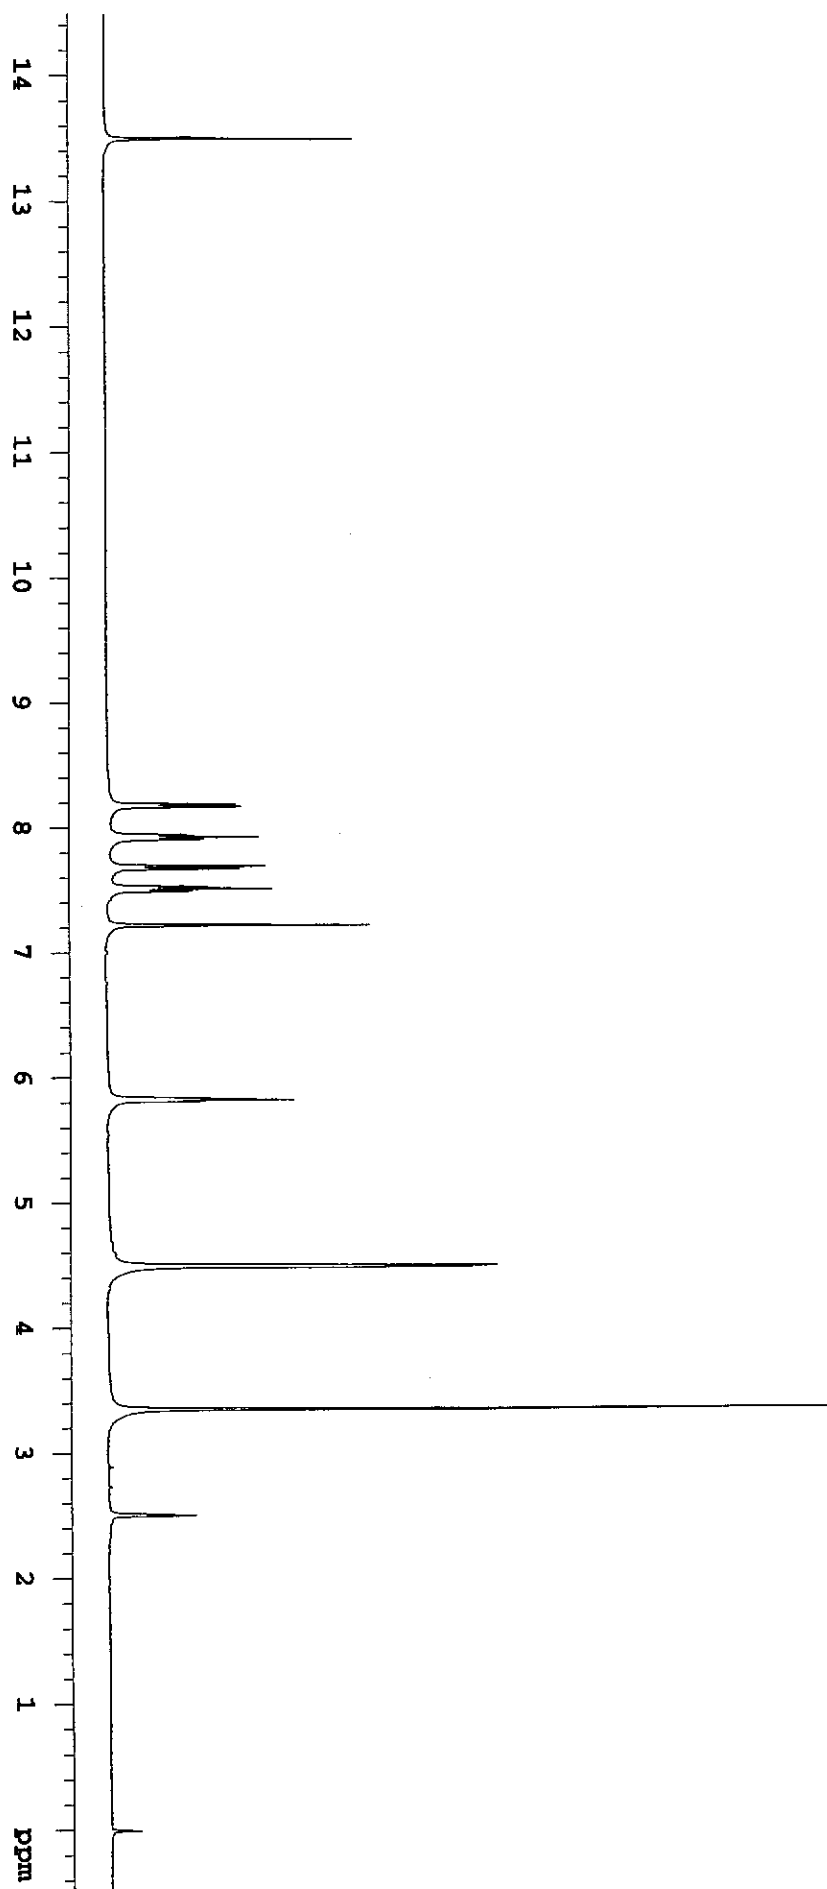

| INDEX | FREQUENCY | PPM     | HEIGHT |
|-------|-----------|---------|--------|
| 1     | 18179.170 | 180.839 | 7.8    |
| 2     | 16010.830 | 159.269 | 8.6    |
| 3     | 15668.259 | 155.862 | 6.4    |
| 4     | 15642.319 | 155.604 | 6.3    |
| 5     | 15488.200 | 154.070 | 7.7    |
| 6     | 13731.097 | 136.591 | 8.8    |
| 7     | 12623.275 | 125.571 | 10.5   |
| 8     | 12542.164 | 124.774 | 9.5    |
| 9     | 12017.483 | 119.545 | 6.5    |
| 10    | 11883.201 | 118.209 | 12.3   |
| 11    | 10753.253 | 106.969 | 6.3    |
| 12    | 10641.861 | 105.861 | 10.3   |
| 13    | 7790.669  | 77.498  | 5.2    |
| 14    | 6823.232  | 67.875  | 10.1   |
| 15    | 4033.841  | 40.127  | 20.8   |
| 16    | 4013.241  | 39.922  | 66.6   |
| 17    | 3991.878  | 39.710  | 136.1  |
| 18    | 3971.278  | 39.505  | 162.0  |
| 19    | 3949.915  | 39.292  | 139.4  |
| 20    | 3929.315  | 39.087  | 72.1   |
| 21    | 3907.952  | 38.875  | 25.5   |

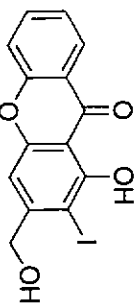

30a

100 MHz DMSO-d<sub>6</sub>

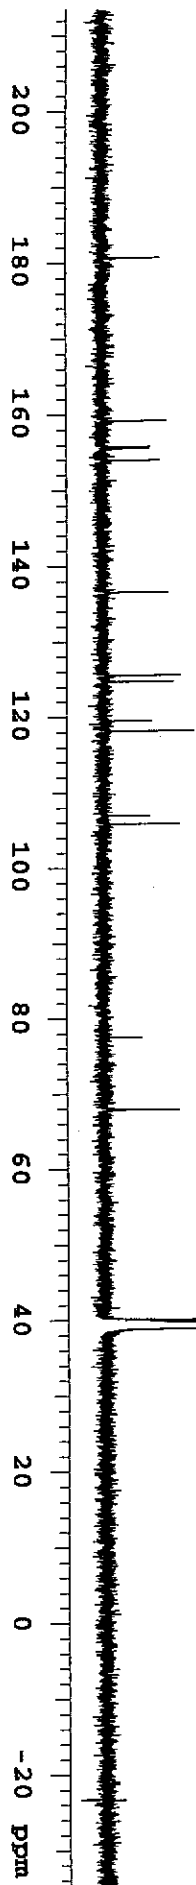

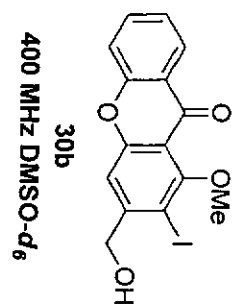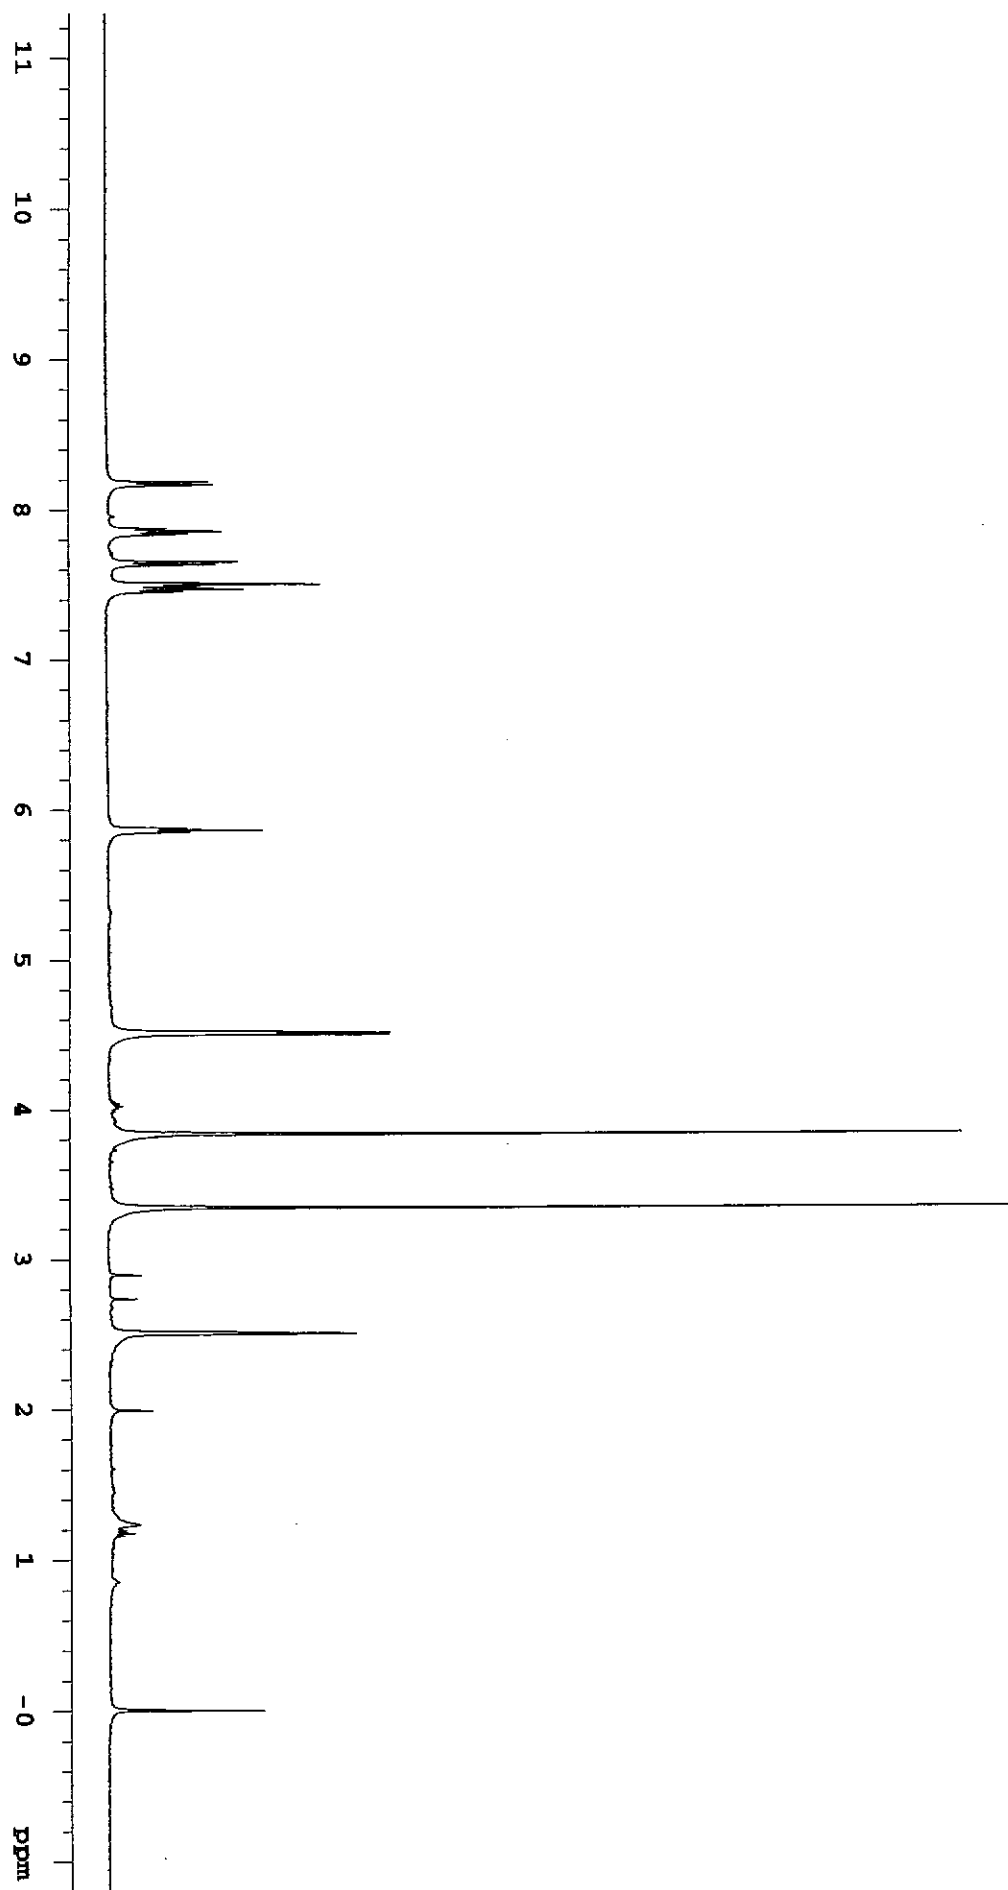

| INDEX | FREQUENCY | PPM     | HEIGHT |
|-------|-----------|---------|--------|
| 1     | 17480.281 | 173.887 | 7.9    |
| 2     | 15916.208 | 158.328 | 7.9    |
| 3     | 15832.363 | 157.395 | 9.6    |
| 4     | 15540.067 | 154.586 | 9.2    |
| 5     | 15302.023 | 152.218 | 12.8   |
| 6     | 13596.801 | 135.256 | 17.5   |
| 7     | 12683.534 | 126.171 | 16.3   |
| 8     | 12509.579 | 124.440 | 15.0   |
| 9     | 12250.172 | 121.860 | 11.0   |
| 10    | 11843.512 | 117.815 | 18.9   |
| 11    | 11525.357 | 114.650 | 7.3    |
| 12    | 11280.446 | 112.213 | 17.9   |
| 13    | 9019.787  | 89.725  | 8.6    |
| 14    | 6820.166  | 67.844  | 15.5   |
| 15    | 6160.966  | 61.287  | 14.6   |
| 16    | 4033.826  | 40.127  | 88.1   |
| 17    | 4013.226  | 39.922  | 271.3  |
| 18    | 3991.863  | 39.709  | 539.5  |
| 19    | 3971.263  | 39.505  | 637.5  |
| 20    | 3949.900  | 39.292  | 542.2  |
| 21    | 3929.300  | 39.087  | 271.3  |
| 22    | 3907.937  | 38.875  | 89.1   |

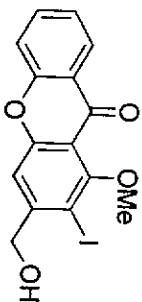

30b

100 MHz DMSO-d<sub>6</sub>

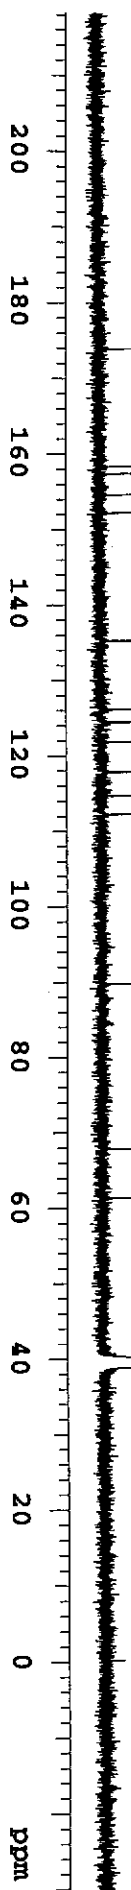

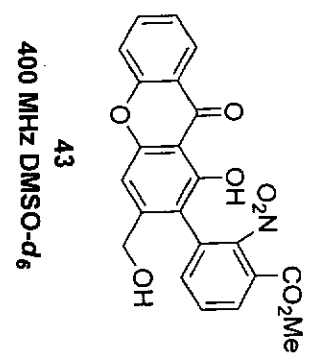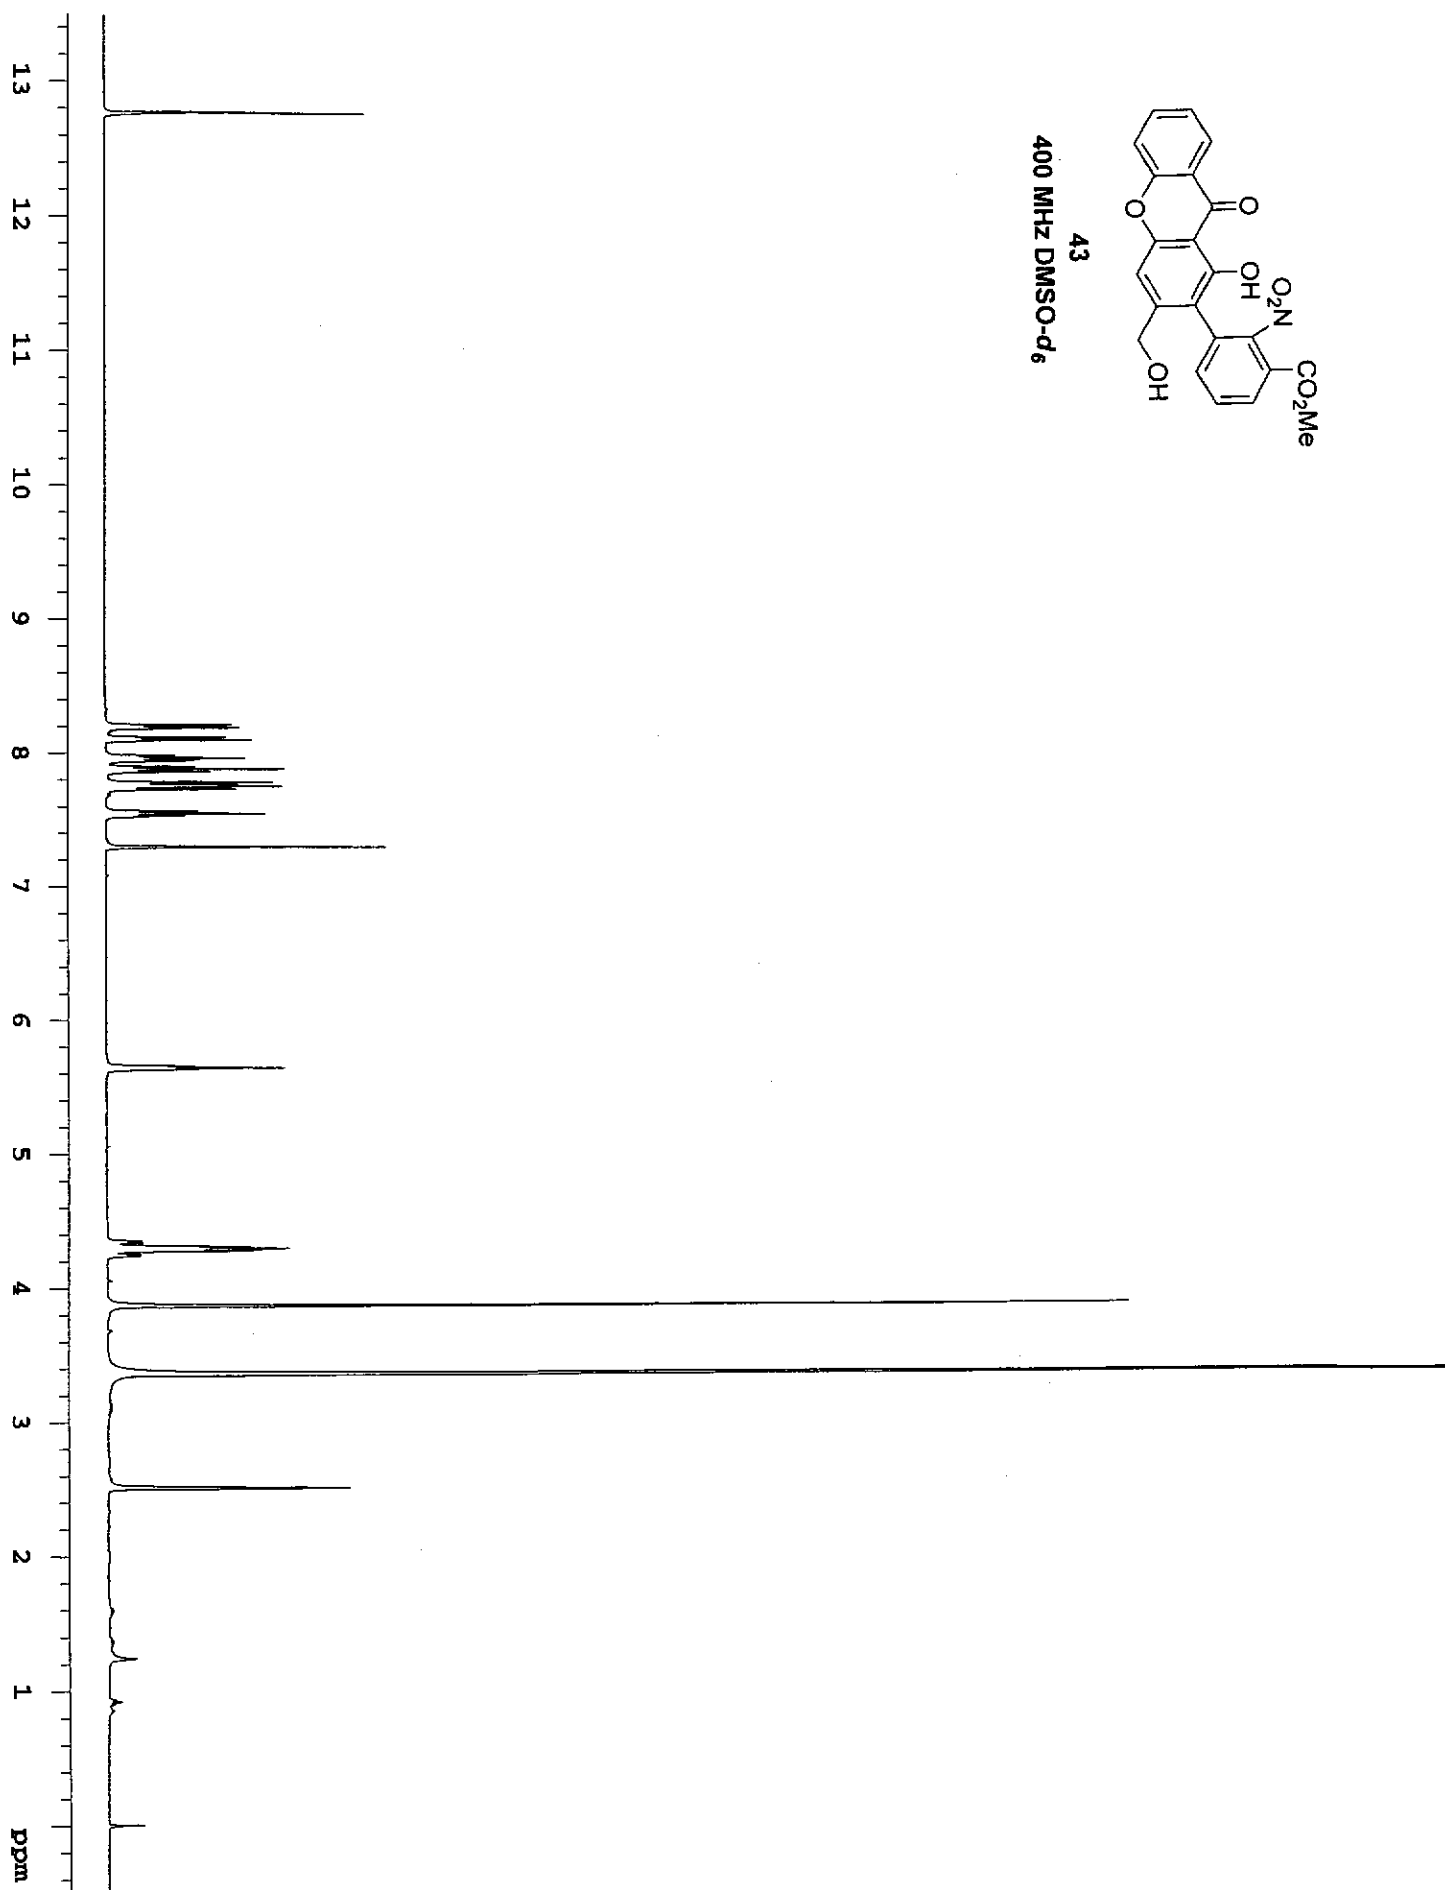

| INDEX | FREQUENCY | PPM     | HEIGHT |
|-------|-----------|---------|--------|
| 1     | 18246.310 | 181.507 | 16.3   |
| 2     | 16464.029 | 163.778 | 16.5   |
| 3     | 15876.548 | 157.934 | 15.7   |
| 4     | 15694.200 | 156.120 | 16.1   |
| 5     | 15659.867 | 155.778 | 17.5   |
| 6     | 15305.089 | 152.249 | 22.0   |
| 7     | 15029.659 | 149.509 | 12.1   |
| 8     | 13747.882 | 136.758 | 24.5   |
| 9     | 13739.489 | 136.675 | 21.6   |
| 10    | 13245.090 | 131.757 | 23.6   |
| 11    | 13152.008 | 130.831 | 18.9   |
| 12    | 12856.741 | 127.894 | 16.3   |
| 13    | 12610.305 | 125.442 | 22.3   |
| 14    | 12556.897 | 124.911 | 23.0   |
| 15    | 12444.742 | 123.795 | 18.4   |
| 16    | 12057.157 | 119.940 | 15.3   |
| 17    | 11887.779 | 118.255 | 28.2   |
| 18    | 11436.105 | 113.762 | 14.8   |
| 19    | 10715.105 | 106.590 | 13.3   |
| 20    | 10502.238 | 104.472 | 25.1   |
| 21    | 6101.469  | 60.695  | 24.5   |
| 22    | 5358.344  | 53.303  | 26.4   |
| 23    | 4034.603  | 40.135  | 85.1   |
| 24    | 4013.240  | 39.922  | 255.0  |
| 25    | 3992.640  | 39.717  | 520.4  |
| 26    | 3971.277  | 39.505  | 609.4  |
| 27    | 3950.677  | 39.300  | 522.0  |
| 28    | 3929.314  | 39.087  | 262.4  |
| 29    | 3908.715  | 38.882  | 87.0   |

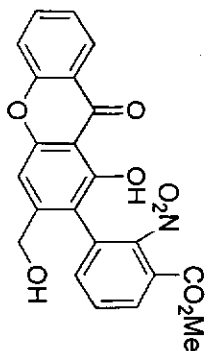

100 MHz DMSO-d<sub>6</sub>

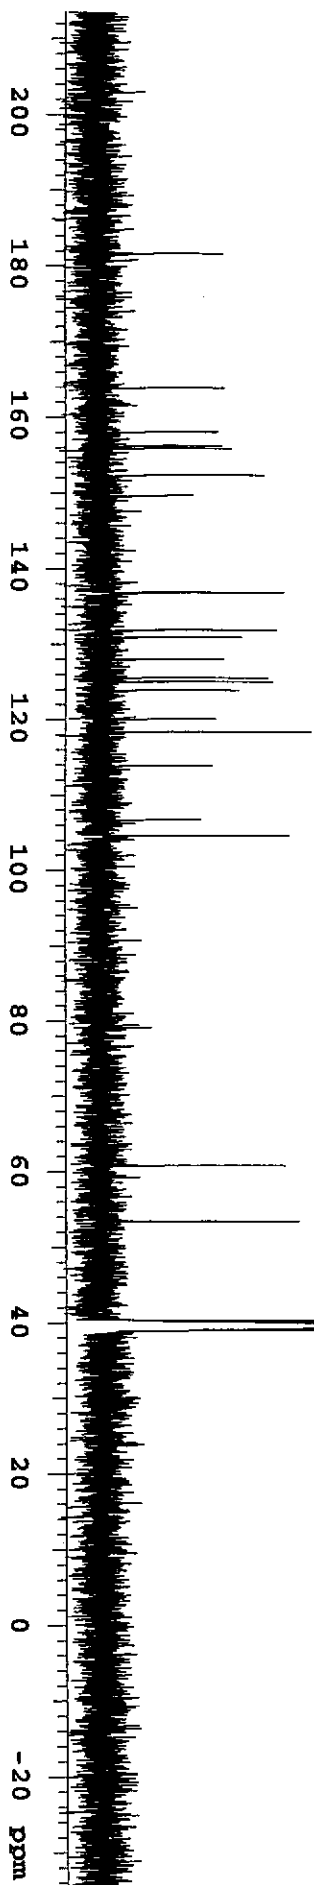

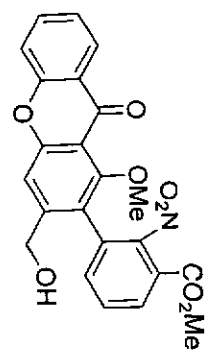

46

400 MHz DMSO-*d*<sub>6</sub>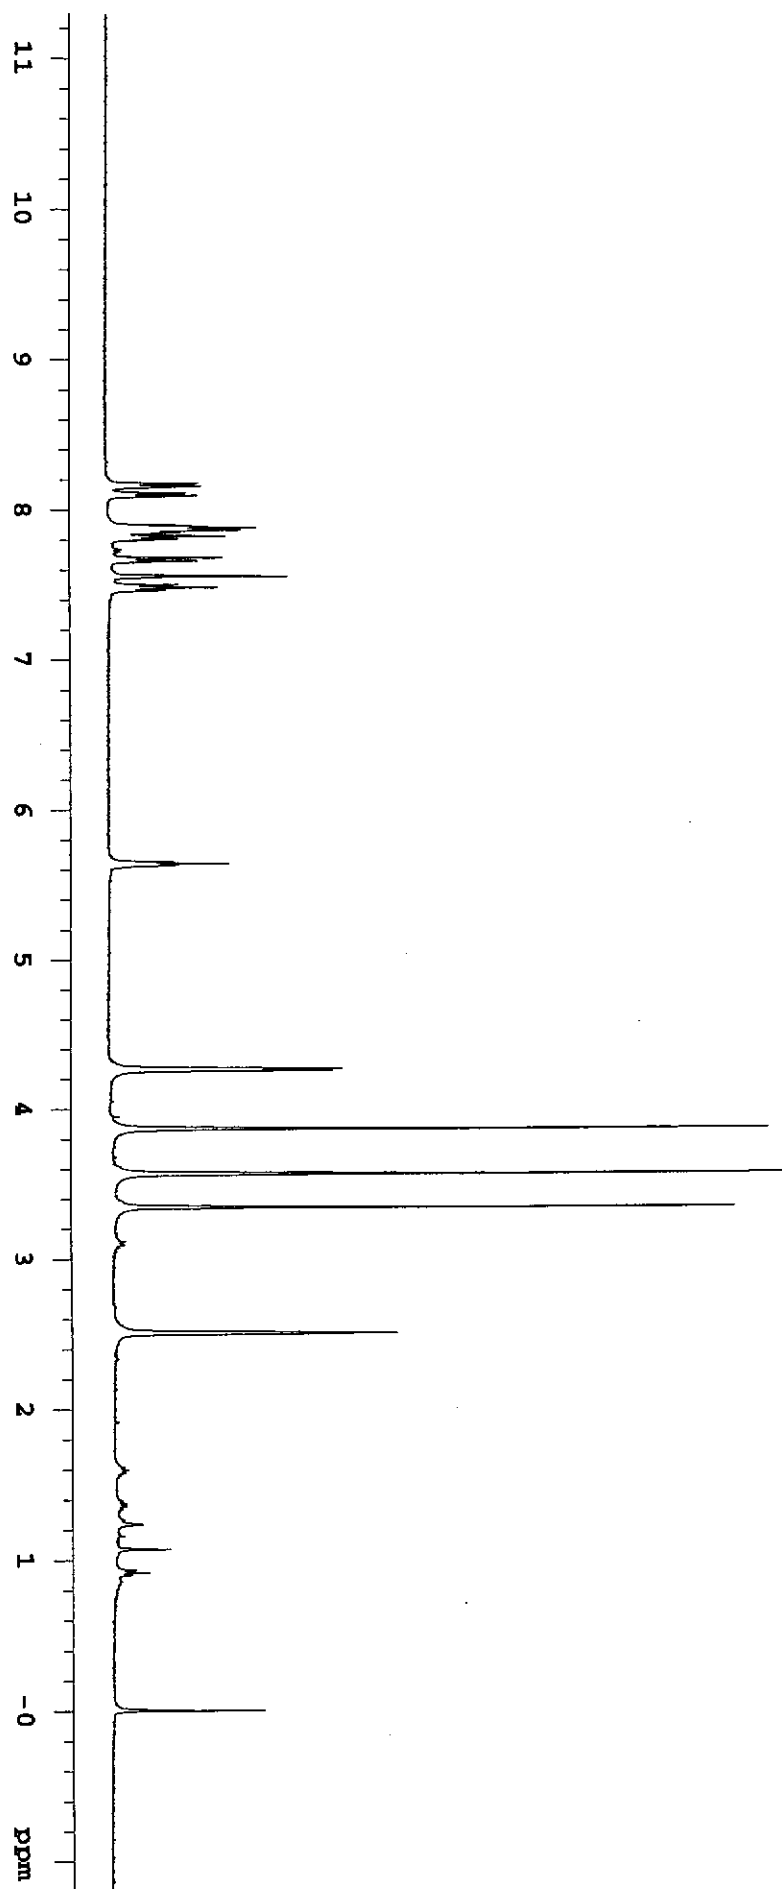

| INDEX | FREQUENCY | PPM     | HEIGHT |
|-------|-----------|---------|--------|
| 1     | 21613.250 | 215.000 | -4.8   |
| 2     | 17539.029 | 174.471 | 10.1   |
| 3     | 16470.119 | 163.838 | 9.4    |
| 4     | 15846.778 | 157.637 | 9.4    |
| 5     | 15779.637 | 156.970 | 8.9    |
| 6     | 15544.645 | 154.632 | 12.0   |
| 7     | 15096.786 | 150.177 | 13.9   |
| 8     | 14983.867 | 149.054 | 7.4    |
| 9     | 13698.275 | 136.265 | 16.2   |
| 10    | 13599.853 | 135.286 | 14.8   |
| 11    | 13216.083 | 131.468 | 18.1   |
| 12    | 13145.890 | 130.770 | 14.3   |
| 13    | 12917.001 | 128.493 | 11.7   |
| 14    | 12670.564 | 126.042 | 18.2   |
| 15    | 12515.683 | 124.501 | 15.5   |
| 16    | 12454.646 | 123.894 | 12.6   |
| 17    | 12306.631 | 122.421 | 11.6   |
| 18    | 12272.298 | 122.080 | 12.9   |
| 19    | 11838.935 | 117.769 | 19.5   |
| 20    | 11433.802 | 113.739 | 8.0    |
| 21    | 11127.854 | 110.695 | 18.3   |
| 22    | 7973.003  | 79.312  | 7.9    |
| 23    | 7939.432  | 78.978  | 9.0    |
| 24    | 7906.625  | 78.652  | 9.2    |
| 25    | 6245.655  | 62.129  | 19.1   |
| 26    | 6079.329  | 60.475  | 16.6   |
| 27    | 5358.329  | 53.303  | 17.6   |
| 28    | 4034.589  | 40.134  | 122.8  |
| 29    | 4013.226  | 39.922  | 371.5  |
| 30    | 3992.626  | 39.717  | 722.9  |
| 31    | 3971.263  | 39.505  | 863.5  |
| 32    | 3950.663  | 39.300  | 718.0  |
| 33    | 3929.300  | 39.087  | 368.9  |
| 34    | 3908.700  | 38.882  | 119.8  |
| 35    | 11.486    | 0.114   | 5.3    |

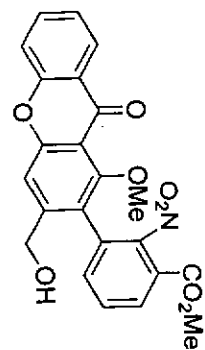

100 MHz DMSO-d<sub>6</sub>

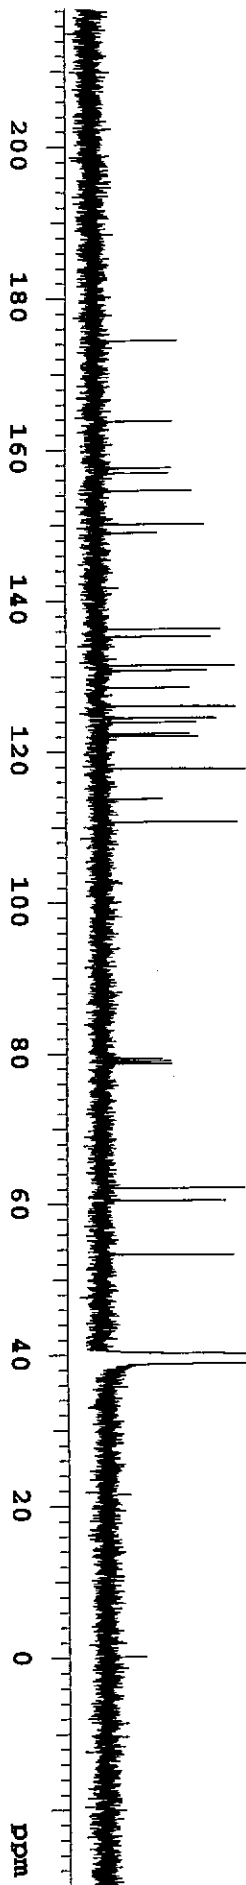



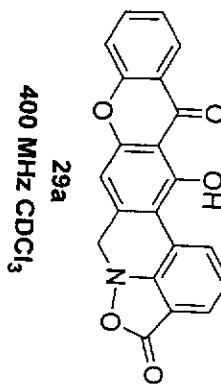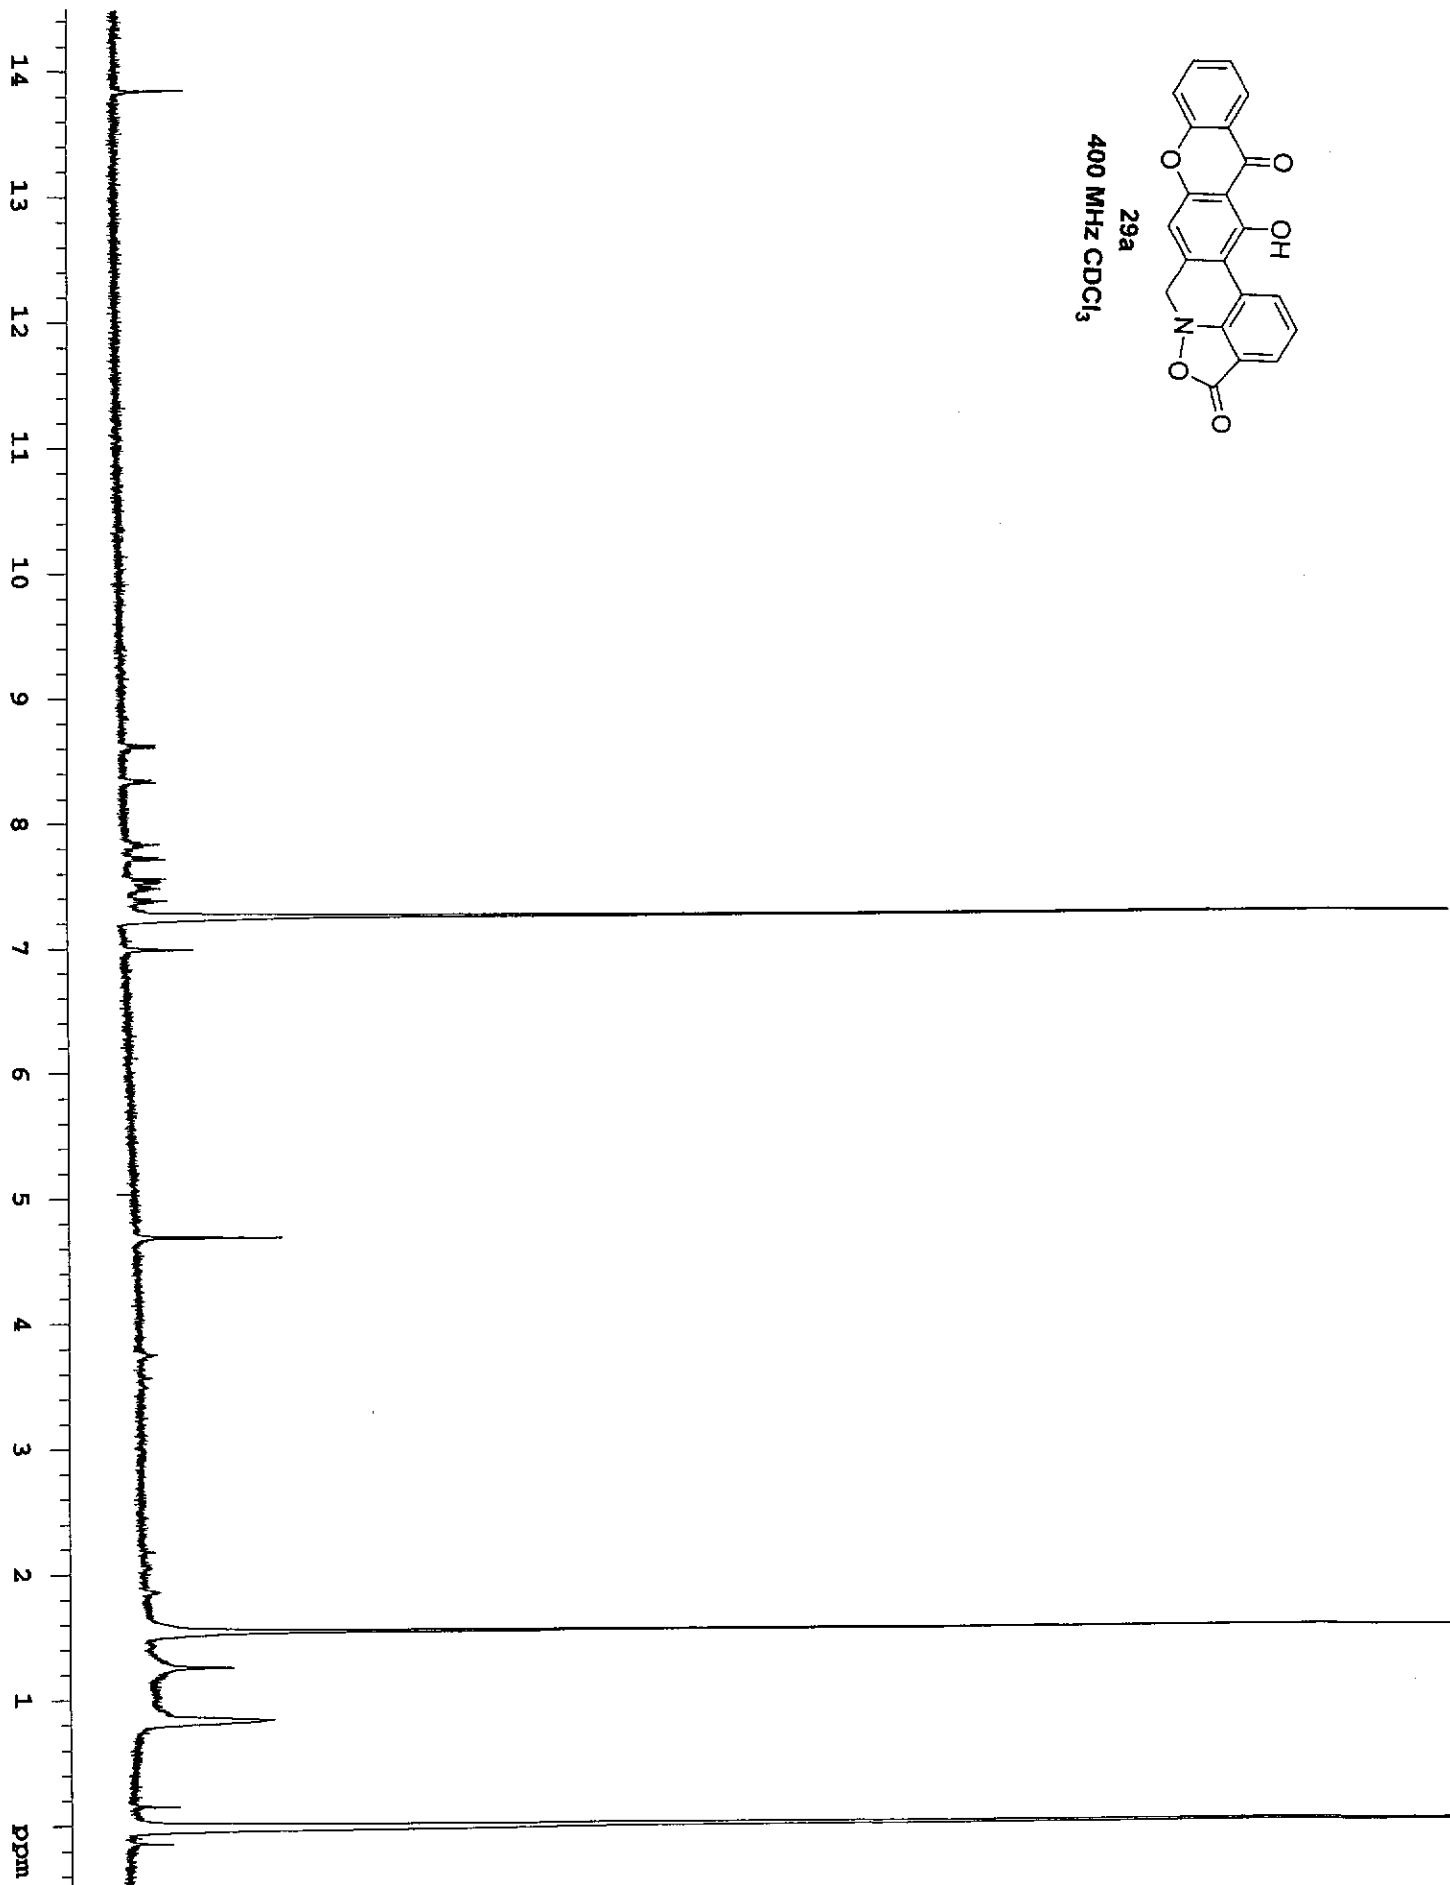

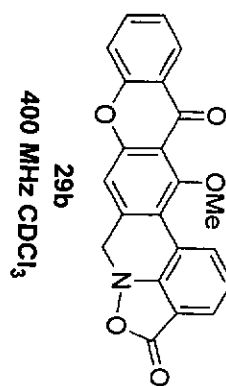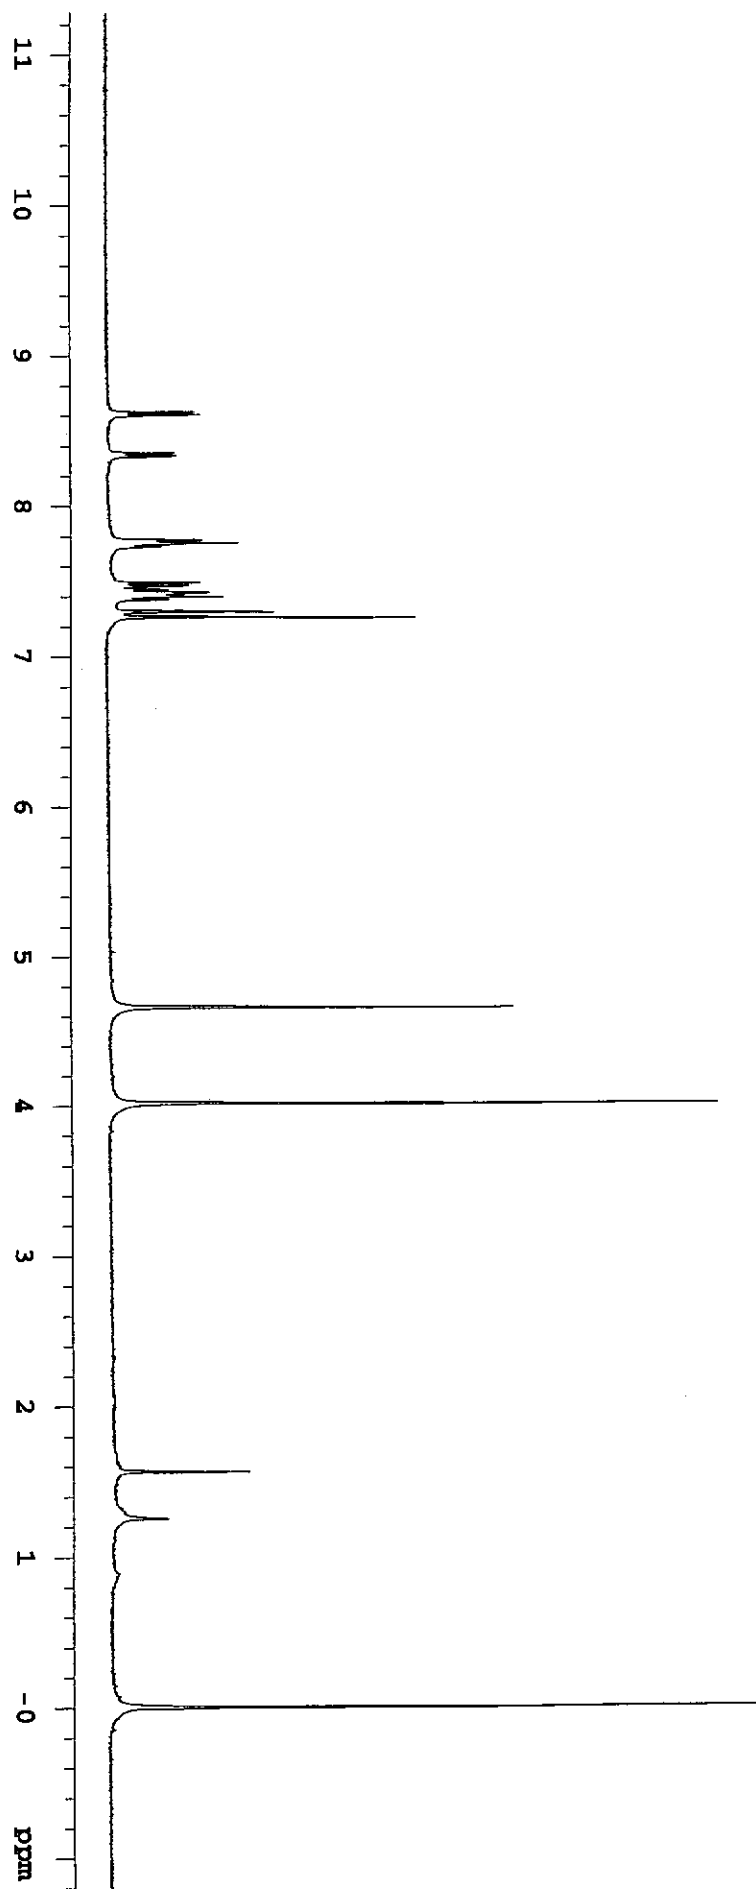

| INDEX | FREQUENCY | PPM     | HEIGHT |
|-------|-----------|---------|--------|
| 1     | 17646.392 | 175.540 | 7.0    |
| 2     | 16872.748 | 167.844 | 5.9    |
| 3     | 15972.452 | 158.888 | 7.2    |
| 4     | 15819.860 | 157.370 | 8.2    |
| 5     | 15756.534 | 156.741 | 6.7    |
| 6     | 15581.815 | 155.002 | 8.3    |
| 7     | 13987.986 | 139.148 | 13.3   |
| 8     | 13568.357 | 134.973 | 33.2   |
| 9     | 13285.297 | 132.158 | 29.7   |
| 10    | 12751.987 | 126.852 | 30.5   |
| 11    | 12703.157 | 126.367 | 33.6   |
| 12    | 12523.098 | 124.575 | 42.6   |
| 13    | 12330.831 | 122.663 | 11.6   |
| 14    | 11971.476 | 119.088 | 11.1   |
| 15    | 11815.831 | 117.540 | 35.3   |
| 16    | 11467.157 | 114.071 | 31.7   |
| 17    | 11192.491 | 111.339 | 10.0   |
| 18    | 7772.129  | 77.314  | 515.3  |
| 19    | 7740.084  | 76.996  | 534.3  |
| 20    | 7708.040  | 76.677  | 534.8  |
| 21    | 6217.974  | 61.854  | 19.0   |
| 22    | 5632.018  | 56.025  | 33.3   |
| 23    | -2.462    | -0.024  | 19.5   |

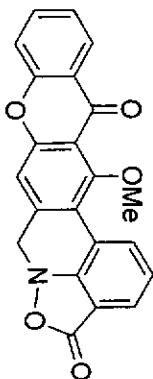

29b  
100 MHz CDCl<sub>3</sub>

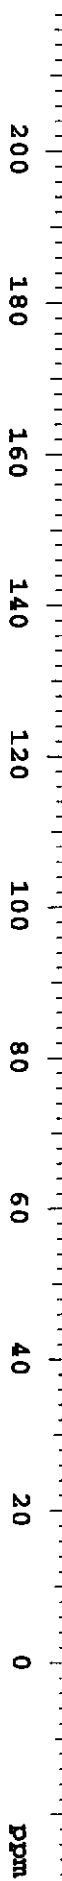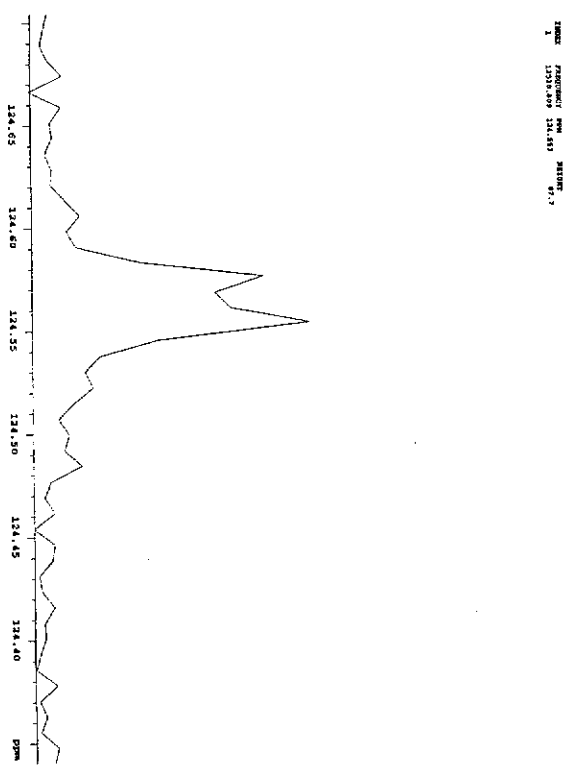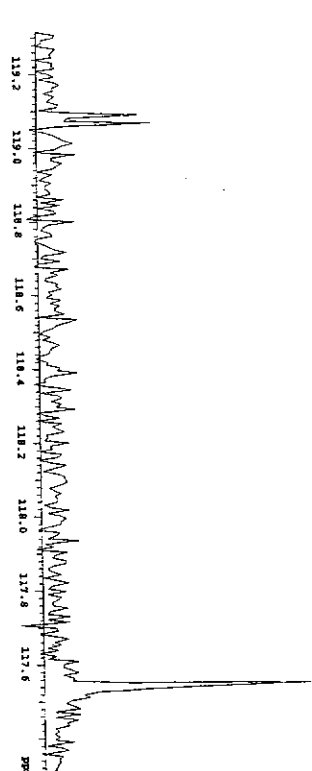

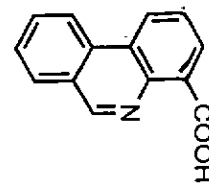

49 a

400 MHz CDCl<sub>3</sub>

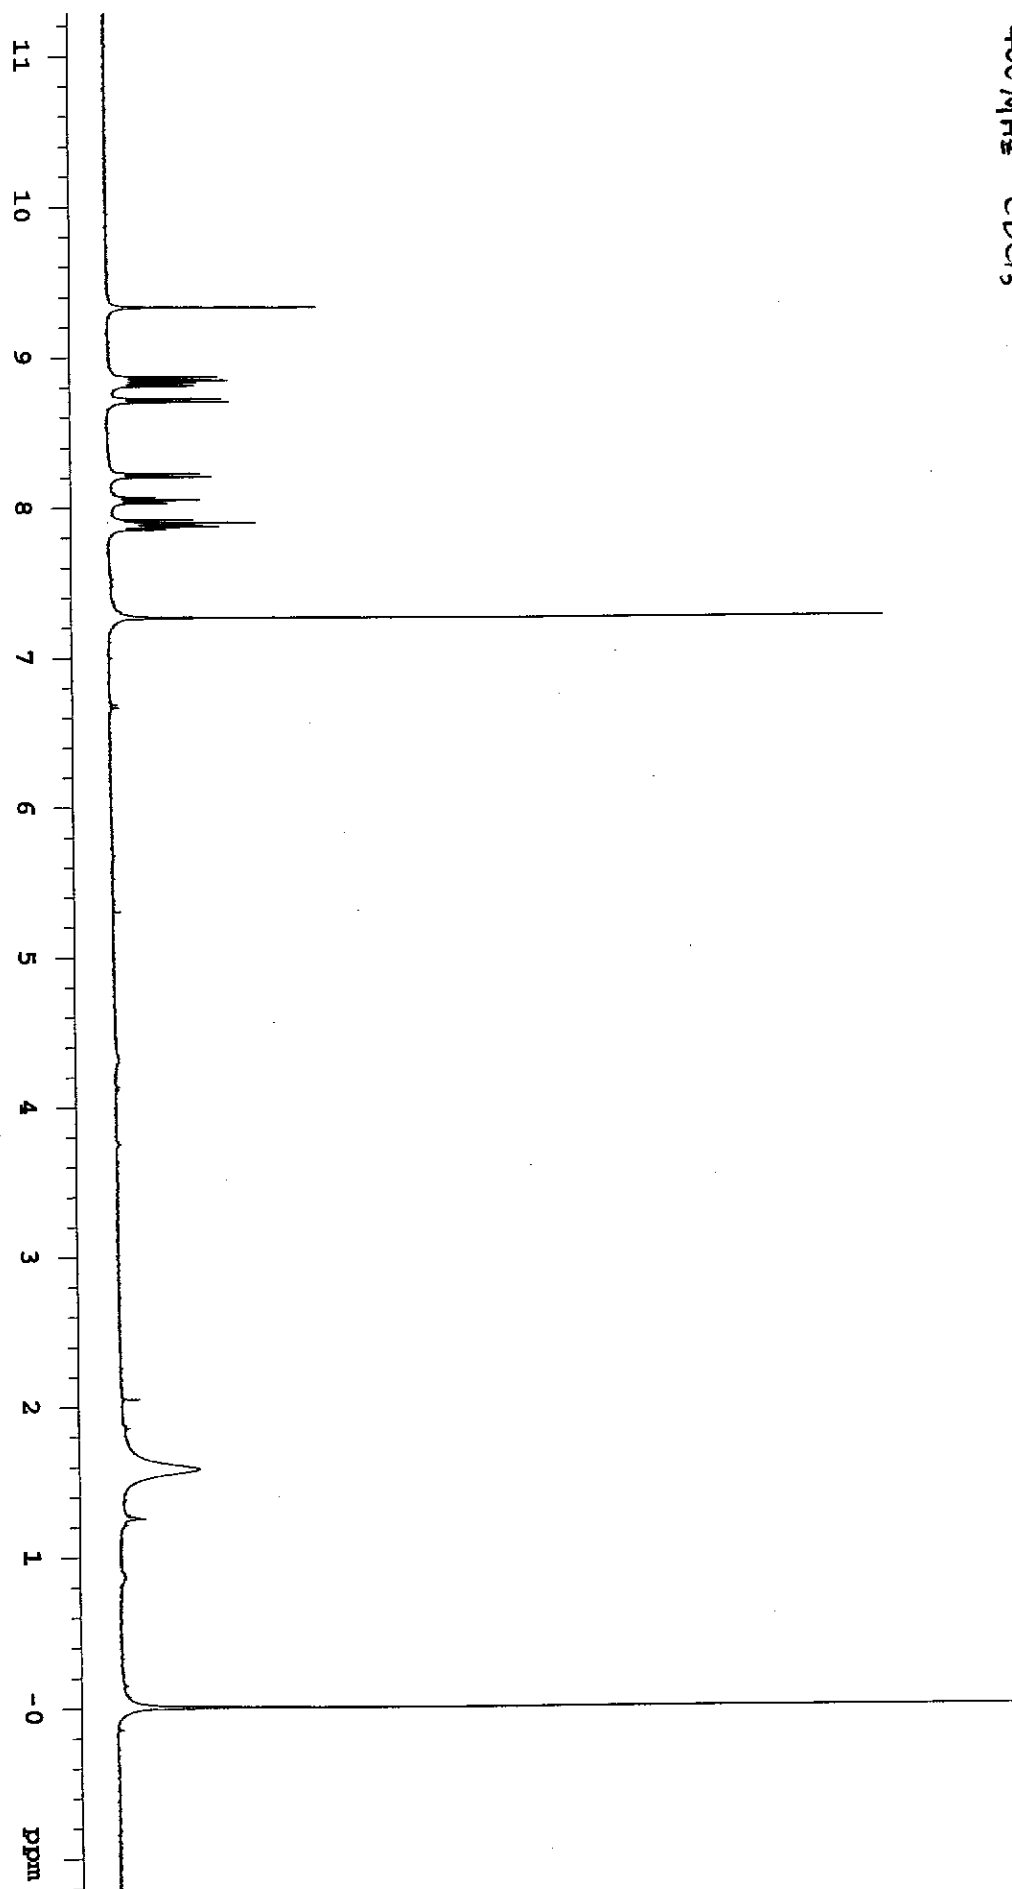

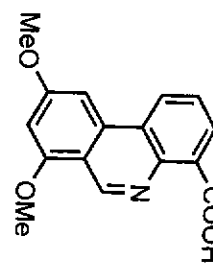

49b

400 MHz CDCl<sub>3</sub>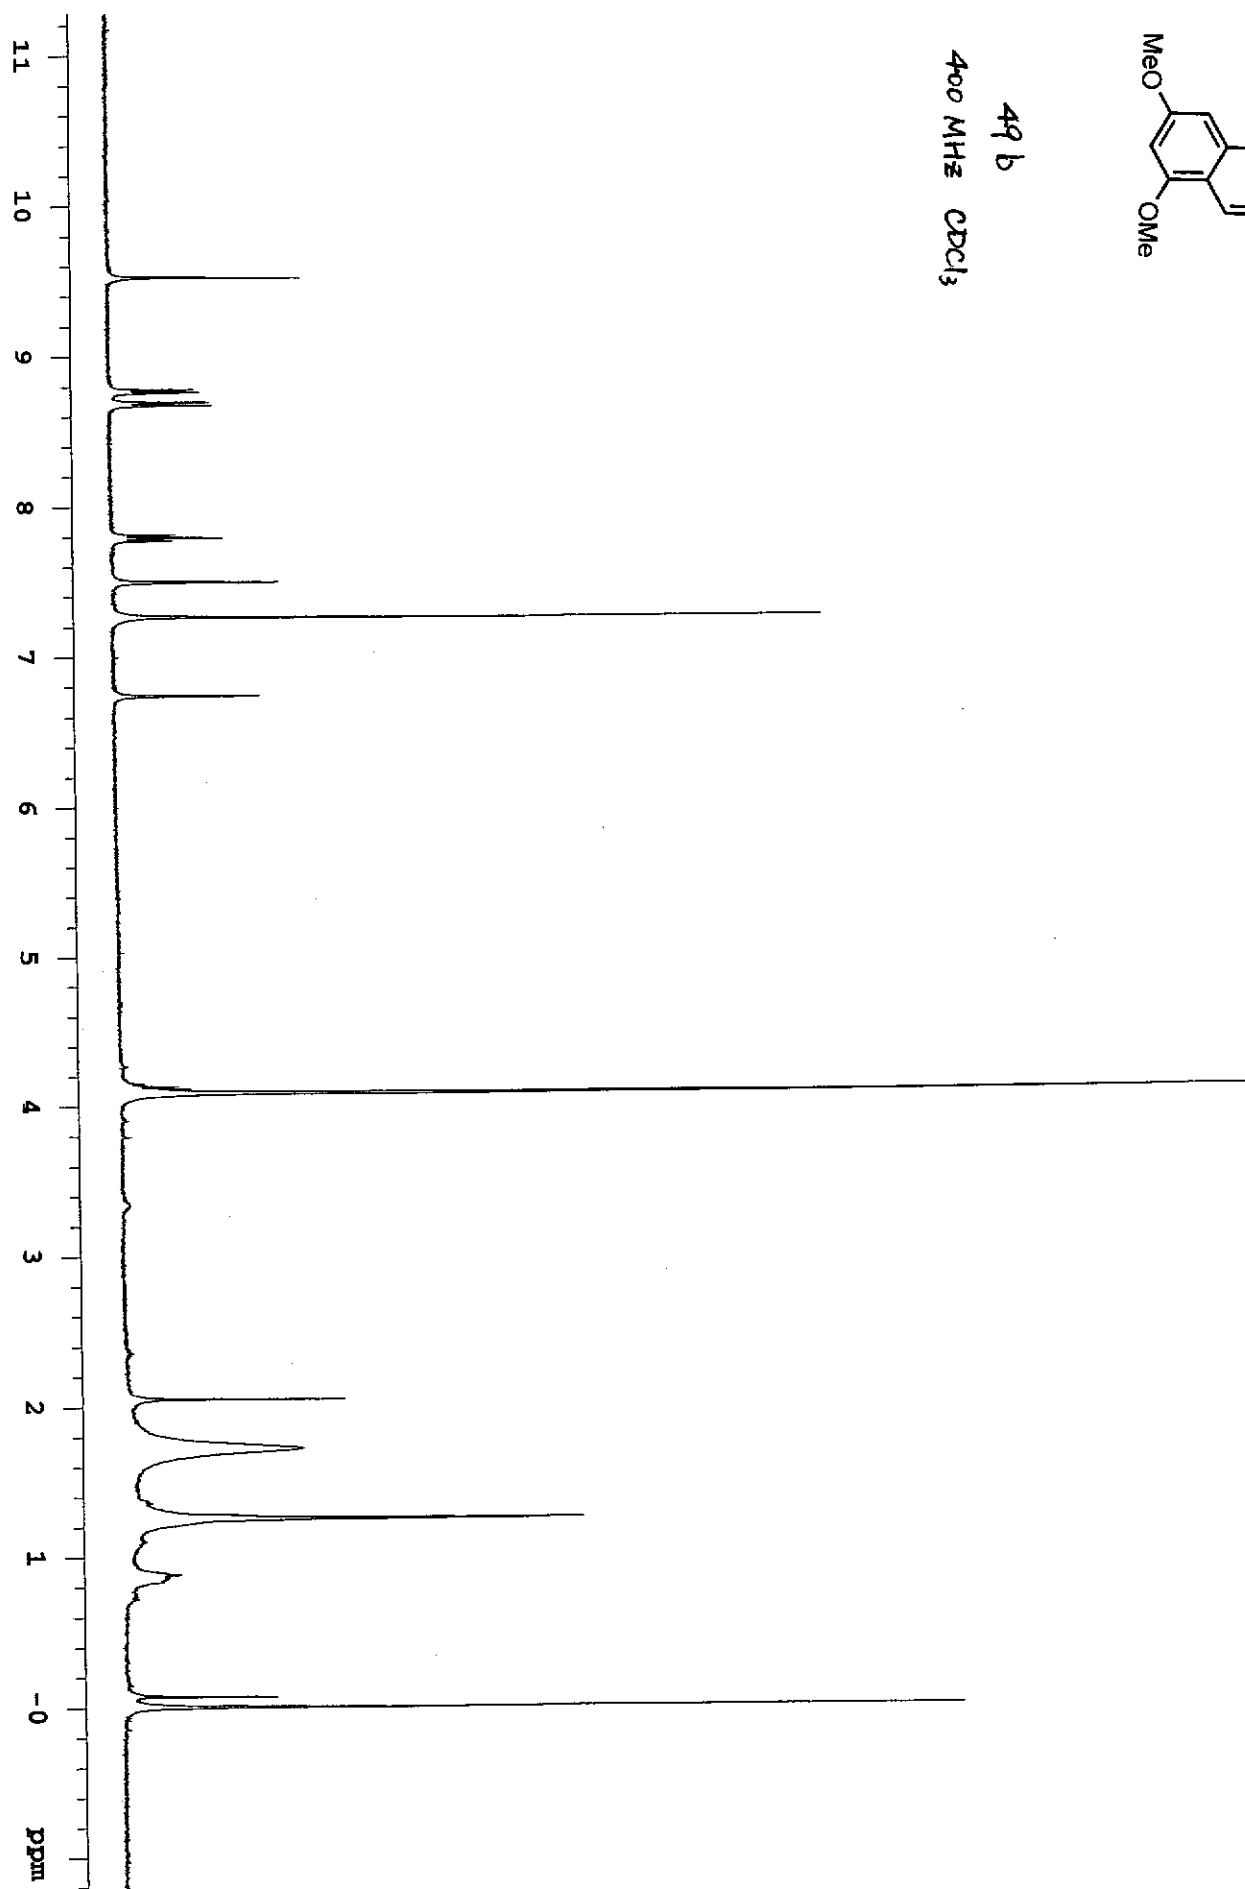

Run-4-113-3

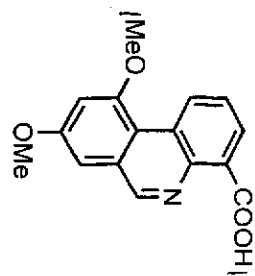

49c

400 MHz CDCl<sub>3</sub>

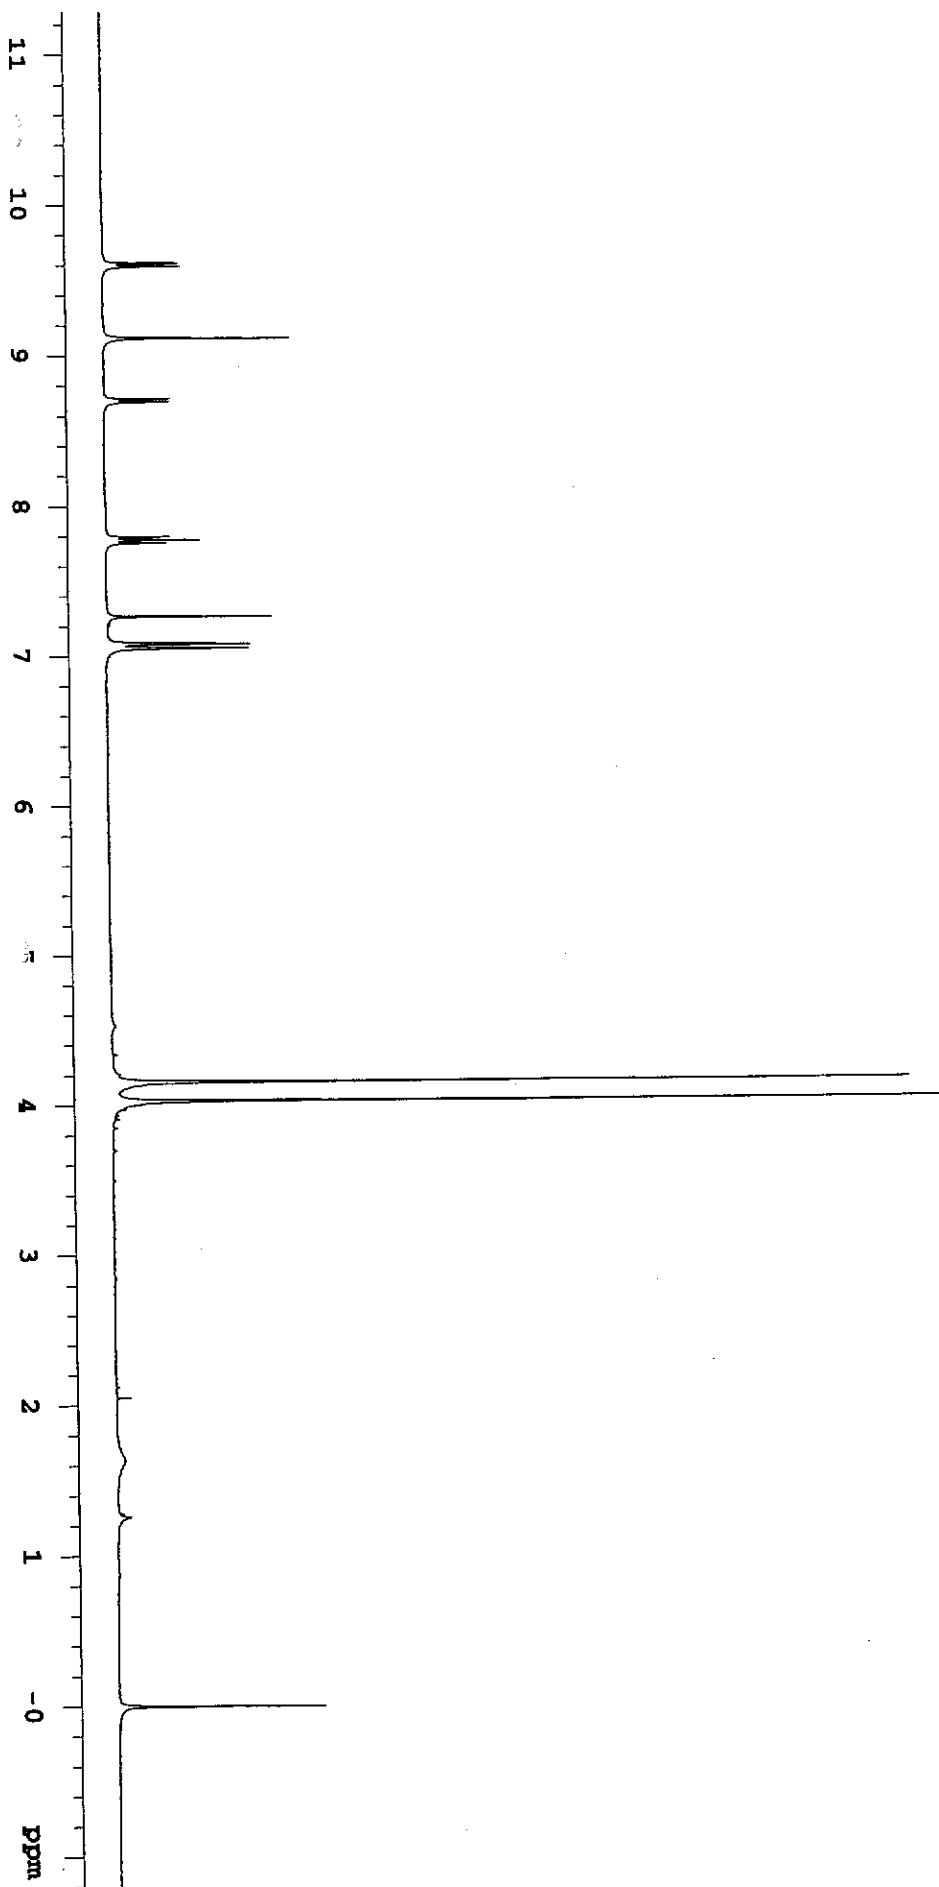

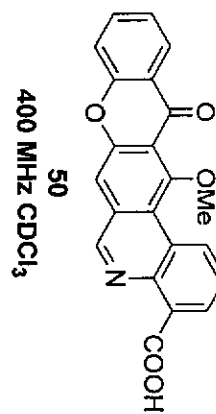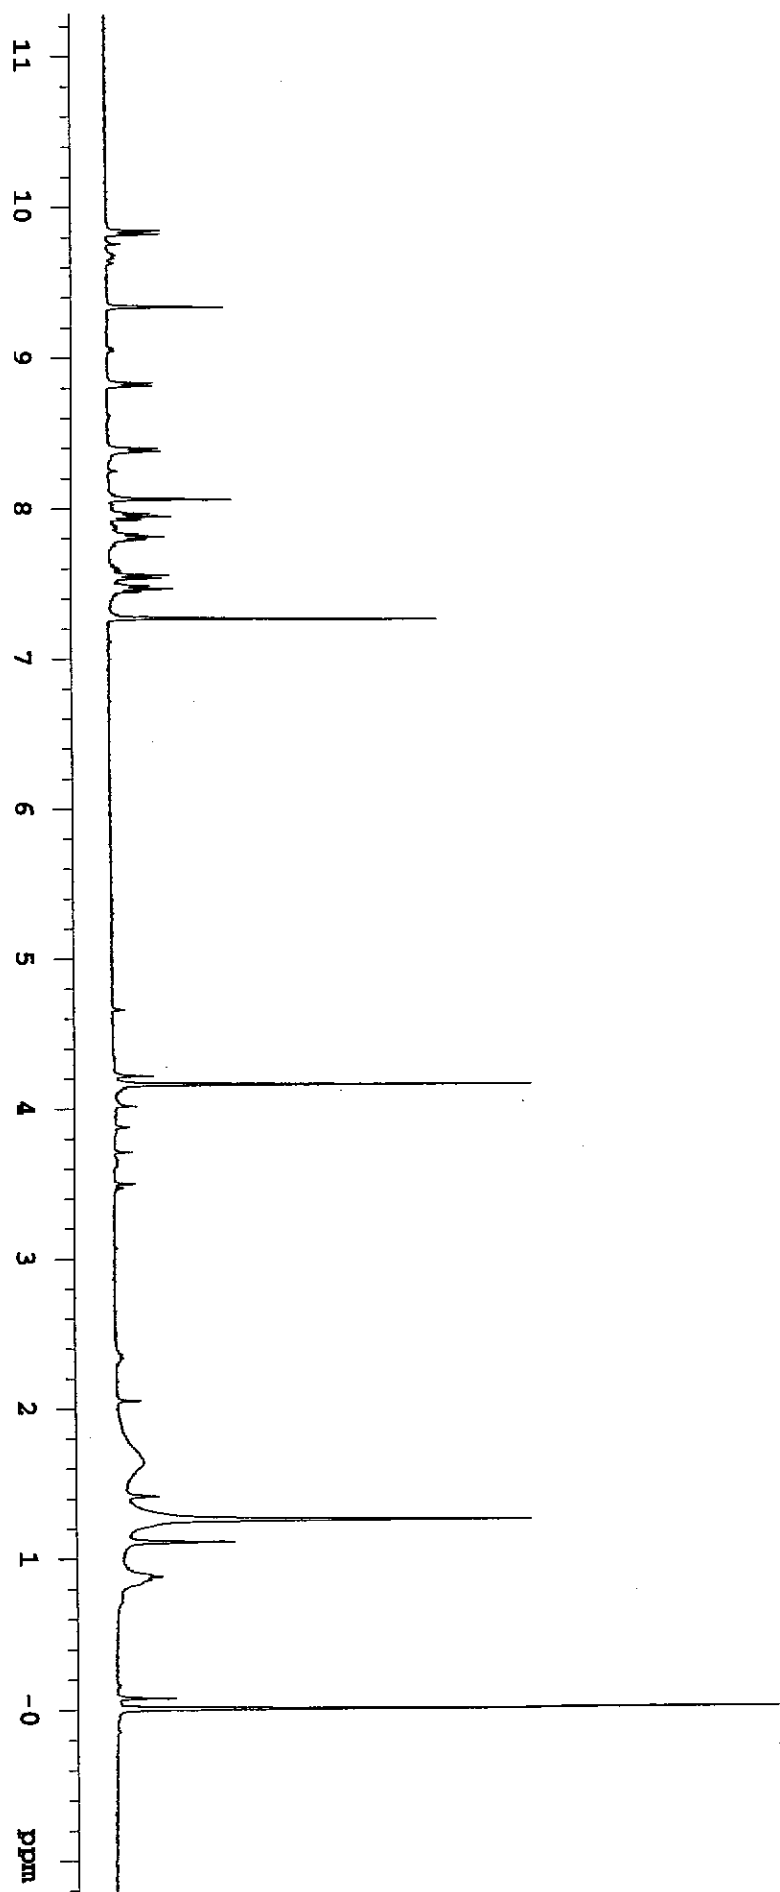

Supplement: NIHMS261255-supplement-supporting_data.pdf [file NIHMS261255-supplement-supporting_data.pdf]
